# Supplementary material for: Attenuation of Postischemic Genomic Alteration by Mesenchymal Stem Cells: a Microarray Study
Source: PubMed Central journal article supplement — Mol Cells. 2016 Feb 29;39(4):337–44. doi: 10.14348/molcells.2016.2317 (PMC4844941; doi:10.14348/molcells.2016.2317), 2016-02-29
Supplement: molce-39-4-337-supple.pdf [file molce-39-4-337-supple.pdf]

### **Legends for Supplementary Data**

Supplementary Table S1. List of DEGs among the normal, sham, and MSC groups with one-way analysis of variance analysis (ANOVA).

<sup>a</sup> Probe ID of the Agilent rat mRNA microarray chip (SurePrint G3 Rat Gene Expression 8x60k, Agilent Inc., Santa Clara, CA, USA)

<sup>b</sup> *p*-value of ANOVA after Benjamini-Hochberg's multiple testing correction

Abbreviations: FD, fold difference; NL, normal group

Supplementary Table S2. List of DEGs between the MSC and sham groups.

<sup>a</sup> Probe ID of Agilent rat mRNA microarray chip (SurePrint G3 Rat Gene Expression 8x60k, Agilent Inc., Santa Clara, CA, USA)

Abbreviation: FD, fold difference

Supplementary Table 1. List of differentially expressed genes using among normal group, sham group and MSC group using one-way analysis of variance analysis (ANOVA)

| Probe ID <sup>a</sup> | Gene symbol | Gene name                                                           | ANOVA                 | Sham vs. NL     |          | MSC .vs NL      |          | MSC vs. sham    |          |
|-----------------------|-------------|---------------------------------------------------------------------|-----------------------|-----------------|----------|-----------------|----------|-----------------|----------|
|                       |             |                                                                     | <i>p</i> <sup>b</sup> | FD <sup>c</sup> | <i>p</i> | FD <sup>c</sup> | <i>p</i> | FD <sup>c</sup> | <i>p</i> |
| A_44_P990376          | Gpnmb       | glycoprotein (transmembrane) nmb                                    | 5.26E-03              | 7.56            | 3.40E-04 | 3.06            | 2.11E-02 | -2.47           | 6.26E-02 |
| A_44_P342289          | H19         | H19, imprinted maternally expressed transcript (non-protein coding) | 3.96E-02              | 7.53            | 7.88E-03 | 3.16            | 1.15E-01 | -2.38           | 2.66E-01 |
| A_64_P059728          |             |                                                                     | 4.06E-03              | 7.45            | 2.18E-04 | 3.04            | 1.56E-02 | -2.45           | 5.09E-02 |
| A_44_P491796          | Spp1        | secreted phosphoprotein 1                                           | 1.35E-02              | 6.94            | 1.64E-03 | 3.37            | 2.87E-02 | -2.06           | 2.27E-01 |
| A_64_P105477          | Fcrls       | Fc receptor-like S, scavenger receptor                              | 4.51E-02              | 6.43            | 1.04E-02 | 3.35            | 8.11E-02 | -1.92           | 4.33E-01 |
| A_43_P12698           | Lgals3      | lectin, galactoside-binding, soluble, 3                             | 3.80E-03              | 6.24            | 1.96E-04 | 2.64            | 1.91E-02 | -2.36           | 3.71E-02 |
| A_44_P461154          | Timp1       | TIMP metalloproteinase inhibitor 1                                  | 9.48E-04              | 5.64            | 1.52E-05 | 1.96            | 2.60E-02 | -2.88           | 1.13E-03 |
| A_64_P158653          | Knstrn      | kinetochore-localized astrin/SPAG5 binding protein                  | 1.97E-03              | 5.23            | 6.18E-05 | 2.08            | 2.70E-02 | -2.51           | 6.48E-03 |
| A_64_P045922          | Clec12a     | C-type lectin domain family 12, member A                            | 1.47E-03              | 4.96            | 3.60E-05 | 2.12            | 1.41E-02 | -2.34           | 6.28E-03 |
| A_64_P098921          | Cdca3       | cell division cycle associated 3                                    | 2.92E-03              | 4.81            | 1.23E-04 | 2.11            | 2.68E-02 | -2.28           | 1.51E-02 |
| A_42_P580844          | Cdk1        | cyclin-dependent kinase 1                                           | 1.29E-03              | 4.77            | 2.80E-05 | 1.96            | 2.02E-02 | -2.43           | 3.19E-03 |
| A_64_P078332          | Glycam1     | glycosylation dependent cell adhesion molecule 1                    | 1.36E-02              | 4.73            | 1.90E-03 | 1.60            | 3.75E-01 | -2.96           | 1.73E-02 |
| A_64_P001741          | Ccna2       | cyclin A2                                                           | 1.54E-03              | 4.70            | 4.00E-05 | 2.02            | 1.87E-02 | -2.33           | 5.43E-03 |
| A_64_P038107          | Apobec1     | apolipoprotein B mRNA editing enzyme, catalytic polypeptide 1       | 6.80E-04              | 4.59            | 7.11E-06 | 1.90            | 1.05E-02 | -2.41           | 9.81E-04 |
| A_64_P001740          | Ccna2       | cyclin A2                                                           | 2.47E-03              | 4.58            | 8.95E-05 | 2.10            | 1.97E-02 | -2.18           | 1.41E-02 |
| A_44_P992908          | Hspb1       | heat shock protein 1                                                | 4.38E-02              | 4.56            | 8.92E-03 | 2.14            | 1.88E-01 | -2.14           | 1.88E-01 |

|                   |           |                                                          |          |      |          |      |          |       |          |
|-------------------|-----------|----------------------------------------------------------|----------|------|----------|------|----------|-------|----------|
| A_44_P103229<br>6 | Capg      | capping protein (actin filament), gelsolin-like          | 3.62E-03 | 4.45 | 1.81E-04 | 2.04 | 3.27E-02 | -2.18 | 1.97E-02 |
| A_64_P019260      | Cd68      | Cd68 molecule                                            | 3.96E-03 | 4.42 | 2.09E-04 | 2.24 | 1.73E-02 | -1.97 | 4.39E-02 |
| A_43_P11489       | S100a4    | S100 calcium-binding protein A4                          | 4.81E-03 | 4.33 | 2.90E-04 | 2.12 | 2.89E-02 | -2.04 | 3.85E-02 |
| A_64_P048183      | Ckap2     | cytoskeleton associated protein 2                        | 3.98E-03 | 4.27 | 2.11E-04 | 1.96 | 4.14E-02 | -2.18 | 1.85E-02 |
| A_64_P104009      | Rrm2      | ribonucleotide reductase M2                              | 3.11E-03 | 4.19 | 1.36E-04 | 2.01 | 2.46E-02 | -2.08 | 1.87E-02 |
| A_44_P469584      | Cd14      | CD14 molecule                                            | 9.52E-03 | 4.07 | 8.65E-04 | 1.99 | 6.56E-02 | -2.04 | 5.63E-02 |
| A_64_P163822      | Cks2      | CDC28 protein kinase regulatory subunit 2                | 2.12E-03 | 3.95 | 7.15E-05 | 1.86 | 2.61E-02 | -2.12 | 8.06E-03 |
| A_64_P002854      | Ckap2     | cytoskeleton associated protein 2                        | 1.00E-02 | 3.92 | 9.35E-04 | 1.96 | 6.63E-02 | -1.99 | 6.05E-02 |
| A_42_P714311      | Ccl3      | chemokine (C-C motif) ligand 3                           | 5.88E-03 | 3.89 | 3.97E-04 | 2.04 | 3.15E-02 | -1.91 | 5.03E-02 |
| A_43_P11142       | S100a11   | S100 calcium binding protein A11                         | 5.36E-04 | 3.82 | 4.28E-06 | 1.73 | 9.75E-03 | -2.21 | 5.30E-04 |
| A_42_P638620      | Lcn2      | lipocalin 2                                              | 1.22E-02 | 3.81 | 1.29E-03 | 2.00 | 6.42E-02 | -1.91 | 8.71E-02 |
| A_44_P104271<br>1 | Kif20a    | kinesin family member 20A                                | 1.16E-03 | 3.77 | 2.34E-05 | 1.73 | 2.40E-02 | -2.18 | 2.12E-03 |
| A_64_P147871      | S100a11   | S100 calcium binding protein A11                         | 6.11E-04 | 3.76 | 5.60E-06 | 1.73 | 1.04E-02 | -2.17 | 7.21E-04 |
| A_64_P117363      |           |                                                          | 1.97E-03 | 3.75 | 6.13E-05 | 1.84 | 2.15E-02 | -2.04 | 8.09E-03 |
| A_64_P036925      | Cp        | ceruloplasmin (ferroxidase)                              | 7.76E-04 | 3.75 | 9.10E-06 | 1.76 | 1.14E-02 | -2.14 | 1.26E-03 |
| A_64_P148906      | Aspg      | asparaginase homolog ( <i>S. cerevisiae</i> )            | 1.93E-02 | 3.75 | 2.59E-03 | 1.87 | 1.27E-01 | -2.00 | 8.81E-02 |
| A_44_P102245<br>8 | Tubb6     | tubulin, beta 6 class V                                  | 1.33E-02 | 3.73 | 1.47E-03 | 2.05 | 5.56E-02 | -1.83 | 1.14E-01 |
| A_42_P788740      | Folr2     | folate receptor 2 (fetal)                                | 2.62E-03 | 3.71 | 9.87E-05 | 1.95 | 1.58E-02 | -1.90 | 1.99E-02 |
| A_64_P147868<br>1 | RGD156358 | similar to S100 calcium binding protein A11 (calizzarin) | 6.22E-04 | 3.68 | 5.86E-06 | 1.71 | 1.10E-02 | -2.15 | 7.23E-04 |

|              |              |                                                         |          |      |          |      |          |       |          |
|--------------|--------------|---------------------------------------------------------|----------|------|----------|------|----------|-------|----------|
| A_64_P060291 | Glipr1       | GLI pathogenesis-related 1                              | 4.17E-03 | 3.64 | 2.25E-04 | 1.97 | 2.25E-02 | -1.85 | 3.70E-02 |
| A_64_P068353 | Mki67        | antigen identified by monoclonal antibody Ki-67         | 1.00E-03 | 3.58 | 1.56E-05 | 1.74 | 1.43E-02 | -2.06 | 2.08E-03 |
| A_64_P163919 | Mki67        | antigen identified by monoclonal antibody Ki-67         | 6.72E-04 | 3.51 | 7.49E-06 | 1.59 | 2.33E-02 | -2.20 | 4.98E-04 |
| A_42_P577431 | Bcl3         | B-cell CLL/lymphoma 3                                   | 8.22E-03 | 3.47 | 7.00E-04 | 1.98 | 3.36E-02 | -1.75 | 8.66E-02 |
| A_64_P153552 | LOC100362296 | protein S100-A11-like                                   | 1.73E-03 | 3.46 | 4.87E-05 | 1.75 | 2.10E-02 | -1.97 | 6.20E-03 |
| A_42_P818287 | Nusap1       | nucleolar and spindle associated protein 1              | 7.32E-04 | 3.45 | 8.49E-06 | 1.64 | 1.63E-02 | -2.10 | 8.19E-04 |
| A_42_P572521 | C5ar1        | complement component 5a receptor 1                      | 1.76E-02 | 3.43 | 2.42E-03 | 2.12 | 4.37E-02 | -1.62 | 2.24E-01 |
| A_43_P14233  | Pttg1        | pituitary tumor-transforming 1                          | 1.78E-03 | 3.42 | 5.15E-05 | 1.72 | 2.56E-02 | -1.99 | 5.45E-03 |
| A_42_P509365 | Vim          | vimentin                                                | 2.10E-03 | 3.39 | 7.05E-05 | 1.72 | 2.82E-02 | -1.97 | 7.32E-03 |
| A_43_P11370  | Plp2         | proteolipid protein 2 (colonic epithelium-enriched)     | 9.57E-04 | 3.33 | 1.47E-05 | 1.68 | 1.46E-02 | -1.99 | 1.89E-03 |
| A_42_P676304 | Ifitm1       | interferon induced transmembrane protein 1              | 1.83E-02 | 3.31 | 2.58E-03 | 2.08 | 4.35E-02 | -1.59 | 2.38E-01 |
| A_64_P053012 | Cd163        | CD163 molecule                                          | 3.89E-02 | 3.27 | 9.06E-03 | 1.43 | 5.15E-01 | -2.29 | 5.44E-02 |
| A_64_P095920 | Ccl6         | chemokine (C-C motif) ligand 6                          | 1.54E-03 | 3.26 | 4.50E-05 | 1.54 | 6.11E-02 | -2.12 | 1.92E-03 |
| A_43_P16707  | Ccl6         | chemokine (C-C motif) ligand 6                          | 1.24E-03 | 3.26 | 2.88E-05 | 1.54 | 5.00E-02 | -2.12 | 1.35E-03 |
| A_64_P025753 | Bub1         | budding uninhibited by benzimidazoles 1 homolog (yeast) | 1.34E-03 | 3.25 | 3.03E-05 | 1.68 | 1.90E-02 | -1.94 | 3.74E-03 |
| A_42_P458530 | Ripk3        | receptor-interacting serine-threonine kinase 3          | 8.93E-03 | 3.21 | 8.11E-04 | 1.95 | 3.01E-02 | -1.65 | 1.12E-01 |
| A_44_P822041 | LOC685108    | similar to proteolipid protein 2                        | 1.69E-03 | 3.20 | 4.71E-05 | 1.68 | 2.31E-02 | -1.91 | 5.40E-03 |
| A_44_P550662 | Ms4a6a       | membrane-spanning 4-domains, subfamily A, member 6A     | 1.78E-03 | 3.19 | 5.18E-05 | 1.65 | 2.83E-02 | -1.93 | 4.96E-03 |
| A_43_P11472  | Hmox1        | heme oxygenase (decycling) 1                            | 1.09E-02 | 3.18 | 1.06E-03 | 1.80 | 6.38E-02 | -1.77 | 7.20E-02 |

|              |        |                                                                                         |          |      |          |      |          |       |          |
|--------------|--------|-----------------------------------------------------------------------------------------|----------|------|----------|------|----------|-------|----------|
| A_42_P576823 | Mki67  | antigen identified by monoclonal antibody Ki-67                                         | 7.05E-04 | 3.18 | 7.96E-06 | 1.59 | 1.54E-02 | -2.00 | 7.94E-04 |
| A_64_P016810 | Myo1f  | myosin IF                                                                               | 4.25E-03 | 3.14 | 2.34E-04 | 1.79 | 2.70E-02 | -1.76 | 3.23E-02 |
| A_42_P544601 | Tspo   | translocator protein                                                                    | 5.40E-03 | 3.13 | 3.48E-04 | 1.82 | 2.92E-02 | -1.72 | 4.69E-02 |
| A_43_P14872  | Sdc1   | syndecan 1                                                                              | 2.41E-02 | 3.11 | 3.66E-03 | 1.86 | 8.83E-02 | -1.67 | 1.75E-01 |
| A_64_P052745 | Mcm3   | minichromosome maintenance complex component 3                                          | 2.04E-03 | 3.10 | 6.49E-05 | 1.69 | 2.14E-02 | -1.83 | 8.73E-03 |
| A_64_P051322 | Ncf1   | neutrophil cytosolic factor 1                                                           | 4.19E-03 | 3.08 | 2.27E-04 | 1.76 | 2.84E-02 | -1.75 | 2.96E-02 |
| A_42_P520891 | Prc1   | protein regulator of cytokinesis 1                                                      | 3.36E-03 | 3.04 | 1.60E-04 | 1.65 | 4.19E-02 | -1.84 | 1.32E-02 |
| A_64_P048461 | Mcm3   | minichromosome maintenance complex component 3                                          | 1.06E-03 | 3.03 | 1.82E-05 | 1.60 | 1.79E-02 | -1.90 | 2.05E-03 |
| A_42_P735417 | Fcgr2b | Fc fragment of IgG, low affinity IIb, receptor (CD32)                                   | 2.27E-03 | 3.03 | 7.92E-05 | 1.68 | 2.32E-02 | -1.81 | 1.03E-02 |
| A_43_P17697  | Ms4a6b | membrane-spanning 4-domains, subfamily A, member 6B                                     | 2.21E-03 | 3.00 | 7.69E-05 | 1.63 | 3.02E-02 | -1.84 | 7.61E-03 |
| A_44_P306439 | Fcgr3a | Fc fragment of IgG, low affinity IIIa, receptor                                         | 3.59E-03 | 2.99 | 1.77E-04 | 1.68 | 3.35E-02 | -1.78 | 1.87E-02 |
| A_43_P11879  | Htr2b  | 5-hydroxytryptamine (serotonin) receptor 2B, G protein-coupled                          | 7.33E-03 | 2.98 | 5.76E-04 | 1.77 | 3.88E-02 | -1.68 | 6.15E-02 |
| A_64_P166385 | Kifc1  | kinesin family member C1                                                                | 4.73E-04 | 2.94 | 3.45E-06 | 1.50 | 1.51E-02 | -1.97 | 2.66E-04 |
| A_64_P018781 | Calcb  | calcitonin-related polypeptide, beta                                                    | 8.31E-03 | 2.94 | 7.01E-04 | 1.68 | 6.45E-02 | -1.75 | 4.57E-02 |
| A_42_P839964 | Plin2  | perilipin 2                                                                             | 3.80E-03 | 2.93 | 1.95E-04 | 1.74 | 2.16E-02 | -1.68 | 3.26E-02 |
| A_44_P993328 | Ms4a11 | membrane-spanning 4-domains, subfamily A, member 11                                     | 3.70E-03 | 2.93 | 1.87E-04 | 1.69 | 2.96E-02 | -1.73 | 2.26E-02 |
| A_64_P044663 | Rac2   | ras-related C3 botulinum toxin substrate 2 (rho family, small GTP binding protein Rac2) | 3.44E-03 | 2.91 | 1.62E-04 | 1.70 | 2.45E-02 | -1.71 | 2.32E-02 |
| A_43_P11616  | Atf3   | activating transcription factor 3                                                       | 1.51E-02 | 2.90 | 1.90E-03 | 1.91 | 3.76E-02 | -1.52 | 2.06E-01 |
| A_64_P126065 | Hcst   | hematopoietic cell signal transducer                                                    | 6.69E-04 | 2.89 | 7.15E-06 | 1.51 | 1.77E-02 | -1.91 | 6.06E-04 |

|              |         |                                                                     |          |      |          |      |          |       |          |
|--------------|---------|---------------------------------------------------------------------|----------|------|----------|------|----------|-------|----------|
| A_42_P738549 | Napsa   | napsin A aspartic peptidase                                         | 3.04E-02 | 2.88 | 5.59E-03 | 1.93 | 6.70E-02 | -1.49 | 3.16E-01 |
| A_44_P234129 | Dlgap5  | discs, large (Drosophila) homolog-associated protein 5              | 1.41E-03 | 2.87 | 3.42E-05 | 1.56 | 2.57E-02 | -1.84 | 3.23E-03 |
| A_42_P822726 | Myo1g   | myosin IG                                                           | 1.48E-02 | 2.86 | 1.89E-03 | 1.93 | 3.15E-02 | -1.48 | 2.37E-01 |
| A_43_P11614  | Anxa1   | annexin A1                                                          | 3.82E-04 | 2.85 | 2.08E-06 | 1.51 | 8.04E-03 | -1.89 | 2.35E-04 |
| A_64_P080817 | Cd44    | Cd44 molecule                                                       | 1.55E-02 | 2.85 | 1.95E-03 | 1.86 | 4.36E-02 | -1.53 | 1.86E-01 |
| A_42_P581001 | S100a6  | S100 calcium binding protein A6                                     | 7.95E-04 | 2.84 | 9.97E-06 | 1.50 | 2.04E-02 | -1.89 | 8.21E-04 |
| A_44_P286788 | Ncf4    | neutrophil cytosolic factor 4                                       | 6.38E-03 | 2.84 | 4.53E-04 | 1.70 | 3.81E-02 | -1.66 | 4.82E-02 |
| A_44_P465931 | Clic1   | chloride intracellular channel 1                                    | 5.24E-03 | 2.82 | 3.39E-04 | 1.59 | 6.27E-02 | -1.77 | 2.10E-02 |
| A_44_P445070 | Lgals1  | lectin, galactoside-binding, soluble, 1                             | 2.72E-03 | 2.80 | 1.15E-04 | 1.51 | 6.14E-02 | -1.86 | 5.97E-03 |
| A_44_P463313 | Plk1    | polo-like kinase 1                                                  | 1.70E-03 | 2.77 | 4.78E-05 | 1.56 | 2.55E-02 | -1.77 | 4.98E-03 |
| A_64_P050303 | Spc25   | SPC25, NDC80 kinetochore complex component, homolog (S. cerevisiae) | 2.47E-03 | 2.76 | 9.56E-05 | 1.51 | 5.19E-02 | -1.83 | 5.72E-03 |
| A_42_P712191 | Gins1   | GINS complex subunit 1 (Psf1 homolog)                               | 1.12E-03 | 2.76 | 2.29E-05 | 1.46 | 3.92E-02 | -1.89 | 1.28E-03 |
| A_42_P517399 | Emp3    | epithelial membrane protein 3                                       | 3.45E-03 | 2.75 | 1.64E-04 | 1.64 | 2.72E-02 | -1.68 | 2.12E-02 |
| A_44_P552830 | A3galt2 | alpha 1,3-galactosyltransferase 2                                   | 1.32E-02 | 2.72 | 1.44E-03 | 1.65 | 7.94E-02 | -1.65 | 7.88E-02 |
| A_64_P108200 | Kif22   | kinesin family member 22                                            | 2.73E-03 | 2.71 | 1.11E-04 | 1.54 | 4.12E-02 | -1.76 | 8.68E-03 |
| A_42_P843603 | Tk1     | thymidine kinase 1, soluble                                         | 1.66E-03 | 2.71 | 4.81E-05 | 1.50 | 3.69E-02 | -1.81 | 3.46E-03 |
| A_42_P468216 | Ifi30   | interferon gamma inducible protein 30                               | 7.18E-03 | 2.69 | 5.66E-04 | 1.75 | 2.60E-02 | -1.54 | 8.84E-02 |
| A_44_P260072 | Tbxas1  | thromboxane A synthase 1, platelet                                  | 2.31E-02 | 2.69 | 3.60E-03 | 1.81 | 6.00E-02 | -1.49 | 2.42E-01 |
| A_64_P162764 |         |                                                                     | 2.86E-03 | 2.69 | 1.34E-04 | 1.42 | 1.06E-01 | -1.89 | 4.06E-03 |

|               |          |                                                   |          |      |          |      |          |       |          |
|---------------|----------|---------------------------------------------------|----------|------|----------|------|----------|-------|----------|
| A_64_P148321  | Nes      | nestin                                            | 1.87E-03 | 2.68 | 5.73E-05 | 1.53 | 2.90E-02 | -1.75 | 5.49E-03 |
| A_64_P123603  | Mt1a     | metallothionein 1a                                | 4.10E-03 | 2.67 | 2.54E-04 | 1.41 | 1.44E-01 | -1.89 | 6.10E-03 |
| A_44_P807058  | Emp1     | epithelial membrane protein 1                     | 8.38E-03 | 2.66 | 7.07E-04 | 1.66 | 4.71E-02 | -1.60 | 6.33E-02 |
| A_44_P339798  | Hist1h1b | histone cluster 1, H1b                            | 2.63E-03 | 2.65 | 1.08E-04 | 1.48 | 5.96E-02 | -1.80 | 5.71E-03 |
| A_44_P428420  | Ctsz     | cathepsin Z                                       | 8.94E-03 | 2.65 | 7.89E-04 | 1.65 | 5.07E-02 | -1.61 | 6.60E-02 |
| A_44_P1020422 | Nes      | nestin                                            | 1.97E-03 | 2.65 | 6.01E-05 | 1.57 | 2.03E-02 | -1.68 | 8.33E-03 |
| A_64_P147373  | Gja5     | gap junction protein, alpha 5                     | 3.47E-04 | 2.64 | 3.81E-06 | 1.17 | 3.47E-01 | -2.25 | 1.69E-05 |
| A_44_P360772  | Tagln    | transgelin                                        | 1.59E-04 | 2.61 | 3.66E-07 | 1.30 | 2.96E-02 | -2.01 | 8.06E-06 |
| A_64_P049619  | Gpr183   | G protein-coupled receptor 183                    | 3.54E-02 | 2.60 | 8.10E-03 | 1.97 | 4.61E-02 | -1.32 | 5.32E-01 |
| A_64_P066979  | Hist1h1b | histone cluster 1, H1b                            | 4.17E-03 | 2.60 | 2.35E-04 | 1.49 | 7.21E-02 | -1.75 | 1.19E-02 |
| A_43_P11819   | Ctsc     | cathepsin C                                       | 9.52E-03 | 2.59 | 8.63E-04 | 1.62 | 5.83E-02 | -1.60 | 6.33E-02 |
| A_42_P807697  | Tyrobp   | Tyro protein tyrosine kinase binding protein      | 7.99E-03 | 2.58 | 6.69E-04 | 1.68 | 3.30E-02 | -1.53 | 8.41E-02 |
| A_42_P483564  | Ptprc    | protein tyrosine phosphatase, receptor type, C    | 1.07E-02 | 2.58 | 1.08E-03 | 1.74 | 3.21E-02 | -1.48 | 1.40E-01 |
| A_43_P11749   | Hck      | hemopoietic cell kinase                           | 5.79E-03 | 2.57 | 3.89E-04 | 1.64 | 3.13E-02 | -1.57 | 4.94E-02 |
| A_64_P026517  | Parvg    | parvin, gamma                                     | 7.94E-03 | 2.56 | 6.47E-04 | 1.62 | 4.71E-02 | -1.59 | 5.75E-02 |
| A_44_P226597  | Pycard   | PYD and CARD domain containing                    | 4.11E-03 | 2.56 | 2.23E-04 | 1.52 | 5.21E-02 | -1.69 | 1.56E-02 |
| A_64_P104538  | Ttk      | Ttk protein kinase                                | 7.98E-04 | 2.56 | 1.00E-05 | 1.46 | 1.70E-02 | -1.75 | 9.81E-04 |
| A_44_P577090  | Rad51    | RAD51 homolog (S. cerevisiae)                     | 1.34E-03 | 2.56 | 3.22E-05 | 1.44 | 3.81E-02 | -1.77 | 2.02E-03 |
| A_42_P471271  | Ptpn6    | protein tyrosine phosphatase, non-receptor type 6 | 6.26E-03 | 2.55 | 4.40E-04 | 1.63 | 3.49E-02 | -1.57 | 5.09E-02 |

|              |           |                                                                      |          |      |          |      |          |       |          |
|--------------|-----------|----------------------------------------------------------------------|----------|------|----------|------|----------|-------|----------|
| A_42_P565275 | Aspm      | asp (abnormal spindle) homolog, microcephaly associated (Drosophila) | 1.22E-03 | 2.55 | 2.48E-05 | 1.53 | 1.43E-02 | -1.67 | 3.83E-03 |
| A_64_P083309 |           |                                                                      | 3.43E-02 | 2.55 | 6.63E-03 | 1.78 | 7.87E-02 | -1.44 | 3.19E-01 |
| A_44_P344346 | Arpc1b    | actin related protein 2/3 complex, subunit 1B                        | 6.04E-03 | 2.54 | 4.27E-04 | 1.50 | 8.09E-02 | -1.70 | 2.09E-02 |
| A_64_P101301 | Clec4a3   | C-type lectin domain family 4, member A3                             | 4.22E-03 | 2.54 | 2.33E-04 | 1.53 | 4.71E-02 | -1.66 | 1.83E-02 |
| A_44_P500708 | C1qc      | complement component 1, q subcomponent, C chain                      | 3.88E-03 | 2.54 | 2.04E-04 | 1.53 | 4.54E-02 | -1.66 | 1.62E-02 |
| A_64_P071495 | Actg2     | actin, gamma 2, smooth muscle, enteric                               | 1.48E-02 | 2.54 | 2.27E-03 | 1.30 | 4.38E-01 | -1.95 | 1.67E-02 |
| A_43_P12519  | S100a10   | S100 calcium binding protein A10                                     | 1.45E-02 | 2.53 | 1.69E-03 | 1.54 | 1.14E-01 | -1.65 | 6.41E-02 |
| A_44_P518500 | Racgap1   | Rac GTPase-activating protein 1                                      | 5.58E-03 | 2.51 | 3.65E-04 | 1.57 | 4.07E-02 | -1.59 | 3.55E-02 |
| A_64_P164804 | Gpr18     | G protein-coupled receptor 18                                        | 1.98E-02 | 2.51 | 2.81E-03 | 1.72 | 5.48E-02 | -1.46 | 2.11E-01 |
| A_64_P005576 | Anxa2     | annexin A2                                                           | 4.03E-04 | 2.49 | 2.39E-06 | 1.42 | 9.90E-03 | -1.75 | 2.36E-04 |
| A_64_P134741 | Hcls1     | hematopoietic cell specific Lyn substrate 1                          | 1.43E-03 | 2.48 | 3.48E-05 | 1.47 | 2.53E-02 | -1.69 | 3.35E-03 |
| A_64_P071973 | Fcgr2b    | Fc fragment of IgG, low affinity IIb, receptor (CD32)                | 3.66E-03 | 2.47 | 1.83E-04 | 1.56 | 2.79E-02 | -1.58 | 2.34E-02 |
| A_64_P136571 | Ssc5d     | scavenger receptor cysteine rich domain containing (5 domains)       | 2.02E-03 | 2.47 | 6.75E-05 | 1.45 | 4.23E-02 | -1.71 | 4.60E-03 |
| A_64_P050660 | Tnfaip8l2 | tumor necrosis factor, alpha-induced protein 8-like 2                | 2.58E-03 | 2.46 | 9.64E-05 | 1.53 | 2.39E-02 | -1.61 | 1.27E-02 |
| A_43_P15904  | Fcgr1a    | Fc fragment of IgG, high affinity Ia, receptor (CD64)                | 4.94E-03 | 2.46 | 3.02E-04 | 1.57 | 3.25E-02 | -1.56 | 3.60E-02 |
| A_64_P049977 | Gfap      | glial fibrillary acidic protein                                      | 2.18E-02 | 2.45 | 3.24E-03 | 1.68 | 6.38E-02 | -1.45 | 2.10E-01 |
| A_64_P066755 | Fam105a   | family with sequence similarity 105, member A                        | 7.96E-03 | 2.45 | 6.51E-04 | 1.59 | 4.49E-02 | -1.54 | 6.08E-02 |
| A_43_P12403  | Fgr       | Gardner-Rasheed feline sarcoma viral (v-fgr) oncogene homolog        | 1.16E-02 | 2.44 | 1.18E-03 | 1.58 | 6.48E-02 | -1.55 | 7.88E-02 |
| A_44_P237153 | Birc5     | baculoviral IAP repeat-containing 5                                  | 1.60E-03 | 2.43 | 4.49E-05 | 1.43 | 3.86E-02 | -1.70 | 3.04E-03 |



|                   |           |                                                 |          |      |          |      |          |       |          |
|-------------------|-----------|-------------------------------------------------|----------|------|----------|------|----------|-------|----------|
| A_64_P126851      | LOC498276 | Fc gamma receptor II beta                       | 3.15E-03 | 2.43 | 1.38E-04 | 1.56 | 2.09E-02 | -1.55 | 2.25E-02 |
| A_42_P619114      | Dnajc22   | DnaJ (Hsp40) homolog, subfamily C, member 22    | 6.39E-03 | 2.42 | 4.68E-04 | 1.65 | 2.30E-02 | -1.47 | 8.13E-02 |
| A_64_P038872      | A2m       | alpha-2-macroglobulin                           | 1.20E-03 | 2.41 | 2.47E-05 | 1.45 | 2.10E-02 | -1.66 | 2.61E-03 |
| A_42_P567268      | Mt2A      | metallothionein 2A                              | 4.63E-03 | 2.40 | 2.87E-04 | 1.43 | 8.58E-02 | -1.68 | 1.24E-02 |
| A_42_P460351      | Hlx       | H2.0-like homeobox                              | 2.08E-02 | 2.40 | 3.11E-03 | 1.70 | 5.03E-02 | -1.41 | 2.48E-01 |
| A_64_P158939      | Mt2A      | metallothionein 2A                              | 4.74E-03 | 2.39 | 3.05E-04 | 1.41 | 1.01E-01 | -1.70 | 1.12E-02 |
| A_64_P038873      | A2m       | alpha-2-macroglobulin                           | 1.30E-03 | 2.38 | 2.97E-05 | 1.43 | 2.80E-02 | -1.67 | 2.48E-03 |
| A_64_P032928      | Lcp1      | lymphocyte cytosolic protein 1                  | 8.18E-03 | 2.36 | 6.84E-04 | 1.55 | 4.94E-02 | -1.53 | 5.83E-02 |
| A_64_P153759      |           |                                                 | 1.40E-02 | 2.35 | 1.58E-03 | 1.58 | 6.11E-02 | -1.49 | 1.12E-01 |
| A_43_P13117       | Lcp2      | lymphocyte cytosolic protein 2                  | 5.46E-03 | 2.35 | 3.55E-04 | 1.51 | 4.54E-02 | -1.56 | 3.07E-02 |
| A_43_P12626       | Msln      | mesothelin                                      | 2.60E-03 | 2.35 | 2.31E-04 | 1.12 | 7.07E-01 | -2.09 | 5.95E-04 |
| A_64_P028205      | Lrg1      | leucine-rich alpha-2-glycoprotein 1             | 1.13E-03 | 2.35 | 2.81E-05 | 1.30 | 1.08E-01 | -1.81 | 6.01E-04 |
| A_64_P024297      | Gmfg      | glia maturation factor, gamma                   | 3.44E-03 | 2.34 | 1.64E-04 | 1.49 | 3.49E-02 | -1.57 | 1.64E-02 |
| A_42_P771570      | Cd33      | CD33 molecule                                   | 5.08E-03 | 2.34 | 3.18E-04 | 1.52 | 3.90E-02 | -1.54 | 3.17E-02 |
| A_43_P11537       | Rbp1      | retinol binding protein 1, cellular             | 4.26E-04 | 2.34 | 3.05E-06 | 1.32 | 3.09E-02 | -1.77 | 1.20E-04 |
| A_64_P120941      | Cd53      | Cd53 molecule                                   | 2.13E-02 | 2.33 | 3.42E-03 | 1.73 | 4.02E-02 | -1.35 | 3.19E-01 |
| A_64_P059011      | Cyba      | cytochrome b-245, alpha polypeptide             | 7.24E-03 | 2.33 | 5.78E-04 | 1.62 | 2.49E-02 | -1.44 | 9.44E-02 |
| A_44_P104131<br>2 | Fes       | feline sarcoma oncogene                         | 5.23E-03 | 2.33 | 3.32E-04 | 1.50 | 4.48E-02 | -1.55 | 2.89E-02 |
| A_64_P045476      | C1qb      | complement component 1, q subcomponent, B chain | 1.08E-03 | 2.32 | 1.90E-05 | 1.46 | 1.33E-02 | -1.60 | 2.89E-03 |

|               |           |                                                                                            |          |      |          |      |          |       |          |
|---------------|-----------|--------------------------------------------------------------------------------------------|----------|------|----------|------|----------|-------|----------|
| A_64_P084995  | Tnfrsf26  | tumor necrosis factor receptor superfamily, member 26                                      | 1.78E-03 | 2.32 | 5.04E-05 | 1.49 | 1.61E-02 | -1.56 | 8.42E-03 |
| A_64_P126623  |           |                                                                                            | 3.16E-03 | 2.31 | 1.39E-04 | 1.54 | 1.79E-02 | -1.50 | 2.65E-02 |
| A_42_P512838  | Trem2     | triggering receptor expressed on myeloid cells 2                                           | 1.28E-02 | 2.31 | 1.46E-03 | 1.65 | 3.47E-02 | -1.40 | 1.74E-01 |
| A_64_P268234  | Spc24-ps1 | SPC24, NDC80 kinetochore complex component, homolog ( <i>S. cerevisiae</i> ), pseudogene 1 | 1.92E-04 | 2.29 | 4.53E-07 | 1.29 | 1.69E-02 | -1.78 | 1.64E-05 |
| A_44_P588315  | Lyve1     | lymphatic vessel endothelial hyaluronan receptor 1                                         | 9.60E-03 | 2.29 | 1.41E-03 | 1.20 | 5.67E-01 | -1.91 | 6.53E-03 |
| A_44_P130898  | Ly86      | lymphocyte antigen 86                                                                      | 1.05E-02 | 2.28 | 1.05E-03 | 1.61 | 3.36E-02 | -1.42 | 1.31E-01 |
| A_64_P025286  | Lyz2      | lysozyme 2                                                                                 | 1.33E-02 | 2.28 | 1.55E-03 | 1.64 | 3.45E-02 | -1.39 | 1.85E-01 |
| A_64_P125973  | Tnfrsf1b  | tumor necrosis factor receptor superfamily, member 1b                                      | 7.20E-03 | 2.28 | 5.66E-04 | 1.58 | 2.75E-02 | -1.44 | 8.40E-02 |
| A_44_P500013  | Anpep     | alanyl (membrane) aminopeptidase                                                           | 4.76E-02 | 2.27 | 1.28E-02 | 1.81 | 5.82E-02 | -1.25 | 6.06E-01 |
| A_44_P874677  | Tmem252   | transmembrane protein 252                                                                  | 4.17E-03 | 2.27 | 3.25E-04 | 1.24 | 3.23E-01 | -1.82 | 3.03E-03 |
| A_44_P366723  | Igf1      | insulin-like growth factor 1                                                               | 1.74E-02 | 2.26 | 2.34E-03 | 1.63 | 4.67E-02 | -1.39 | 2.06E-01 |
| A_44_P1053404 | Fcgr1g    | Fc fragment of IgE, high affinity I, receptor for; gamma polypeptide                       | 6.40E-03 | 2.26 | 4.65E-04 | 1.57 | 2.59E-02 | -1.44 | 7.22E-02 |
| A_42_P794130  | Cdc20     | cell division cycle 20 homolog ( <i>S. cerevisiae</i> )                                    | 7.98E-04 | 2.25 | 9.26E-06 | 1.45 | 7.33E-03 | -1.55 | 1.98E-03 |
| A_44_P323106  | Abca1     | ATP-binding cassette, subfamily A (ABC1), member 1                                         | 3.31E-02 | 2.24 | 6.74E-03 | 1.71 | 5.68E-02 | -1.31 | 4.11E-01 |
| A_64_P129279  | Fcgr1a    | Fc fragment of IgG, high affinity Ia, receptor (CD64)                                      | 5.05E-03 | 2.24 | 3.14E-04 | 1.50 | 3.45E-02 | -1.50 | 3.53E-02 |
| A_44_P426107  | Akr1b8    | aldo-keto reductase family 1, member B8                                                    | 1.89E-03 | 2.24 | 9.10E-05 | 1.21 | 3.05E-01 | -1.85 | 7.61E-04 |
| A_64_P093184  | Col15a1   | collagen, type XV, alpha 1                                                                 | 5.61E-03 | 2.24 | 3.69E-04 | 1.50 | 3.61E-02 | -1.49 | 4.04E-02 |
| A_64_P087801  | St14      | suppression of tumorigenicity 14 (colon carcinoma)                                         | 6.25E-03 | 2.23 | 4.40E-04 | 1.53 | 3.16E-02 | -1.46 | 5.61E-02 |
| A_42_P576953  | Pla1a     | phospholipase A1 member A                                                                  | 2.62E-03 | 2.23 | 1.13E-04 | 1.34 | 8.97E-02 | -1.66 | 3.92E-03 |

|               |           |                                                                       |          |      |          |      |          |       |          |
|---------------|-----------|-----------------------------------------------------------------------|----------|------|----------|------|----------|-------|----------|
| A_64_P031691  | Actg2     | actin, gamma 2, smooth muscle, enteric                                | 5.28E-03 | 2.23 | 4.92E-04 | 1.23 | 3.73E-01 | -1.81 | 3.96E-03 |
| A_44_P464502  | Gfap      | glial fibrillary acidic protein                                       | 1.14E-02 | 2.22 | 1.24E-03 | 1.63 | 2.77E-02 | -1.37 | 1.81E-01 |
| A_64_P016357  | Fcer1g    | Fc fragment of IgE, high affinity I, receptor for; gamma polypeptide  | 7.96E-03 | 2.22 | 6.69E-04 | 1.57 | 2.90E-02 | -1.42 | 9.50E-02 |
| A_44_P212964  | Plac8     | placenta-specific 8                                                   | 3.28E-02 | 2.22 | 5.96E-03 | 1.57 | 1.01E-01 | -1.41 | 2.38E-01 |
| A_64_P107106  | Hmgb2     | high mobility group box 2                                             | 4.35E-04 | 2.22 | 3.37E-06 | 1.29 | 3.32E-02 | -1.71 | 1.28E-04 |
| A_64_P098454  | Fermt3    | fermitin family member 3                                              | 2.03E-03 | 2.21 | 6.47E-05 | 1.44 | 2.21E-02 | -1.53 | 8.42E-03 |
| A_64_P123622  | Ly86      | lymphocyte antigen 86                                                 | 1.20E-02 | 2.21 | 1.28E-03 | 1.58 | 3.91E-02 | -1.40 | 1.38E-01 |
| A_64_P052740  | Igf1      | insulin-like growth factor 1                                          | 2.18E-02 | 2.21 | 3.24E-03 | 1.58 | 6.53E-02 | -1.40 | 2.05E-01 |
| A_44_P681660  | Fn1       | fibronectin 1                                                         | 1.30E-03 | 2.21 | 2.77E-05 | 1.44 | 1.42E-02 | -1.54 | 4.45E-03 |
| A_44_P105225  | Loxl2     | lysyl oxidase-like 2                                                  | 3.73E-03 | 2.20 | 1.94E-04 | 1.42 | 5.13E-02 | -1.56 | 1.35E-02 |
| A_64_P124249  | LOC690976 | similar to Calponin-2 (Calponin H2, smooth muscle) (Neutral calponin) | 1.86E-03 | 2.20 | 5.58E-05 | 1.42 | 2.64E-02 | -1.56 | 5.85E-03 |
| A_64_P052626  | Msn       | moesin                                                                | 8.75E-03 | 2.20 | 7.68E-04 | 1.44 | 7.97E-02 | -1.53 | 4.07E-02 |
| A_42_P824217  | Dapp1     | dual adaptor of phosphotyrosine and 3-phosphoinositides               | 9.21E-03 | 2.20 | 8.32E-04 | 1.54 | 3.83E-02 | -1.43 | 9.15E-02 |
| A_44_P1042876 | Hspa1b    | heat shock 70kD protein 1B (mapped)                                   | 4.66E-03 | 2.19 | 2.75E-04 | 1.46 | 3.83E-02 | -1.50 | 2.73E-02 |
| A_64_P110690  | Unc93b1   | unc-93 homolog B1 (C. elegans)                                        | 1.86E-02 | 2.18 | 2.82E-03 | 1.67 | 3.17E-02 | -1.30 | 3.29E-01 |
| A_44_P879764  | B4galt1   | UDP-Gal:betaGlcNAc beta 1,4-galactosyltransferase, polypeptide 1      | 3.53E-03 | 2.18 | 1.76E-04 | 1.41 | 4.90E-02 | -1.55 | 1.26E-02 |
| A_64_P241649  | Cd300a    | Cd300a molecule                                                       | 5.38E-03 | 2.18 | 3.52E-04 | 1.55 | 1.99E-02 | -1.41 | 6.86E-02 |
| A_64_P157371  | Pdpn      | podoplanin                                                            | 1.78E-02 | 2.17 | 2.39E-03 | 1.38 | 1.88E-01 | -1.57 | 5.31E-02 |
| A_44_P1039249 | Dok3      | docking protein 3                                                     | 4.76E-03 | 2.17 | 2.88E-04 | 1.42 | 5.34E-02 | -1.53 | 2.06E-02 |

|               |           |                                                                 |          |      |          |      |          |       |          |
|---------------|-----------|-----------------------------------------------------------------|----------|------|----------|------|----------|-------|----------|
| A_64_P083600  | Fxyd5     | FXYP domain-containing ion transport regulator 5                | 2.47E-03 | 2.16 | 9.42E-05 | 1.38 | 4.53E-02 | -1.56 | 6.45E-03 |
| A_64_P141420  | Serpinb1a | serine (or cysteine) proteinase inhibitor, clade B, member 1a   | 5.97E-03 | 2.16 | 4.08E-04 | 1.47 | 4.17E-02 | -1.47 | 3.93E-02 |
| A_64_P107105  |           |                                                                 | 4.09E-04 | 2.15 | 2.94E-06 | 1.27 | 3.56E-02 | -1.69 | 1.01E-04 |
| A_64_P048720  | Dnase2    | deoxyribonuclease II, lysosomal                                 | 6.18E-03 | 2.15 | 4.37E-04 | 1.52 | 2.67E-02 | -1.42 | 6.56E-02 |
| A_64_P123346  | Xdh       | xanthine dehydrogenase                                          | 4.84E-03 | 2.15 | 3.57E-04 | 1.28 | 1.97E-01 | -1.67 | 6.24E-03 |
| A_64_P100963  | Ncaph     | non-SMC condensin I complex, subunit H                          | 4.74E-03 | 2.15 | 3.00E-04 | 1.36 | 8.81E-02 | -1.57 | 1.27E-02 |
| A_64_P008091  | Slc15a3   | solute carrier family 15, member 3                              | 3.37E-02 | 2.15 | 6.27E-03 | 1.56 | 9.15E-02 | -1.37 | 2.70E-01 |
| A_64_P013226  | Lsp1      | lymphocyte-specific protein 1                                   | 2.00E-02 | 2.14 | 2.85E-03 | 1.56 | 5.81E-02 | -1.37 | 2.03E-01 |
| A_44_P515852  | Tpx2      | TPX2, microtubule-associated, homolog ( <i>Xenopus laevis</i> ) | 2.66E-03 | 2.14 | 1.25E-04 | 1.29 | 1.32E-01 | -1.66 | 2.93E-03 |
| A_64_P041526  | Hmgb2     | high mobility group box 2                                       | 6.71E-04 | 2.14 | 7.53E-06 | 1.32 | 2.61E-02 | -1.62 | 4.52E-04 |
| A_44_P248133  | Tagln2    | transgelin 2                                                    | 1.10E-02 | 2.14 | 1.10E-03 | 1.41 | 1.00E-01 | -1.51 | 4.67E-02 |
| A_42_P508984  | Pf4       | platelet factor 4                                               | 3.97E-02 | 2.14 | 8.03E-03 | 1.56 | 1.05E-01 | -1.37 | 2.94E-01 |
| A_42_P814235  | P2ry6     | pyrimidineric receptor P2Y, G-protein coupled, 6                | 1.78E-02 | 2.14 | 2.43E-03 | 1.58 | 4.63E-02 | -1.35 | 2.14E-01 |
| A_44_P1053321 | Gbp2      | guanylate binding protein 2, interferon-inducible               | 2.00E-03 | 2.13 | 6.22E-05 | 1.48 | 1.10E-02 | -1.44 | 1.62E-02 |
| A_44_P1030098 | Cdc45     | cell division cycle 45 homolog ( <i>S. cerevisiae</i> )         | 5.83E-04 | 2.13 | 5.51E-06 | 1.33 | 1.95E-02 | -1.61 | 3.92E-04 |
| A_44_P144741  | Blnk      | B-cell linker                                                   | 2.67E-03 | 2.13 | 1.04E-04 | 1.42 | 2.96E-02 | -1.51 | 1.13E-02 |
| A_44_P486312  | Fmo2      | flavin containing monooxygenase 2                               | 1.92E-02 | 2.13 | 4.15E-03 | 1.16 | 6.92E-01 | -1.83 | 1.40E-02 |
| A_42_P591344  | Itgb2     | integrin, beta 2                                                | 3.74E-02 | 2.13 | 8.86E-03 | 1.72 | 4.76E-02 | -1.24 | 5.51E-01 |
| A_64_P110941  | Cndp1     | carnosine dipeptidase 1 (metallopeptidase M20 family)           | 2.64E-03 | 2.12 | 1.01E-04 | 1.46 | 1.79E-02 | -1.46 | 1.79E-02 |

|               |              |                                                                                          |          |      |          |      |          |       |          |
|---------------|--------------|------------------------------------------------------------------------------------------|----------|------|----------|------|----------|-------|----------|
| A_64_P019719  | Srpx2        | sushi-repeat-containing protein, X-linked 2                                              | 1.84E-03 | 2.12 | 5.81E-05 | 1.35 | 4.72E-02 | -1.57 | 3.42E-03 |
| A_64_P015549  | Lyl1         | lymphoblastic leukemia derived sequence 1                                                | 9.05E-04 | 2.11 | 1.23E-05 | 1.39 | 1.12E-02 | -1.52 | 1.93E-03 |
| A_43_P10641   | Mgst2        | microsomal glutathione S-transferase 2                                                   | 7.27E-03 | 2.11 | 5.65E-04 | 1.43 | 5.83E-02 | -1.47 | 4.01E-02 |
| A_42_P759993  | Mefv         | Mediterranean fever                                                                      | 2.72E-02 | 2.11 | 4.48E-03 | 1.54 | 7.93E-02 | -1.37 | 2.30E-01 |
| A_64_P136909  | Cxcl16       | chemokine (C-X-C motif) ligand 16                                                        | 6.82E-03 | 2.11 | 5.08E-04 | 1.45 | 4.57E-02 | -1.45 | 4.56E-02 |
| A_44_P182020  | Psmb8        | proteasome (prosome, macropain) subunit, beta type 8 (large multifunctional peptidase 7) | 1.09E-02 | 2.10 | 1.09E-03 | 1.50 | 4.36E-02 | -1.39 | 1.06E-01 |
| A_64_P047527  | Grn          | granulin                                                                                 | 6.17E-03 | 2.10 | 4.36E-04 | 1.50 | 2.51E-02 | -1.39 | 6.93E-02 |
| A_64_P068473  |              |                                                                                          | 5.14E-03 | 2.10 | 3.64E-04 | 1.31 | 1.38E-01 | -1.60 | 9.67E-03 |
| A_44_P1028858 | Grn          | granulin                                                                                 | 4.09E-03 | 2.10 | 2.18E-04 | 1.49 | 1.92E-02 | -1.41 | 4.18E-02 |
| A_64_P055994  | Tacc3        | transforming, acidic coiled-coil containing protein 3                                    | 2.66E-03 | 2.09 | 1.03E-04 | 1.48 | 1.31E-02 | -1.42 | 2.52E-02 |
| A_64_P080025  | Serping1     | serpin peptidase inhibitor, clade G (C1 inhibitor), member 1                             | 3.45E-03 | 2.09 | 1.70E-04 | 1.37 | 5.42E-02 | -1.52 | 1.09E-02 |
| A_64_P019790  | Cyp2d1       | cytochrome P450, family 2, subfamily d, polypeptide 1                                    | 4.59E-02 | 2.08 | 9.68E-03 | 1.40 | 2.40E-01 | -1.48 | 1.57E-01 |
| A_64_P023472  | Serpinb1a    | serine (or cysteine) proteinase inhibitor, clade B, member 1a                            | 8.65E-03 | 2.08 | 7.52E-04 | 1.47 | 4.46E-02 | -1.42 | 7.12E-02 |
| A_64_P051121  | Pdpn         | podoplanin                                                                               | 1.91E-02 | 2.08 | 2.55E-03 | 1.46 | 9.50E-02 | -1.43 | 1.16E-01 |
| A_64_P162760  | LOC100362769 | hypothetical protein LOC100362769                                                        | 4.27E-03 | 2.07 | 2.50E-04 | 1.35 | 7.93E-02 | -1.54 | 1.15E-02 |
| A_44_P161233  | Il18         | interleukin 18                                                                           | 6.42E-03 | 2.07 | 4.75E-04 | 1.37 | 8.68E-02 | -1.51 | 2.18E-02 |
| A_44_P520859  | Pkmyt1       | protein kinase, membrane associated tyrosine/threonine 1                                 | 8.36E-04 | 2.06 | 1.13E-05 | 1.35 | 1.59E-02 | -1.53 | 1.23E-03 |
| A_44_P653701  | Mybl2        | myeloblastosis oncogene-like 2                                                           | 2.61E-03 | 2.06 | 9.81E-05 | 1.42 | 2.10E-02 | -1.45 | 1.48E-02 |
| A_43_P11448   | Cp           | ceruloplasmin (ferroxidase)                                                              | 2.61E-03 | 2.06 | 1.08E-04 | 1.32 | 7.36E-02 | -1.56 | 4.62E-03 |

|              |          |                                                                              |          |      |          |      |          |       |          |
|--------------|----------|------------------------------------------------------------------------------|----------|------|----------|------|----------|-------|----------|
| A_42_P506685 | Fxyd2    | FXYD domain-containing ion transport regulator 2                             | 4.31E-03 | 2.06 | 2.40E-04 | 1.42 | 3.52E-02 | -1.45 | 2.55E-02 |
| A_44_P236761 | Rasal3   | RAS protein activator like 3                                                 | 1.99E-02 | 2.06 | 2.93E-03 | 1.56 | 4.65E-02 | -1.32 | 2.51E-01 |
| A_64_P144944 | Dab2     | disabled 2, mitogen-responsive phosphoprotein                                | 2.77E-04 | 2.05 | 1.12E-06 | 1.21 | 5.02E-02 | -1.69 | 2.21E-05 |
| A_64_P156947 | Mms22l   | MMS22-like, DNA repair protein                                               | 4.41E-03 | 2.04 | 2.52E-04 | 1.38 | 5.40E-02 | -1.48 | 1.74E-02 |
| A_64_P155950 |          |                                                                              | 9.30E-04 | 2.04 | 1.50E-05 | 1.30 | 3.47E-02 | -1.57 | 8.37E-04 |
| A_44_P378799 | Igfbp6   | insulin-like growth factor binding protein 6                                 | 8.35E-04 | 2.03 | 2.76E-05 | 1.10 | 6.17E-01 | -1.85 | 7.43E-05 |
| A_64_P048049 | Pdlim7   | PDZ and LIM domain 7                                                         | 1.47E-03 | 2.03 | 3.69E-05 | 1.36 | 2.13E-02 | -1.49 | 4.29E-03 |
| A_44_P276338 | Mcm6     | minichromosome maintenance complex component 6                               | 4.86E-03 | 2.03 | 3.23E-04 | 1.31 | 1.14E-01 | -1.55 | 1.05E-02 |
| A_64_P038887 | Cdca7l   | cell division cycle associated 7 like                                        | 5.63E-03 | 2.03 | 3.85E-04 | 1.35 | 7.85E-02 | -1.50 | 1.91E-02 |
| A_42_P598934 | Lrrfip1  | leucine rich repeat (in FLII) interacting protein 1                          | 8.65E-03 | 2.02 | 7.56E-04 | 1.46 | 3.98E-02 | -1.38 | 7.99E-02 |
| A_44_P149476 | Lrch4    | leucine-rich repeats and calponin homology (CH) domain containing 4          | 4.54E-03 | 2.02 | 2.62E-04 | 1.42 | 3.18E-02 | -1.42 | 3.13E-02 |
| A_44_P293904 | Syk      | spleen tyrosine kinase                                                       | 2.17E-02 | 2.02 | 3.29E-03 | 1.53 | 5.40E-02 | -1.32 | 2.45E-01 |
| A_44_P297777 | Flna     | filamin A, alpha                                                             | 1.01E-03 | 2.02 | 1.71E-05 | 1.32 | 2.62E-02 | -1.53 | 1.30E-03 |
| A_64_P022155 | Slc2a5   | solute carrier family 2 (facilitated glucose/fructose transporter), member 5 | 6.33E-03 | 2.01 | 4.46E-04 | 1.42 | 4.39E-02 | -1.42 | 4.11E-02 |
| A_43_P19763  | Tlr2     | toll-like receptor 2                                                         | 2.70E-02 | 2.01 | 4.73E-03 | 1.56 | 5.39E-02 | -1.29 | 3.29E-01 |
| A_44_P301608 | Ucp2     | uncoupling protein 2 (mitochondrial, proton carrier)                         | 2.17E-03 | 2.01 | 7.77E-05 | 1.33 | 4.72E-02 | -1.51 | 4.88E-03 |
| A_44_P513385 | Dab2     | disabled 2, mitogen-responsive phosphoprotein                                | 2.98E-04 | 2.01 | 1.37E-06 | 1.21 | 5.03E-02 | -1.66 | 2.84E-05 |
| A_43_P15259  | Tnfrsf1a | tumor necrosis factor receptor superfamily, member 1a                        | 5.14E-03 | 2.01 | 3.24E-04 | 1.42 | 3.53E-02 | -1.42 | 3.58E-02 |
| A_43_P13102  | Ada      | adenosine deaminase                                                          | 6.89E-04 | 2.00 | 1.22E-05 | 1.17 | 2.02E-01 | -1.71 | 1.16E-04 |

|              |                |                                                    |          |      |          |      |          |       |          |
|--------------|----------------|----------------------------------------------------|----------|------|----------|------|----------|-------|----------|
| A_64_P155186 | Aurka          | aurora kinase A                                    | 1.78E-03 | 2.00 | 5.34E-05 | 1.33 | 3.82E-02 | -1.51 | 3.81E-03 |
| A_43_P19799  | RGD156322<br>2 | similar to RIKEN cDNA A930018P22                   | 3.64E-03 | 2.00 | 1.84E-04 | 1.37 | 4.49E-02 | -1.47 | 1.46E-02 |
| A_42_P762829 | Cebpd          | CCAAT/enhancer binding protein (C/EBP), delta      | 1.74E-02 | 2.00 | 2.29E-03 | 1.49 | 5.53E-02 | -1.34 | 1.74E-01 |
| A_42_P522899 | Tgfb1          | transforming growth factor, beta 1                 | 1.48E-02 | 2.00 | 1.72E-03 | 1.42 | 8.10E-02 | -1.41 | 9.27E-02 |
| A_64_P048887 | Slfn2          | schlafen 2                                         | 5.08E-03 | 2.00 | 3.21E-04 | 1.45 | 2.45E-02 | -1.38 | 5.08E-02 |
| A_43_P14915  | C6             | complement component 6                             | 2.06E-02 | 1.99 | 3.01E-03 | 1.51 | 5.63E-02 | -1.32 | 2.19E-01 |
| A_64_P139173 | Cd40           | CD40 molecule, TNF receptor superfamily member 5   | 9.16E-03 | 1.99 | 8.19E-04 | 1.44 | 4.43E-02 | -1.38 | 7.84E-02 |
| A_42_P601014 | Cmtm7          | CKLF-like MARVEL transmembrane domain containing 7 | 1.28E-02 | 1.99 | 1.41E-03 | 1.48 | 4.44E-02 | -1.35 | 1.34E-01 |
| A_64_P032574 | Hk2            | hexokinase 2                                       | 5.38E-03 | 1.99 | 3.48E-04 | 1.37 | 5.57E-02 | -1.45 | 2.44E-02 |
| A_64_P038414 | Lox            | lysyl oxidase                                      | 2.84E-03 | 1.99 | 1.75E-04 | 1.19 | 3.11E-01 | -1.67 | 1.57E-03 |
| A_64_P062110 | RT1-DMb        | RT1 class II, locus DMb                            | 2.30E-02 | 1.99 | 3.53E-03 | 1.50 | 6.47E-02 | -1.33 | 2.23E-01 |
| A_64_P062742 |                |                                                    | 2.03E-02 | 1.98 | 3.17E-03 | 1.56 | 3.77E-02 | -1.27 | 3.15E-01 |
| A_42_P527141 | Foxm1          | forkhead box M1                                    | 1.72E-03 | 1.98 | 5.11E-05 | 1.31 | 4.30E-02 | -1.51 | 3.20E-03 |
| A_64_P121936 | Clec4a1        | C-type lectin domain family 4, member A1           | 2.66E-02 | 1.98 | 4.67E-03 | 1.55 | 5.09E-02 | -1.28 | 3.40E-01 |
| A_42_P588944 | Mgp            | matrix Gla protein                                 | 6.89E-04 | 1.98 | 1.05E-05 | 1.20 | 1.16E-01 | -1.64 | 1.69E-04 |
| A_44_P258008 | Fgd2           | FYVE, RhoGEF and PH domain containing 2            | 2.20E-02 | 1.98 | 3.33E-03 | 1.50 | 5.83E-02 | -1.32 | 2.32E-01 |
| A_64_P120432 | Hmha1          | histocompatibility (minor) HA-1                    | 5.31E-03 | 1.98 | 3.39E-04 | 1.42 | 3.27E-02 | -1.40 | 4.06E-02 |
| A_64_P130983 | Aif1           | allograft inflammatory factor 1                    | 5.45E-03 | 1.98 | 3.53E-04 | 1.39 | 4.57E-02 | -1.43 | 3.05E-02 |
| A_44_P113933 | Tyms           | thymidylate synthetase                             | 1.26E-03 | 1.98 | 3.16E-05 | 1.26 | 7.40E-02 | -1.57 | 1.02E-03 |

|               |          |                                                           |          |      |          |      |          |       |          |
|---------------|----------|-----------------------------------------------------------|----------|------|----------|------|----------|-------|----------|
| A_42_P666951  | Cd40     | CD40 molecule, TNF receptor superfamily member 5          | 5.63E-03 | 1.97 | 3.71E-04 | 1.41 | 3.80E-02 | -1.40 | 3.87E-02 |
| A_44_P1050480 | Ecm1     | extracellular matrix protein 1                            | 1.45E-03 | 1.97 | 4.33E-05 | 1.24 | 1.03E-01 | -1.59 | 1.07E-03 |
| A_44_P487761  | C1qa     | complement component 1, q subcomponent, A chain           | 4.65E-03 | 1.97 | 2.75E-04 | 1.44 | 2.07E-02 | -1.36 | 5.04E-02 |
| A_44_P856007  | Iqgap1   | IQ motif containing GTPase activating protein 1           | 4.11E-03 | 1.97 | 2.20E-04 | 1.37 | 4.07E-02 | -1.44 | 1.98E-02 |
| A_44_P178519  | Adamts7  | ADAM metallopeptidase with thrombospondin type 1 motif, 7 | 3.05E-04 | 1.97 | 1.21E-06 | 1.30 | 6.36E-03 | -1.51 | 1.37E-04 |
| A_43_P12172   | Lgmn     | legumain                                                  | 1.13E-02 | 1.97 | 1.13E-03 | 1.38 | 8.69E-02 | -1.43 | 5.61E-02 |
| A_64_P137386  | Tlr13    | toll-like receptor 13                                     | 1.50E-02 | 1.97 | 1.87E-03 | 1.50 | 3.91E-02 | -1.31 | 1.96E-01 |
| A_64_P086148  | Jak3     | Janus kinase 3                                            | 3.86E-03 | 1.96 | 2.02E-04 | 1.36 | 4.21E-02 | -1.44 | 1.73E-02 |
| A_44_P458878  | Tcf19    | transcription factor 19                                   | 2.81E-03 | 1.96 | 1.23E-04 | 1.30 | 6.87E-02 | -1.50 | 5.77E-03 |
| A_44_P592221  | Sox7     | SRY (sex determining region Y)-box 7                      | 1.58E-02 | 1.96 | 1.93E-03 | 1.35 | 1.33E-01 | -1.44 | 6.25E-02 |
| A_44_P920712  | Dock8    | dedicator of cytokinesis 8                                | 1.95E-02 | 1.96 | 2.75E-03 | 1.48 | 5.49E-02 | -1.32 | 2.07E-01 |
| A_42_P826115  | Sapcd2   | suppressor APC domain containing 2                        | 8.36E-04 | 1.96 | 1.15E-05 | 1.31 | 1.90E-02 | -1.49 | 1.06E-03 |
| A_44_P1023801 | Kif23    | kinesin family member 23                                  | 1.73E-03 | 1.95 | 5.34E-05 | 1.29 | 5.19E-02 | -1.51 | 2.80E-03 |
| A_44_P354078  | Hist1h1a | histone cluster 1, H1a                                    | 1.62E-03 | 1.93 | 5.53E-05 | 1.23 | 1.18E-01 | -1.57 | 1.24E-03 |
| A_64_P012061  | Bmp7     | bone morphogenetic protein 7                              | 2.77E-04 | 1.93 | 9.35E-07 | 1.26 | 1.14E-02 | -1.54 | 5.86E-05 |
| A_64_P023587  | Ly96     | lymphocyte antigen 96                                     | 1.30E-03 | 1.93 | 2.81E-05 | 1.36 | 1.28E-02 | -1.42 | 5.04E-03 |
| A_64_P030689  | Cd8b     | CD8b molecule                                             | 1.27E-02 | 1.93 | 1.59E-03 | 1.54 | 2.13E-02 | -1.25 | 2.80E-01 |
| A_64_P125883  | Socs3    | suppressor of cytokine signaling 3                        | 7.76E-04 | 1.93 | 9.10E-06 | 1.32 | 1.17E-02 | -1.46 | 1.23E-03 |
| A_44_P1039128 | Cxcl10   | chemokine (C-X-C motif) ligand 10                         | 2.36E-02 | 1.92 | 3.52E-03 | 1.37 | 1.44E-01 | -1.41 | 1.05E-01 |



|              |         |                                                                                     |          |      |          |      |          |       |          |
|--------------|---------|-------------------------------------------------------------------------------------|----------|------|----------|------|----------|-------|----------|
| A_44_P175364 | Mafb    | v-maf musculoaponeurotic fibrosarcoma oncogene homolog B (avian)                    | 1.17E-02 | 1.92 | 1.21E-03 | 1.41 | 5.58E-02 | -1.36 | 9.34E-02 |
| A_64_P132576 | Ccl9    | chemokine (C-C motif) ligand 9                                                      | 5.26E-03 | 1.91 | 3.34E-04 | 1.39 | 3.20E-02 | -1.37 | 4.08E-02 |
| A_64_P047714 | Aif1    | allograft inflammatory factor 1                                                     | 1.00E-02 | 1.91 | 9.43E-04 | 1.42 | 4.54E-02 | -1.35 | 8.85E-02 |
| A_44_P499309 | Piezo1  | piezo-type mechanosensitive ion channel component 1                                 | 2.53E-02 | 1.91 | 4.05E-03 | 1.46 | 7.41E-02 | -1.31 | 2.24E-01 |
| A_44_P466118 | Slc11a1 | solute carrier family 11 (proton-coupled divalent metal ion transporters), member 1 | 1.61E-02 | 1.90 | 1.97E-03 | 1.35 | 1.18E-01 | -1.41 | 7.26E-02 |
| A_44_P175530 | Plek    | pleckstrin                                                                          | 1.14E-02 | 1.90 | 1.15E-03 | 1.37 | 7.73E-02 | -1.39 | 6.41E-02 |
| A_64_P067884 | Trim47  | tripartite motif-containing 47                                                      | 4.57E-02 | 1.90 | 9.61E-03 | 1.35 | 2.36E-01 | -1.41 | 1.59E-01 |
| A_64_P041797 | Hspb9   | heat shock protein, alpha-crystallin-related, B9                                    | 9.82E-03 | 1.90 | 1.37E-03 | 1.16 | 5.11E-01 | -1.63 | 7.57E-03 |
| A_42_P457783 | Tifab   | TRAF-interacting protein with forkhead-associated domain, family member B           | 7.52E-03 | 1.90 | 5.95E-04 | 1.39 | 4.12E-02 | -1.36 | 6.00E-02 |
| A_43_P13111  | Skap2   | src kinase associated phosphoprotein 2                                              | 6.82E-03 | 1.90 | 5.11E-04 | 1.40 | 3.52E-02 | -1.35 | 5.95E-02 |
| A_64_P027048 | Mcm2    | minichromosome maintenance complex component 2                                      | 1.01E-03 | 1.89 | 1.91E-05 | 1.24 | 5.65E-02 | -1.52 | 7.11E-04 |
| A_42_P809575 | Klhl30  | kelch-like 30 (Drosophila)                                                          | 9.88E-04 | 1.89 | 1.50E-05 | 1.34 | 9.73E-03 | -1.41 | 2.87E-03 |
| A_64_P009265 | Ugt1a6  | UDP glucuronosyltransferase 1 family, polypeptide A6                                | 2.12E-02 | 1.89 | 3.30E-03 | 1.49 | 4.41E-02 | -1.26 | 2.89E-01 |
| A_64_P137075 | Col7a1  | collagen, type VII, alpha 1                                                         | 4.84E-03 | 1.89 | 3.73E-04 | 1.22 | 2.35E-01 | -1.55 | 5.31E-03 |
| A_64_P001401 | Tinagl1 | tubulointerstitial nephritis antigen-like 1                                         | 8.75E-03 | 1.89 | 1.39E-03 | 1.12 | 6.70E-01 | -1.68 | 4.65E-03 |
| A_64_P056537 | Dscc1   | defective in sister chromatid cohesion 1 homolog (S. cerevisiae)                    | 7.15E-03 | 1.88 | 5.52E-04 | 1.40 | 3.34E-02 | -1.34 | 6.79E-02 |
| A_42_P520349 | Clec10a | C-type lectin domain family 10, member A                                            | 2.47E-02 | 1.88 | 3.95E-03 | 1.29 | 2.50E-01 | -1.46 | 6.34E-02 |
| A_64_P144492 | Mall    | mal, T-cell differentiation protein-like                                            | 4.66E-03 | 1.88 | 4.25E-04 | 1.17 | 4.05E-01 | -1.61 | 2.98E-03 |
| A_44_P193945 | Bst1    | bone marrow stromal cell antigen 1                                                  | 3.53E-02 | 1.88 | 6.81E-03 | 1.46 | 8.95E-02 | -1.29 | 2.93E-01 |

|              |            |                                                                                          |          |      |          |      |          |       |          |
|--------------|------------|------------------------------------------------------------------------------------------|----------|------|----------|------|----------|-------|----------|
| A_64_P310726 | Ly96       | lymphocyte antigen 96                                                                    | 7.96E-03 | 1.88 | 6.55E-04 | 1.40 | 3.90E-02 | -1.34 | 7.02E-02 |
| A_64_P034414 | Tnf        | tumor necrosis factor                                                                    | 1.20E-03 | 1.88 | 4.41E-05 | 1.14 | 3.44E-01 | -1.65 | 2.84E-04 |
| A_64_P114913 | Vwf        | von Willebrand factor                                                                    | 6.60E-03 | 1.88 | 6.72E-04 | 1.19 | 3.61E-01 | -1.58 | 5.87E-03 |
| A_44_P518127 | Wwtr1      | WW domain containing transcription regulator 1                                           | 1.26E-02 | 1.88 | 1.44E-03 | 1.28 | 1.82E-01 | -1.46 | 3.23E-02 |
| A_44_P283941 | Arhgdib    | Rho, GDP dissociation inhibitor (GDI) beta                                               | 7.20E-03 | 1.88 | 5.58E-04 | 1.40 | 3.38E-02 | -1.34 | 6.79E-02 |
| A_64_P082758 | Abi3       | ABI family, member 3                                                                     | 3.56E-03 | 1.87 | 1.74E-04 | 1.39 | 1.87E-02 | -1.35 | 3.29E-02 |
| A_44_P301963 | Psmb9      | proteasome (prosome, macropain) subunit, beta type 9 (large multifunctional peptidase 2) | 4.66E-03 | 1.87 | 2.76E-04 | 1.34 | 4.61E-02 | -1.40 | 2.28E-02 |
| A_43_P12384  | Birc3      | baculoviral IAP repeat-containing 3                                                      | 3.75E-02 | 1.87 | 8.04E-03 | 1.51 | 6.59E-02 | -1.24 | 4.19E-01 |
| A_64_P033380 | Tcirg1     | T-cell, immune regulator 1, ATPase, H+ transporting, lysosomal V0 subunit A3             | 4.55E-03 | 1.86 | 2.65E-04 | 1.39 | 2.25E-02 | -1.34 | 4.46E-02 |
| A_64_P068622 | Hist1h2ail | histone cluster 1, H2ai-like                                                             | 1.86E-03 | 1.86 | 6.71E-05 | 1.23 | 1.07E-01 | -1.51 | 1.75E-03 |
| A_64_P222609 | C2         | complement component 2                                                                   | 1.42E-02 | 1.86 | 1.61E-03 | 1.39 | 6.77E-02 | -1.34 | 1.03E-01 |
| A_64_P115772 |            |                                                                                          | 6.07E-03 | 1.86 | 4.17E-04 | 1.36 | 4.49E-02 | -1.37 | 3.73E-02 |
| A_64_P012626 |            |                                                                                          | 1.29E-02 | 1.86 | 1.43E-03 | 1.41 | 4.83E-02 | -1.32 | 1.27E-01 |
| A_64_P015462 | Sp140      | SP140 nuclear body protein                                                               | 4.19E-03 | 1.86 | 2.28E-04 | 1.35 | 3.64E-02 | -1.38 | 2.32E-02 |
| A_44_P468258 | Casp1      | caspase 1                                                                                | 5.75E-03 | 1.86 | 3.83E-04 | 1.36 | 4.11E-02 | -1.37 | 3.71E-02 |
| A_64_P099923 | Dap        | death-associated protein                                                                 | 4.99E-03 | 1.85 | 3.14E-04 | 1.31 | 6.41E-02 | -1.41 | 1.88E-02 |
| A_42_P818546 | Fhod1      | formin homology 2 domain containing 1                                                    | 1.24E-03 | 1.85 | 2.59E-05 | 1.32 | 1.53E-02 | -1.41 | 3.77E-03 |
| A_64_P031745 | Ptpn18     | protein tyrosine phosphatase, non-receptor type 18                                       | 3.46E-03 | 1.85 | 1.72E-04 | 1.30 | 5.55E-02 | -1.42 | 1.08E-02 |
| A_44_P180229 | Rasa4      | RAS p21 protein activator 4                                                              | 4.36E-02 | 1.85 | 9.18E-03 | 1.43 | 1.15E-01 | -1.29 | 3.01E-01 |

|               |           |                                                             |          |      |          |      |          |       |          |
|---------------|-----------|-------------------------------------------------------------|----------|------|----------|------|----------|-------|----------|
| A_64_P105231  | Myl12a    | myosin, light chain 12A, regulatory, non-sarcomeric         | 3.05E-04 | 1.85 | 1.20E-06 | 1.25 | 1.10E-02 | -1.48 | 8.42E-05 |
| A_64_P025630  | Ugt1a6    | UDP glucuronosyltransferase 1 family, polypeptide A6        | 1.41E-02 | 1.85 | 1.65E-03 | 1.43 | 4.31E-02 | -1.29 | 1.61E-01 |
| A_42_P480224  | Gpd1      | glycerol-3-phosphate dehydrogenase 1 (soluble)              | 1.21E-02 | 1.84 | 1.97E-03 | 1.15 | 5.75E-01 | -1.61 | 9.10E-03 |
| A_64_P022615  | Vamp5     | vesicle-associated membrane protein 5                       | 1.65E-03 | 1.84 | 5.61E-05 | 1.22 | 1.10E-01 | -1.51 | 1.36E-03 |
| A_44_P1037041 | Map3k6    | mitogen-activated protein kinase kinase kinase 6            | 4.98E-03 | 1.84 | 4.63E-04 | 1.16 | 3.95E-01 | -1.58 | 3.41E-03 |
| A_64_P113443  | Cdk6      | cyclin-dependent kinase 6                                   | 2.43E-03 | 1.84 | 9.78E-05 | 1.26 | 7.38E-02 | -1.46 | 4.07E-03 |
| A_42_P501679  |           |                                                             | 1.18E-03 | 1.84 | 2.45E-05 | 1.28 | 2.59E-02 | -1.44 | 2.09E-03 |
| A_44_P463980  |           |                                                             | 3.07E-03 | 1.84 | 1.37E-04 | 1.31 | 4.15E-02 | -1.40 | 1.11E-02 |
| A_42_P614692  | Oplah     | 5-oxoprolinase (ATP-hydrolysing)                            | 1.01E-03 | 1.84 | 1.73E-05 | 1.26 | 3.03E-02 | -1.46 | 1.15E-03 |
| A_42_P653257  | Ptpn7     | protein tyrosine phosphatase, non-receptor type 7           | 2.26E-02 | 1.84 | 3.30E-03 | 1.36 | 1.18E-01 | -1.35 | 1.21E-01 |
| A_64_P034064  | Mrgprx3   | MAS-related GPR, member X3                                  | 2.13E-02 | 1.84 | 3.41E-03 | 1.48 | 4.02E-02 | -1.24 | 3.18E-01 |
| A_64_P045506  |           |                                                             | 1.20E-03 | 1.83 | 3.28E-05 | 1.20 | 1.26E-01 | -1.53 | 6.18E-04 |
| A_42_P808426  | Ifitm2    | interferon induced transmembrane protein 2                  | 9.53E-03 | 1.83 | 8.76E-04 | 1.38 | 4.33E-02 | -1.32 | 8.59E-02 |
| A_44_P354573  | Tax1bp3   | Tax1 (human T-cell leukemia virus type I) binding protein 3 | 1.96E-03 | 1.83 | 7.10E-05 | 1.23 | 9.70E-02 | -1.49 | 2.07E-03 |
| A_42_P810736  | Timeless  | timeless circadian clock                                    | 3.34E-03 | 1.83 | 1.69E-04 | 1.27 | 8.24E-02 | -1.45 | 6.98E-03 |
| A_43_P14036   | Ifi2712b  | interferon, alpha-inducible protein 27 like 2B              | 1.85E-02 | 1.83 | 2.44E-03 | 1.32 | 1.35E-01 | -1.38 | 7.83E-02 |
| A_44_P1038028 | Tnfrsf12a | tumor necrosis factor receptor superfamily, member 12a      | 1.28E-02 | 1.82 | 1.47E-03 | 1.27 | 1.78E-01 | -1.43 | 3.40E-02 |
| A_44_P424087  | Iqgap1    | IQ motif containing GTPase activating protein 1             | 1.07E-03 | 1.82 | 2.07E-05 | 1.25 | 4.11E-02 | -1.46 | 1.08E-03 |
| A_64_P077406  | Rnaset2   | ribonuclease T2                                             | 2.39E-02 | 1.82 | 4.48E-03 | 1.52 | 3.12E-02 | -1.19 | 4.65E-01 |

|               |          |                                                          |          |      |          |      |          |       |          |
|---------------|----------|----------------------------------------------------------|----------|------|----------|------|----------|-------|----------|
| A_64_P034344  | Cfh      | complement factor H                                      | 1.09E-02 | 1.82 | 1.09E-03 | 1.40 | 3.83E-02 | -1.30 | 1.21E-01 |
| A_44_P363647  | Ezh2     | enhancer of zeste homolog 2 (Drosophila)                 | 2.44E-03 | 1.82 | 9.45E-05 | 1.27 | 5.49E-02 | -1.43 | 5.32E-03 |
| A_42_P493824  | Dok1     | docking protein 1                                        | 6.17E-03 | 1.82 | 4.28E-04 | 1.35 | 3.91E-02 | -1.34 | 4.42E-02 |
| A_64_P148520  | Plk4     | polo-like kinase 4                                       | 8.32E-03 | 1.82 | 8.33E-04 | 1.22 | 2.41E-01 | -1.49 | 1.27E-02 |
| A_64_P013942  | Ifi2712b | interferon, alpha-inducible protein 27 like 2B           | 2.87E-02 | 1.82 | 4.73E-03 | 1.32 | 1.72E-01 | -1.37 | 1.15E-01 |
| A_64_P155629  | Csf2ra   | granulocyte-macrophage colony stimulating receptor alpha | 4.52E-03 | 1.82 | 2.64E-04 | 1.39 | 1.77E-02 | -1.30 | 5.59E-02 |
| A_64_P144891  |          |                                                          | 3.16E-03 | 1.81 | 1.39E-04 | 1.34 | 2.44E-02 | -1.35 | 1.94E-02 |
| A_43_P11812   | Bgn      | biglycan                                                 | 9.51E-03 | 1.81 | 8.71E-04 | 1.31 | 8.82E-02 | -1.38 | 4.19E-02 |
| A_64_P093448  |          |                                                          | 2.65E-02 | 1.81 | 4.17E-03 | 1.32 | 1.62E-01 | -1.37 | 1.09E-01 |
| A_43_P15253   | Icam1    | intercellular adhesion molecule 1                        | 9.59E-03 | 1.81 | 9.18E-04 | 1.42 | 2.87E-02 | -1.28 | 1.32E-01 |
| A_44_P579385  | Ahnak    | AHNAK nucleoprotein                                      | 3.05E-04 | 1.81 | 1.81E-06 | 1.16 | 9.35E-02 | -1.57 | 2.39E-05 |
| A_44_P1003372 | Smpdl3a  | sphingomyelin phosphodiesterase, acid-like 3A            | 1.14E-02 | 1.81 | 1.18E-03 | 1.39 | 4.40E-02 | -1.30 | 1.14E-01 |
| A_42_P744495  | Cd63     | Cd63 molecule                                            | 1.08E-02 | 1.81 | 1.11E-03 | 1.41 | 3.34E-02 | -1.28 | 1.38E-01 |
| A_64_P024419  | Parp14   | poly (ADP-ribose) polymerase family, member 14           | 8.32E-04 | 1.81 | 1.07E-05 | 1.29 | 1.30E-02 | -1.41 | 1.39E-03 |
| A_64_P067883  | Trim47   | tripartite motif-containing 47                           | 3.85E-02 | 1.81 | 7.38E-03 | 1.35 | 1.62E-01 | -1.33 | 1.85E-01 |
| A_43_P12437   | Hhex     | hematopoietically expressed homeobox                     | 7.16E-03 | 1.80 | 5.51E-04 | 1.36 | 3.83E-02 | -1.32 | 5.93E-02 |
| A_44_P433259  | Sipa1    | signal-induced proliferation-associated 1                | 1.45E-03 | 1.80 | 3.91E-05 | 1.24 | 5.52E-02 | -1.45 | 1.78E-03 |
| A_64_P318045  |          |                                                          | 8.24E-03 | 1.80 | 8.41E-04 | 1.21 | 2.63E-01 | -1.49 | 1.15E-02 |
| A_64_P026509  | Parva    | parvin, alpha                                            | 7.72E-04 | 1.80 | 1.10E-05 | 1.21 | 5.95E-02 | -1.49 | 3.39E-04 |

|               |         |                                                                           |          |      |          |      |          |       |          |
|---------------|---------|---------------------------------------------------------------------------|----------|------|----------|------|----------|-------|----------|
| A_44_P325508  | Anxa3   | annexin A3                                                                | 7.52E-03 | 1.80 | 6.20E-04 | 1.40 | 2.38E-02 | -1.28 | 1.06E-01 |
| A_64_P019295  | Shc1    | SHC (Src homology 2 domain containing) transforming protein 1             | 4.10E-03 | 1.80 | 2.21E-04 | 1.30 | 4.81E-02 | -1.38 | 1.68E-02 |
| A_44_P123887  | Smc4    | structural maintenance of chromosomes 4                                   | 1.82E-03 | 1.80 | 6.56E-05 | 1.21 | 1.16E-01 | -1.49 | 1.56E-03 |
| A_43_P17424   | Chaf1b  | chromatin assembly factor 1, subunit B (p60)                              | 1.04E-03 | 1.79 | 1.96E-05 | 1.23 | 4.60E-02 | -1.46 | 8.97E-04 |
| A_44_P137981  |         |                                                                           | 2.38E-02 | 1.79 | 3.73E-03 | 1.27 | 2.33E-01 | -1.41 | 6.51E-02 |
| A_44_P592381  | Edem1   | ER degradation enhancer, mannosidase alpha-like 1                         | 1.12E-02 | 1.79 | 1.13E-03 | 1.38 | 4.31E-02 | -1.30 | 1.12E-01 |
| A_64_P026316  | C4a     | complement component 4A (Rodgers blood group)                             | 1.62E-03 | 1.79 | 4.99E-05 | 1.23 | 6.75E-02 | -1.45 | 1.96E-03 |
| A_64_P057196  | Cldn14  | claudin 14                                                                | 3.54E-02 | 1.79 | 6.58E-03 | 1.37 | 1.24E-01 | -1.30 | 2.14E-01 |
| A_64_P021840  | Kpna2   | karyopherin alpha 2                                                       | 1.37E-02 | 1.79 | 1.55E-03 | 1.29 | 1.35E-01 | -1.39 | 4.92E-02 |
| A_44_P1004323 | Col18a1 | collagen, type XVIII, alpha 1                                             | 1.92E-02 | 1.79 | 2.65E-03 | 1.28 | 1.80E-01 | -1.39 | 6.18E-02 |
| A_64_P117180  | Rnaset2 | ribonuclease T2                                                           | 2.73E-02 | 1.79 | 5.13E-03 | 1.48 | 4.31E-02 | -1.21 | 4.11E-01 |
| A_64_P139138  |         |                                                                           | 2.92E-03 | 1.78 | 1.23E-04 | 1.31 | 3.01E-02 | -1.36 | 1.35E-02 |
| A_44_P501898  | Chtf18  | CTF18, chromosome transmission fidelity factor 18 homolog (S. cerevisiae) | 3.35E-04 | 1.78 | 2.40E-06 | 1.16 | 8.29E-02 | -1.54 | 3.75E-05 |
| A_64_P103823  | Ppp1r18 | protein phosphatase 1, regulatory subunit 18                              | 8.64E-03 | 1.78 | 7.46E-04 | 1.33 | 6.23E-02 | -1.34 | 5.07E-02 |
| A_43_P11514   | Tpm4    | tropomyosin 4                                                             | 4.74E-03 | 1.78 | 2.83E-04 | 1.32 | 4.00E-02 | -1.35 | 2.71E-02 |
| A_64_P092201  | Cp      | ceruloplasmin (ferroxidase)                                               | 2.69E-02 | 1.78 | 4.26E-03 | 1.35 | 1.22E-01 | -1.32 | 1.48E-01 |
| A_64_P155393  | Ccnd1   | cyclin D1                                                                 | 6.33E-03 | 1.78 | 4.49E-04 | 1.31 | 5.62E-02 | -1.36 | 3.23E-02 |
| A_44_P425580  | Cxcr4   | chemokine (C-X-C motif) receptor 4                                        | 2.96E-02 | 1.78 | 5.47E-03 | 1.44 | 5.90E-02 | -1.23 | 3.43E-01 |
| A_64_P056689  |         |                                                                           | 4.33E-04 | 1.78 | 3.75E-06 | 1.17 | 7.03E-02 | -1.51 | 7.55E-05 |

|              |            |                                                                                                                                           |          |      |          |      |          |       |          |
|--------------|------------|-------------------------------------------------------------------------------------------------------------------------------------------|----------|------|----------|------|----------|-------|----------|
| A_64_P114768 |            |                                                                                                                                           | 2.16E-02 | 1.78 | 3.08E-03 | 1.33 | 1.15E-01 | -1.33 | 1.16E-01 |
| A_44_P363494 | RGD1563847 | similar to karyopherin (importin) alpha 2                                                                                                 | 2.91E-02 | 1.77 | 4.82E-03 | 1.32 | 1.65E-01 | -1.35 | 1.23E-01 |
| A_64_P367740 |            |                                                                                                                                           | 1.87E-02 | 1.77 | 2.56E-03 | 1.27 | 1.94E-01 | -1.40 | 5.49E-02 |
| A_44_P484889 | Ifitm3     | interferon induced transmembrane protein 3                                                                                                | 6.03E-03 | 1.77 | 4.14E-04 | 1.33 | 3.89E-02 | -1.33 | 4.27E-02 |
| A_42_P698409 | Enpp3      | ectonucleotide pyrophosphatase/phosphodiesterase 3                                                                                        | 3.70E-02 | 1.77 | 7.03E-03 | 1.36 | 1.27E-01 | -1.30 | 2.22E-01 |
| A_44_P111816 | Adcy4      | adenylate cyclase 4                                                                                                                       | 1.46E-03 | 1.77 | 3.67E-05 | 1.27 | 2.57E-02 | -1.39 | 3.54E-03 |
| A_64_P144711 |            |                                                                                                                                           | 1.84E-03 | 1.77 | 6.26E-05 | 1.22 | 8.14E-02 | -1.44 | 2.14E-03 |
| A_64_P150321 |            |                                                                                                                                           | 1.22E-03 | 1.76 | 3.10E-05 | 1.20 | 9.12E-02 | -1.47 | 8.07E-04 |
| A_44_P139869 | Tmem176b   | transmembrane protein 176B                                                                                                                | 1.35E-02 | 1.76 | 1.57E-03 | 1.40 | 3.77E-02 | -1.26 | 1.73E-01 |
| A_44_P945669 | Dsn1       | DSN1, MIND kinetochore complex component, homolog (S. cerevisiae)                                                                         | 1.12E-03 | 1.76 | 2.13E-05 | 1.27 | 1.91E-02 | -1.39 | 2.36E-03 |
| A_44_P102197 | Alox5ap    | arachidonate 5-lipoxygenase activating protein                                                                                            | 1.83E-03 | 1.76 | 5.79E-05 | 1.25 | 5.07E-02 | -1.41 | 3.16E-03 |
| A_64_P136501 | Vwf        | von Willebrand factor                                                                                                                     | 4.77E-03 | 1.76 | 3.32E-04 | 1.22 | 1.58E-01 | -1.44 | 7.49E-03 |
| A_64_P163787 | LOC687827  | similar to Serine/threonine-protein kinase Haspin (Haploid germ cell-specific nuclear protein kinase) (Germ cell-specific gene 2 protein) | 4.39E-03 | 1.76 | 2.45E-04 | 1.32 | 3.29E-02 | -1.33 | 2.79E-02 |
| A_64_P091851 | LOC497848  | hypothetical LOC497848                                                                                                                    | 9.05E-04 | 1.76 | 1.38E-05 | 1.23 | 3.30E-02 | -1.43 | 7.89E-04 |
| A_64_P101346 | Ppic       | peptidylprolyl isomerase C                                                                                                                | 7.18E-04 | 1.76 | 8.19E-06 | 1.26 | 1.48E-02 | -1.40 | 8.57E-04 |
| A_42_P812008 | Nupr1      | nuclear protein, transcriptional regulator, 1                                                                                             | 7.90E-03 | 1.76 | 8.78E-04 | 1.17 | 3.73E-01 | -1.50 | 7.53E-03 |
| A_64_P030257 | Vrk2       | vaccinia related kinase 2                                                                                                                 | 8.43E-03 | 1.76 | 8.23E-04 | 1.22 | 2.11E-01 | -1.44 | 1.47E-02 |
| A_44_P974862 | Pld4       | phospholipase D family, member 4                                                                                                          | 4.76E-02 | 1.75 | 1.12E-02 | 1.43 | 8.87E-02 | -1.22 | 4.27E-01 |

|               |            |                                                                                                 |          |      |          |      |          |       |          |
|---------------|------------|-------------------------------------------------------------------------------------------------|----------|------|----------|------|----------|-------|----------|
| A_44_P475444  | RGD1564614 | similar to complement factor H-related protein                                                  | 2.15E-03 | 1.75 | 7.19E-05 | 1.30 | 2.32E-02 | -1.35 | 9.12E-03 |
| A_44_P332606  | C2         | complement component 2                                                                          | 1.75E-02 | 1.75 | 2.27E-03 | 1.37 | 6.13E-02 | -1.28 | 1.58E-01 |
| A_44_P532237  | Fanca      | Fanconi anemia, complementation group A                                                         | 4.79E-03 | 1.75 | 2.98E-04 | 1.27 | 7.46E-02 | -1.38 | 1.51E-02 |
| A_64_P151318  | LOC313641  | perlecan                                                                                        | 4.35E-04 | 1.75 | 3.96E-06 | 1.17 | 7.82E-02 | -1.50 | 7.34E-05 |
| A_64_P105228  | Myl12a     | myosin, light chain 12A, regulatory, non-sarcomeric                                             | 6.63E-04 | 1.75 | 6.62E-06 | 1.27 | 9.04E-03 | -1.38 | 1.03E-03 |
| A_44_P1007215 | Upp1       | uridine phosphorylase 1                                                                         | 2.02E-02 | 1.75 | 3.01E-03 | 1.23 | 2.64E-01 | -1.41 | 4.50E-02 |
| A_42_P569708  | Gpsm3      | G-protein signaling modulator 3                                                                 | 8.43E-03 | 1.74 | 7.21E-04 | 1.29 | 7.73E-02 | -1.35 | 3.92E-02 |
| A_42_P744440  | Parp3      | poly (ADP-ribose) polymerase family, member 3                                                   | 2.84E-03 | 1.74 | 1.35E-04 | 1.21 | 1.16E-01 | -1.44 | 3.70E-03 |
| A_44_P166581  | Ifitm7     | interferon induced transmembrane protein 7                                                      | 9.52E-03 | 1.74 | 8.79E-04 | 1.36 | 3.74E-02 | -1.28 | 9.90E-02 |
| A_44_P1006058 | Ctsk       | cathepsin K                                                                                     | 1.47E-02 | 1.74 | 1.80E-03 | 1.25 | 1.83E-01 | -1.39 | 4.07E-02 |
| A_64_P139873  | Rhbdf2     | rhomoid 5 homolog 2 (Drosophila)                                                                | 3.77E-03 | 1.74 | 1.92E-04 | 1.31 | 3.06E-02 | -1.33 | 2.26E-02 |
| A_64_P091852  | LOC497848  | hypothetical LOC497848                                                                          | 6.54E-03 | 1.74 | 5.28E-04 | 1.23 | 1.52E-01 | -1.41 | 1.32E-02 |
| A_43_P22409   | Mtbp       | Mdm2, transformed 3T3 cell double minute 2, p53 binding protein (mouse) binding protein, 104kDa | 4.96E-03 | 1.73 | 3.49E-04 | 1.22 | 1.49E-01 | -1.42 | 8.46E-03 |
| A_42_P755887  | Mlxipl     | MLX interacting protein-like                                                                    | 7.37E-04 | 1.73 | 9.20E-06 | 1.22 | 2.88E-02 | -1.42 | 5.34E-04 |
| A_44_P275029  | Mvp        | major vault protein                                                                             | 2.49E-02 | 1.73 | 3.88E-03 | 1.28 | 1.88E-01 | -1.36 | 8.63E-02 |
| A_44_P457548  | Parp9      | poly (ADP-ribose) polymerase family, member 9                                                   | 2.57E-03 | 1.73 | 9.81E-05 | 1.27 | 3.72E-02 | -1.36 | 8.29E-03 |
| A_64_P079751  | Bst1       | bone marrow stromal cell antigen 1                                                              | 1.25E-02 | 1.73 | 1.40E-03 | 1.38 | 3.52E-02 | -1.25 | 1.65E-01 |
| A_43_P11236   | Laptm5     | lysosomal protein transmembrane 5                                                               | 1.14E-02 | 1.73 | 1.25E-03 | 1.40 | 2.73E-02 | -1.24 | 1.85E-01 |
| A_64_P182546  | Iqgap3     | IQ motif containing GTPase activating protein 3                                                 | 8.54E-03 | 1.73 | 7.61E-04 | 1.37 | 2.67E-02 | -1.26 | 1.17E-01 |

|               |            |                                                               |          |      |          |      |          |       |          |
|---------------|------------|---------------------------------------------------------------|----------|------|----------|------|----------|-------|----------|
| A_64_P055102  | Eci3       | enoyl-Coenzyme A delta isomerase 3                            | 2.90E-03 | 1.72 | 1.87E-04 | 1.14 | 3.39E-01 | -1.51 | 1.52E-03 |
| A_64_P073004  | Gusb       | glucuronidase, beta                                           | 1.58E-02 | 1.72 | 2.00E-03 | 1.37 | 4.96E-02 | -1.26 | 1.69E-01 |
| A_44_P199469  | Gsdmd      | gasdermin D                                                   | 3.48E-03 | 1.72 | 1.80E-04 | 1.24 | 7.63E-02 | -1.39 | 8.15E-03 |
| A_64_P046125  | Tmem88     | transmembrane protein 88                                      | 1.54E-03 | 1.72 | 4.91E-05 | 1.20 | 9.53E-02 | -1.44 | 1.35E-03 |
| A_64_P001066  | RGD1561738 | similar to interferon induced transmembrane protein 2 (1-8D)  | 1.74E-02 | 1.72 | 2.38E-03 | 1.40 | 4.10E-02 | -1.23 | 2.33E-01 |
| A_64_P126756  | Fxyd2      | FXYD domain-containing ion transport regulator 2              | 7.54E-03 | 1.72 | 6.01E-04 | 1.33 | 3.92E-02 | -1.29 | 6.36E-02 |
| A_42_P640700  | Tmem176a   | transmembrane protein 176A                                    | 3.14E-02 | 1.72 | 6.41E-03 | 1.44 | 4.88E-02 | -1.19 | 4.41E-01 |
| A_44_P283561  | Mgst1      | microsomal glutathione S-transferase 1                        | 1.81E-02 | 1.71 | 2.37E-03 | 1.33 | 8.06E-02 | -1.29 | 1.27E-01 |
| A_64_P108804  | Sbno2      | strawberry notch homolog 2 (Drosophila)                       | 1.37E-02 | 1.71 | 1.53E-03 | 1.33 | 6.41E-02 | -1.29 | 1.04E-01 |
| A_42_P493380  | Myc        | myelocytomatosis oncogene                                     | 1.92E-02 | 1.71 | 2.56E-03 | 1.32 | 9.03E-02 | -1.29 | 1.23E-01 |
| A_64_P088382  | Angptl4    | angiopoietin-like 4                                           | 1.38E-03 | 1.71 | 3.62E-05 | 1.21 | 6.44E-02 | -1.42 | 1.39E-03 |
| A_44_P1042473 | Lgals3bp   | lectin, galactoside-binding, soluble, 3 binding protein       | 2.39E-02 | 1.71 | 3.89E-03 | 1.40 | 5.22E-02 | -1.22 | 2.89E-01 |
| A_44_P337300  | Il4ra      | interleukin 4 receptor, alpha                                 | 1.16E-02 | 1.71 | 1.33E-03 | 1.22 | 2.22E-01 | -1.40 | 2.35E-02 |
| A_42_P639027  | Mmp14      | matrix metalloproteinase 14 (membrane-inserted)               | 4.71E-02 | 1.71 | 1.05E-02 | 1.38 | 1.06E-01 | -1.23 | 3.58E-01 |
| A_42_P802550  | Pdlim1     | PDZ and LIM domain 1                                          | 1.30E-03 | 1.70 | 3.34E-05 | 1.20 | 6.74E-02 | -1.42 | 1.20E-03 |
| A_42_P805300  | Gpx1       | glutathione peroxidase 1                                      | 6.39E-03 | 1.70 | 4.60E-04 | 1.28 | 6.43E-02 | -1.33 | 2.89E-02 |
| A_43_P12961   | Eif4ebp1   | eukaryotic translation initiation factor 4E binding protein 1 | 3.07E-03 | 1.70 | 1.47E-04 | 1.23 | 8.26E-02 | -1.39 | 5.89E-03 |
| A_42_P522638  | Pqlc3      | PQ loop repeat containing 3                                   | 5.69E-03 | 1.70 | 3.78E-04 | 1.32 | 3.02E-02 | -1.29 | 4.97E-02 |
| A_44_P527154  | Hist1h2af  | histone cluster 1, H2af                                       | 6.57E-04 | 1.70 | 9.16E-06 | 1.16 | 9.85E-02 | -1.47 | 1.67E-04 |



|              |                |                                                                 |          |      |          |      |          |       |          |
|--------------|----------------|-----------------------------------------------------------------|----------|------|----------|------|----------|-------|----------|
| A_44_P389072 | Il13ra1        | interleukin 13 receptor, alpha 1                                | 4.53E-03 | 1.70 | 2.69E-04 | 1.26 | 6.46E-02 | -1.35 | 1.56E-02 |
| A_42_P817417 | PVR            | poliovirus receptor                                             | 8.03E-04 | 1.69 | 1.08E-05 | 1.22 | 2.85E-02 | -1.39 | 6.61E-04 |
| A_44_P777173 | Npl            | N-acetylneuraminase pyruvate lyase                              | 3.50E-02 | 1.69 | 7.74E-03 | 1.44 | 4.95E-02 | -1.17 | 4.95E-01 |
| A_44_P532548 | Fkbp10         | FK506 binding protein 10                                        | 1.39E-02 | 1.69 | 1.62E-03 | 1.25 | 1.58E-01 | -1.36 | 4.32E-02 |
| A_64_P014183 | Crip1          | cysteine-rich protein 1 (intestinal)                            | 1.36E-02 | 1.68 | 1.53E-03 | 1.27 | 1.21E-01 | -1.33 | 5.42E-02 |
| A_64_P022746 | Srpx           | sushi-repeat-containing protein, X-linked                       | 3.90E-02 | 1.68 | 1.07E-02 | 1.13 | 6.95E-01 | -1.50 | 3.72E-02 |
| A_64_P093124 | MGC108823      | similar to interferon-inducible GTPase                          | 2.38E-02 | 1.68 | 3.83E-03 | 1.38 | 5.44E-02 | -1.22 | 2.76E-01 |
| A_44_P116898 | RGD130875<br>1 | similar to Cathepsin L precursor (Major excreted protein) (MEP) | 1.43E-02 | 1.68 | 1.66E-03 | 1.34 | 4.87E-02 | -1.25 | 1.45E-01 |
| A_64_P128478 | RT1-DMa        | RT1 class II, locus DMa                                         | 2.09E-02 | 1.68 | 2.99E-03 | 1.34 | 7.29E-02 | -1.26 | 1.73E-01 |
| A_64_P073003 | Gusb           | glucuronidase, beta                                             | 1.26E-02 | 1.68 | 1.39E-03 | 1.35 | 4.09E-02 | -1.25 | 1.43E-01 |
| A_44_P107634 | Haus4          | HAUS augmin-like complex, subunit 4                             | 2.92E-03 | 1.68 | 1.40E-04 | 1.21 | 1.01E-01 | -1.39 | 4.49E-03 |
| A_44_P562251 | Ncapg2         | non-SMC condensin II complex, subunit G2                        | 1.46E-03 | 1.68 | 4.01E-05 | 1.21 | 5.64E-02 | -1.39 | 1.80E-03 |
| A_64_P091388 | Rai14          | retinoic acid induced 14                                        | 8.50E-03 | 1.68 | 7.41E-04 | 1.26 | 9.38E-02 | -1.33 | 3.29E-02 |
| A_64_P164227 |                |                                                                 | 3.46E-03 | 1.67 | 1.66E-04 | 1.29 | 2.56E-02 | -1.30 | 2.28E-02 |
| A_64_P099032 | Hist2h3c2      | histone cluster 2, H3c2                                         | 4.14E-03 | 1.67 | 2.51E-04 | 1.21 | 1.24E-01 | -1.39 | 7.07E-03 |
| A_44_P318466 | Trim25         | tripartite motif-containing 25                                  | 5.62E-03 | 1.67 | 3.94E-04 | 1.23 | 1.04E-01 | -1.36 | 1.46E-02 |
| A_44_P179745 | Fbn1           | fibrillin 1                                                     | 1.69E-02 | 1.67 | 2.21E-03 | 1.35 | 4.97E-02 | -1.24 | 1.85E-01 |
| A_64_P009355 | Reep4          | receptor accessory protein 4                                    | 1.15E-03 | 1.67 | 2.40E-05 | 1.22 | 3.51E-02 | -1.37 | 1.51E-03 |
| A_44_P296155 | RT1-A2         | RT1 class Ia, locus A2                                          | 2.21E-02 | 1.67 | 3.18E-03 | 1.29 | 1.16E-01 | -1.29 | 1.18E-01 |

|                   |         |                                                          |          |      |          |       |          |       |          |
|-------------------|---------|----------------------------------------------------------|----------|------|----------|-------|----------|-------|----------|
| A_42_P655047      | Prrx2   | paired related homeobox 2                                | 2.69E-03 | 1.67 | 1.25E-04 | 1.19  | 1.20E-01 | -1.40 | 3.25E-03 |
| A_44_P178811      | Elk3    | ELK3, ETS-domain protein                                 | 1.10E-03 | 1.67 | 3.39E-05 | 1.13  | 2.60E-01 | -1.48 | 2.93E-04 |
| A_64_P082393      | Ahnak   | AHNAK nucleoprotein                                      | 5.25E-03 | 1.67 | 3.35E-04 | 1.27  | 4.99E-02 | -1.31 | 2.62E-02 |
| A_43_P14228       | Cot11   | coactosin-like 1 (Dictyostelium)                         | 1.92E-02 | 1.67 | 2.64E-03 | 1.25  | 1.76E-01 | -1.34 | 6.30E-02 |
| A_42_P611638      | Sp110   | SP110 nuclear body protein                               | 1.49E-03 | 1.67 | 3.69E-05 | 1.27  | 1.45E-02 | -1.31 | 6.30E-03 |
| A_64_P033569      | Tep1    | telomerase associated protein 1                          | 2.02E-03 | 1.67 | 6.56E-05 | 1.25  | 3.15E-02 | -1.34 | 5.98E-03 |
| A_64_P082401      | Ahnak   | AHNAK nucleoprotein                                      | 8.88E-04 | 1.66 | 1.47E-05 | 1.18  | 6.29E-02 | -1.41 | 4.64E-04 |
| A_44_P101490<br>2 |         |                                                          | 4.46E-02 | 1.66 | 2.50E-02 | -1.00 | 1.00E+00 | -1.67 | 1.85E-02 |
| A_64_P293606      | Col4a1  | collagen, type IV, alpha 1                               | 3.68E-03 | 1.66 | 2.18E-04 | 1.19  | 1.42E-01 | -1.39 | 5.20E-03 |
| A_42_P704869      | Phf19   | PHD finger protein 19                                    | 1.08E-03 | 1.66 | 2.21E-05 | 1.19  | 5.63E-02 | -1.39 | 8.59E-04 |
| A_44_P996124      | Tlr4    | toll-like receptor 4                                     | 1.78E-02 | 1.66 | 2.30E-03 | 1.31  | 8.08E-02 | -1.27 | 1.23E-01 |
| A_64_P080002      | Cks1b   | CDC28 protein kinase regulatory subunit 1B               | 2.66E-02 | 1.66 | 4.32E-03 | 1.24  | 2.32E-01 | -1.34 | 7.57E-02 |
| A_64_P124473      | Ltbp2   | latent transforming growth factor beta binding protein 2 | 3.05E-02 | 1.66 | 5.25E-03 | 1.32  | 1.10E-01 | -1.26 | 1.97E-01 |
| A_44_P265058      | Gmn     | geminin                                                  | 4.52E-03 | 1.66 | 2.83E-04 | 1.22  | 1.05E-01 | -1.36 | 9.82E-03 |
| A_64_P007895      | Lrrn4cl | LRRN4 C-terminal like                                    | 9.75E-04 | 1.66 | 1.54E-05 | 1.23  | 1.92E-02 | -1.35 | 1.54E-03 |
| A_44_P140684      | Col8a1  | collagen, type VIII, alpha 1                             | 1.02E-02 | 1.65 | 9.67E-04 | 1.26  | 8.63E-02 | -1.31 | 4.79E-02 |
| A_42_P678430      | Card9   | caspase recruitment domain family, member 9              | 5.00E-03 | 1.65 | 3.09E-04 | 1.29  | 3.33E-02 | -1.28 | 3.60E-02 |
| A_44_P531647      | Plcg2   | phospholipase C, gamma 2                                 | 4.40E-02 | 1.65 | 9.11E-03 | 1.25  | 2.51E-01 | -1.32 | 1.41E-01 |
| A_44_P367926      |         |                                                          | 3.15E-02 | 1.65 | 5.50E-03 | 1.27  | 1.86E-01 | -1.31 | 1.23E-01 |

|               |           |                                                                      |          |      |          |      |          |       |          |
|---------------|-----------|----------------------------------------------------------------------|----------|------|----------|------|----------|-------|----------|
| A_43_P10944   | LOC686539 | similar to immunoglobulin superfamily containing leucine-rich repeat | 1.62E-04 | 1.65 | 5.17E-07 | 1.11 | 1.24E-01 | -1.49 | 4.14E-06 |
| A_64_P164764  | MGC105567 | similar to cDNA sequence BC023105                                    | 3.62E-02 | 1.65 | 6.74E-03 | 1.30 | 1.48E-01 | -1.27 | 1.86E-01 |
| A_64_P116274  | Fam65b    | family with sequence similarity 65, member B                         | 5.03E-03 | 1.65 | 3.15E-04 | 1.26 | 5.21E-02 | -1.31 | 2.33E-02 |
| A_44_P1028549 | Casp4     | caspase 4, apoptosis-related cysteine peptidase                      | 4.23E-03 | 1.65 | 2.32E-04 | 1.30 | 2.25E-02 | -1.27 | 3.83E-02 |
| A_42_P824489  | Tgm2      | transglutaminase 2, C polypeptide                                    | 3.29E-03 | 1.65 | 1.73E-04 | 1.19 | 1.19E-01 | -1.38 | 4.80E-03 |
| A_44_P548203  | Rbm3      | RNA binding motif (RNP1, RRM) protein 3                              | 2.33E-02 | 1.65 | 3.68E-03 | 1.21 | 2.64E-01 | -1.36 | 5.52E-02 |
| A_42_P688320  | Gbp5      | guanylate binding protein 5                                          | 1.23E-02 | 1.65 | 1.36E-03 | 1.35 | 3.44E-02 | -1.23 | 1.64E-01 |
| A_64_P002081  |           |                                                                      | 1.86E-02 | 1.65 | 2.90E-03 | 1.40 | 2.86E-02 | -1.18 | 3.62E-01 |
| A_64_P062288  | Spdl1     | spindle apparatus coiled-coil protein 1                              | 5.44E-03 | 1.65 | 3.53E-04 | 1.30 | 2.97E-02 | -1.27 | 4.66E-02 |
| A_64_P139202  | RT1-A1    | RT1 class Ia, locus A1                                               | 1.47E-02 | 1.65 | 1.70E-03 | 1.27 | 1.00E-01 | -1.29 | 7.38E-02 |
| A_64_P113695  | Myo7a     | myosin VIIA                                                          | 4.39E-03 | 1.64 | 2.46E-04 | 1.27 | 3.69E-02 | -1.29 | 2.51E-02 |
| A_64_P296046  | Rhoc      | ras homolog family member C                                          | 2.66E-02 | 1.64 | 4.34E-03 | 1.33 | 7.64E-02 | -1.23 | 2.31E-01 |
| A_43_P13241   | Ctsd      | cathepsin D                                                          | 2.32E-02 | 1.64 | 4.07E-03 | 1.40 | 3.51E-02 | -1.17 | 4.01E-01 |
| A_64_P058923  | Tes       | testis derived transcript                                            | 4.27E-03 | 1.64 | 2.46E-04 | 1.23 | 6.72E-02 | -1.33 | 1.34E-02 |
| A_64_P072883  |           |                                                                      | 3.75E-02 | 1.64 | 7.20E-03 | 1.25 | 2.33E-01 | -1.31 | 1.23E-01 |
| A_64_P129315  | Tgfbr2    | transforming growth factor, beta receptor II                         | 1.02E-03 | 1.64 | 1.66E-05 | 1.23 | 1.64E-02 | -1.33 | 1.98E-03 |
| A_64_P149501  | Col4a1    | collagen, type IV, alpha 1                                           | 7.13E-03 | 1.64 | 5.54E-04 | 1.25 | 7.91E-02 | -1.31 | 2.86E-02 |
| A_64_P073460  | Col6a2    | collagen, type VI, alpha 2                                           | 2.14E-02 | 1.64 | 3.90E-03 | 1.15 | 4.74E-01 | -1.42 | 2.61E-02 |
| A_64_P032208  | Tap1      | transporter 1, ATP-binding cassette, sub-family B (MDR/TAP)          | 4.12E-02 | 1.63 | 8.62E-03 | 1.34 | 9.96E-02 | -1.22 | 3.23E-01 |

|               |           |                                                             |          |      |          |      |          |       |          |
|---------------|-----------|-------------------------------------------------------------|----------|------|----------|------|----------|-------|----------|
| A_64_P081788  | Olfml3    | olfactomedin-like 3                                         | 6.55E-03 | 1.63 | 5.95E-04 | 1.17 | 2.55E-01 | -1.40 | 8.14E-03 |
| A_64_P028000  | Tax1bp3   | Tax1 (human T-cell leukemia virus type I) binding protein 3 | 6.38E-03 | 1.63 | 4.88E-04 | 1.21 | 1.20E-01 | -1.34 | 1.58E-02 |
| A_64_P060151  | Ccdc93    | coiled-coil domain containing 93                            | 1.01E-02 | 1.63 | 9.51E-04 | 1.28 | 6.26E-02 | -1.28 | 6.53E-02 |
| A_64_P030866  | Hist1h2af | histone cluster 1, H2af                                     | 4.77E-04 | 1.63 | 4.32E-06 | 1.16 | 4.81E-02 | -1.40 | 1.26E-04 |
| A_64_P100513  |           |                                                             | 1.20E-03 | 1.63 | 4.36E-05 | 1.11 | 3.35E-01 | -1.47 | 2.89E-04 |
| A_64_P128438  | Irf1      | interferon regulatory factor 1                              | 1.77E-03 | 1.63 | 5.22E-05 | 1.23 | 3.30E-02 | -1.33 | 4.30E-03 |
| A_64_P104282  | Sla       | src-like adaptor                                            | 2.07E-02 | 1.63 | 2.92E-03 | 1.24 | 1.68E-01 | -1.31 | 7.36E-02 |
| A_64_P019401  | Sdf2l1    | stromal cell-derived factor 2-like 1                        | 1.14E-02 | 1.63 | 1.35E-03 | 1.18 | 2.72E-01 | -1.38 | 1.84E-02 |
| A_44_P991864  | Ece1      | endothelin converting enzyme 1                              | 4.14E-03 | 1.63 | 3.88E-04 | 1.11 | 5.05E-01 | -1.47 | 1.93E-03 |
| A_44_P728469  | Pter      | phosphotriesterase related                                  | 6.64E-03 | 1.63 | 5.23E-04 | 1.21 | 1.19E-01 | -1.34 | 1.72E-02 |
| A_44_P328008  | Alx3      | aristaless-like homeobox 3                                  | 2.12E-02 | 1.63 | 3.01E-03 | 1.25 | 1.48E-01 | -1.30 | 8.70E-02 |
| A_44_P1040503 | Pctp      | phosphatidylcholine transfer protein                        | 4.79E-02 | 1.63 | 1.06E-02 | 1.33 | 1.27E-01 | -1.23 | 3.11E-01 |
| A_64_P117949  | Vsig2     | V-set and immunoglobulin domain containing 2                | 3.19E-03 | 1.63 | 2.08E-04 | 1.14 | 2.89E-01 | -1.43 | 2.09E-03 |
| A_64_P107866  | Myd88     | myeloid differentiation primary response 88                 | 1.30E-02 | 1.62 | 1.43E-03 | 1.30 | 5.24E-02 | -1.24 | 1.17E-01 |
| A_42_P819656  | Cfh       | complement factor H                                         | 1.61E-02 | 1.62 | 2.03E-03 | 1.32 | 5.27E-02 | -1.23 | 1.63E-01 |
| A_64_P011156  | Fcgr2a    | Fc fragment of IgG, low affinity IIa, receptor              | 2.07E-03 | 1.62 | 6.78E-05 | 1.24 | 2.70E-02 | -1.31 | 7.28E-03 |
| A_64_P160403  | Pdgfrl    | platelet-derived growth factor receptor-like                | 1.79E-02 | 1.62 | 3.25E-03 | 1.13 | 5.38E-01 | -1.44 | 1.75E-02 |
| A_44_P497553  | Gcnt1     | glucosaminyl (N-acetyl) transferase 1, core 2               | 3.82E-02 | 1.62 | 7.35E-03 | 1.30 | 1.36E-01 | -1.25 | 2.16E-01 |
| A_44_P317912  | Aldh1a2   | aldehyde dehydrogenase 1 family, member A2                  | 4.09E-03 | 1.62 | 3.07E-04 | 1.14 | 3.02E-01 | -1.42 | 3.10E-03 |

|              |           |                                                                                                        |          |      |          |      |          |       |          |
|--------------|-----------|--------------------------------------------------------------------------------------------------------|----------|------|----------|------|----------|-------|----------|
| A_43_P12079  | Ptges     | prostaglandin E synthase                                                                               | 3.38E-02 | 1.62 | 6.12E-03 | 1.29 | 1.31E-01 | -1.25 | 1.92E-01 |
| A_43_P17022  | Tmem173   | transmembrane protein 173                                                                              | 1.94E-02 | 1.62 | 2.96E-03 | 1.37 | 3.59E-02 | -1.18 | 3.10E-01 |
| A_42_P562617 | Irf5      | interferon regulatory factor 5                                                                         | 1.72E-02 | 1.62 | 2.18E-03 | 1.28 | 9.23E-02 | -1.27 | 1.03E-01 |
| A_44_P393580 | Esyt1     | extended synaptotagmin-like protein 1                                                                  | 1.94E-02 | 1.62 | 2.67E-03 | 1.23 | 1.77E-01 | -1.31 | 6.35E-02 |
| A_64_P165297 | Tnfrsf1b  | tumor necrosis factor receptor superfamily, member 1b                                                  | 3.58E-03 | 1.62 | 1.82E-04 | 1.32 | 1.08E-02 | -1.23 | 5.90E-02 |
| A_64_P033939 | Mcm4      | minichromosome maintenance complex component 4                                                         | 5.63E-03 | 1.62 | 4.51E-04 | 1.17 | 2.11E-01 | -1.38 | 7.53E-03 |
| A_44_P257582 | Csf1r     | colony stimulating factor 1 receptor                                                                   | 4.35E-02 | 1.62 | 9.32E-03 | 1.34 | 1.01E-01 | -1.21 | 3.39E-01 |
| A_64_P094816 |           |                                                                                                        | 2.12E-03 | 1.62 | 1.50E-04 | 1.08 | 5.84E-01 | -1.49 | 5.30E-04 |
| A_44_P126061 | Oasl2     | 2'-5' oligoadenylate synthetase-like 2                                                                 | 1.34E-02 | 1.61 | 1.47E-03 | 1.26 | 8.75E-02 | -1.28 | 7.32E-02 |
| A_42_P739929 |           |                                                                                                        | 1.13E-03 | 1.61 | 2.34E-05 | 1.20 | 3.67E-02 | -1.34 | 1.41E-03 |
| A_44_P144202 | Serpinf1  | serpin peptidase inhibitor, clade F (alpha-2 antiplasmin, pigment epithelium derived factor), member 1 | 3.52E-02 | 1.61 | 7.70E-03 | 1.16 | 4.76E-01 | -1.39 | 5.23E-02 |
| A_42_P780932 | Fcn1      | ficolin (collagen/fibrinogen domain containing) 1                                                      | 3.38E-02 | 1.61 | 6.07E-03 | 1.28 | 1.43E-01 | -1.26 | 1.75E-01 |
| A_42_P658552 | Ifngr1    | interferon gamma receptor 1                                                                            | 2.01E-02 | 1.61 | 2.76E-03 | 1.26 | 1.19E-01 | -1.28 | 1.01E-01 |
| A_43_P15701  | Rab13     | RAB13, member RAS oncogene family                                                                      | 2.50E-02 | 1.61 | 3.83E-03 | 1.27 | 1.24E-01 | -1.27 | 1.32E-01 |
| A_64_P163291 |           |                                                                                                        | 1.01E-02 | 1.61 | 1.45E-03 | 1.12 | 5.37E-01 | -1.44 | 7.43E-03 |
| A_44_P477620 | Pla2g4a   | phospholipase A2, group IVA (cytosolic, calcium-dependent)                                             | 2.95E-02 | 1.61 | 5.28E-03 | 1.20 | 2.99E-01 | -1.34 | 6.81E-02 |
| A_64_P100148 | LOC681383 | similar to Protein C10orf11 homolog                                                                    | 1.48E-02 | 1.61 | 1.76E-03 | 1.23 | 1.39E-01 | -1.30 | 5.41E-02 |
| A_44_P143472 | Ncapd2    | non-SMC condensin I complex, subunit D2                                                                | 6.17E-03 | 1.61 | 4.35E-04 | 1.24 | 6.37E-02 | -1.29 | 2.74E-02 |

|              |            |                                                       |          |      |          |      |          |       |          |
|--------------|------------|-------------------------------------------------------|----------|------|----------|------|----------|-------|----------|
| A_43_P15750  | Cfd        | complement factor D (adipsin)                         | 1.07E-02 | 1.61 | 1.13E-03 | 1.20 | 1.78E-01 | -1.34 | 2.56E-02 |
| A_44_P474559 | Eng        | endoglin                                              | 3.74E-02 | 1.61 | 7.07E-03 | 1.25 | 1.98E-01 | -1.28 | 1.45E-01 |
| A_64_P074998 | Itga4      | integrin, alpha 4                                     | 3.56E-03 | 1.61 | 1.75E-04 | 1.24 | 3.91E-02 | -1.29 | 1.59E-02 |
| A_64_P020586 | Crtap      | cartilage associated protein                          | 8.88E-04 | 1.60 | 1.59E-05 | 1.15 | 9.39E-02 | -1.39 | 3.44E-04 |
| A_43_P13069  | Chek1      | checkpoint kinase 1                                   | 6.54E-04 | 1.60 | 7.08E-06 | 1.19 | 2.41E-02 | -1.35 | 4.49E-04 |
| A_64_P036534 | Set        | SET nuclear oncogene                                  | 1.57E-02 | 1.60 | 1.90E-03 | 1.28 | 8.04E-02 | -1.26 | 1.03E-01 |
| A_44_P541053 | Fbln5      | fibulin 5                                             | 1.73E-03 | 1.60 | 7.47E-05 | 1.13 | 2.61E-01 | -1.43 | 7.31E-04 |
| A_64_P010373 | RGD1563378 | similar to ferritin heavy polypeptide-like 17         | 1.57E-02 | 1.60 | 1.98E-03 | 1.32 | 4.66E-02 | -1.22 | 1.78E-01 |
| A_64_P090548 | Rassf4     | Ras association (RalGDS/AF-6) domain family member 4  | 2.84E-02 | 1.60 | 4.99E-03 | 1.34 | 6.40E-02 | -1.20 | 3.00E-01 |
| A_64_P028803 | Il10rb     | interleukin 10 receptor, beta                         | 3.07E-03 | 1.60 | 1.33E-04 | 1.27 | 1.89E-02 | -1.26 | 2.37E-02 |
| A_44_P146518 | Col3a1     | collagen, type III, alpha 1                           | 1.44E-02 | 1.60 | 1.67E-03 | 1.24 | 1.19E-01 | -1.29 | 6.05E-02 |
| A_64_P072314 |            |                                                       | 3.29E-03 | 1.60 | 1.54E-04 | 1.22 | 5.26E-02 | -1.31 | 1.00E-02 |
| A_64_P163031 | Cklf       | chemokine-like factor                                 | 2.97E-02 | 1.60 | 5.52E-03 | 1.18 | 3.50E-01 | -1.35 | 5.81E-02 |
| A_64_P156730 | Nasp       | nuclear autoantigenic sperm protein (histone-binding) | 4.84E-03 | 1.59 | 3.58E-04 | 1.16 | 2.01E-01 | -1.37 | 6.13E-03 |
| A_64_P162262 | Cklf       | chemokine-like factor                                 | 1.36E-02 | 1.59 | 1.61E-03 | 1.20 | 1.94E-01 | -1.33 | 3.39E-02 |
| A_44_P477650 | Adap2      | ArfGAP with dual PH domains 2                         | 9.45E-03 | 1.59 | 8.76E-04 | 1.22 | 1.06E-01 | -1.30 | 3.45E-02 |
| A_43_P15303  | Erap1      | endoplasmic reticulum aminopeptidase 1                | 1.47E-03 | 1.59 | 4.64E-05 | 1.16 | 1.13E-01 | -1.37 | 1.06E-03 |
| A_42_P509843 | Tradd      | TNFRSF1A-associated via death domain                  | 7.09E-03 | 1.59 | 5.85E-04 | 1.20 | 1.37E-01 | -1.33 | 1.67E-02 |
| A_44_P172950 |            |                                                       | 4.84E-04 | 1.59 | 5.30E-06 | 1.13 | 1.13E-01 | -1.41 | 7.52E-05 |

|               |           |                                                                                  |          |      |          |      |          |       |          |
|---------------|-----------|----------------------------------------------------------------------------------|----------|------|----------|------|----------|-------|----------|
| A_64_P031046  | Draxin    | dorsal inhibitory axon guidance protein                                          | 1.18E-02 | 1.59 | 1.22E-03 | 1.25 | 8.15E-02 | -1.27 | 6.48E-02 |
| A_64_P089075  | Nme4      | non-metastatic cells 4, protein expressed in                                     | 3.47E-03 | 1.59 | 2.19E-04 | 1.15 | 2.17E-01 | -1.38 | 3.19E-03 |
| A_44_P904810  | Nckap1l   | NCK associated protein 1 like                                                    | 4.03E-02 | 1.58 | 1.01E-02 | 1.40 | 4.85E-02 | -1.13 | 5.89E-01 |
| A_42_P841704  | Sh3tc1    | SH3 domain and tetratricopeptide repeats 1                                       | 3.68E-03 | 1.58 | 1.85E-04 | 1.25 | 2.91E-02 | -1.26 | 2.28E-02 |
| A_42_P698240  | Ptgr1     | prostaglandin reductase 1                                                        | 7.98E-04 | 1.58 | 1.08E-05 | 1.18 | 3.26E-02 | -1.34 | 5.85E-04 |
| A_44_P1029397 | Bst2      | bone marrow stromal cell antigen 2                                               | 1.87E-02 | 1.58 | 2.50E-03 | 1.23 | 1.51E-01 | -1.29 | 7.09E-02 |
| A_64_P136597  |           |                                                                                  | 1.30E-03 | 1.58 | 2.72E-05 | 1.26 | 7.68E-03 | -1.26 | 8.01E-03 |
| A_64_P061537  |           |                                                                                  | 3.45E-02 | 1.58 | 6.95E-03 | 1.34 | 6.60E-02 | -1.18 | 3.77E-01 |
| A_64_P138543  | Bmp2k     | BMP-2 inducible kinase                                                           | 4.22E-03 | 1.58 | 2.99E-04 | 1.15 | 2.32E-01 | -1.37 | 4.20E-03 |
| A_42_P465664  | Eva1b     | eva-1 homolog B                                                                  | 6.55E-03 | 1.58 | 4.90E-04 | 1.22 | 8.58E-02 | -1.29 | 2.29E-02 |
| A_64_P047371  | Hist1h2ak | histone cluster 1, H2ak                                                          | 1.41E-03 | 1.58 | 4.40E-05 | 1.14 | 1.39E-01 | -1.38 | 7.97E-04 |
| A_64_P084223  | Gatsl3    | GATS protein-like 3                                                              | 2.57E-03 | 1.57 | 1.40E-04 | 1.13 | 2.62E-01 | -1.39 | 1.51E-03 |
| A_64_P147204  | Ahnak     | AHNAK nucleoprotein                                                              | 3.13E-04 | 1.57 | 2.01E-06 | 1.12 | 8.36E-02 | -1.40 | 2.99E-05 |
| A_64_P032611  | Ak2       | adenylate kinase 2                                                               | 9.39E-03 | 1.57 | 8.48E-04 | 1.25 | 6.66E-02 | -1.26 | 5.43E-02 |
| A_64_P043619  | Slc38a5   | solute carrier family 38, member 5                                               | 2.39E-02 | 1.57 | 4.65E-03 | 1.13 | 5.04E-01 | -1.39 | 2.84E-02 |
| A_42_P500280  | Naglu     | N-acetylglucosaminidase, alpha                                                   | 3.24E-03 | 1.57 | 1.51E-04 | 1.21 | 5.28E-02 | -1.30 | 9.77E-03 |
| A_42_P548763  | Slc39a1   | solute carrier family 39 (zinc transporter), member 1                            | 3.81E-03 | 1.57 | 2.02E-04 | 1.21 | 5.90E-02 | -1.29 | 1.23E-02 |
| A_64_P024655  | Aebp1     | AE binding protein 1                                                             | 2.08E-03 | 1.57 | 7.87E-05 | 1.17 | 8.64E-02 | -1.34 | 2.65E-03 |
| A_44_P787936  | Stat3     | signal transducer and activator of transcription 3 (acute-phase response factor) | 1.33E-02 | 1.57 | 1.48E-03 | 1.23 | 1.18E-01 | -1.28 | 5.42E-02 |

|              |            |                                                                   |          |      |          |      |          |       |          |
|--------------|------------|-------------------------------------------------------------------|----------|------|----------|------|----------|-------|----------|
| A_64_P026344 | Tln1       | talin 1                                                           | 3.04E-03 | 1.57 | 1.38E-04 | 1.20 | 5.78E-02 | -1.30 | 7.94E-03 |
| A_42_P727368 | Cdca7      | cell division cycle associated 7                                  | 1.14E-02 | 1.57 | 1.18E-03 | 1.22 | 1.16E-01 | -1.29 | 4.35E-02 |
| A_43_P23014  | Lpxn       | leupaxin                                                          | 1.45E-02 | 1.57 | 1.68E-03 | 1.28 | 6.14E-02 | -1.23 | 1.18E-01 |
| A_64_P010214 | Mms22l     | MMS22-like, DNA repair protein                                    | 4.35E-04 | 1.57 | 4.97E-06 | 1.10 | 1.93E-01 | -1.42 | 4.17E-05 |
| A_64_P044435 | Tgif1      | TGFB-induced factor homeobox 1                                    | 2.73E-02 | 1.57 | 4.48E-03 | 1.29 | 8.41E-02 | -1.21 | 2.19E-01 |
| A_64_P086314 |            |                                                                   | 1.43E-02 | 1.57 | 2.57E-03 | 1.10 | 6.18E-01 | -1.42 | 1.06E-02 |
| A_64_P065789 | Ccdc109b   | coiled-coil domain containing 109B                                | 3.19E-02 | 1.57 | 6.01E-03 | 1.32 | 7.06E-02 | -1.19 | 3.21E-01 |
| A_64_P057222 | RT1-S2     | RT1 class Ib, locus S2                                            | 4.11E-03 | 1.57 | 2.69E-04 | 1.16 | 1.84E-01 | -1.35 | 4.91E-03 |
| A_42_P473425 | Unc13d     | unc-13 homolog D (C. elegans)                                     | 1.31E-03 | 1.56 | 3.09E-05 | 1.19 | 3.66E-02 | -1.31 | 2.00E-03 |
| A_43_P12090  | Pold1      | polymerase (DNA directed), delta 1, catalytic subunit             | 2.72E-03 | 1.56 | 1.18E-04 | 1.19 | 7.45E-02 | -1.32 | 5.04E-03 |
| A_42_P629321 | Wisp2      | WNT1 inducible signaling pathway protein 2                        | 2.38E-02 | 1.56 | 8.91E-03 | 1.03 | 9.76E-01 | -1.53 | 9.79E-03 |
| A_64_P076900 | Nedd1      | neural precursor cell expressed, developmentally down-regulated 1 | 1.91E-02 | 1.56 | 2.93E-03 | 1.17 | 3.25E-01 | -1.34 | 3.34E-02 |
| A_64_P034749 | RGD1560859 | similar to 2300003P22Rik protein                                  | 2.01E-03 | 1.56 | 7.50E-05 | 1.17 | 9.72E-02 | -1.34 | 2.21E-03 |
| A_44_P200968 | Tlr6       | toll-like receptor 6                                              | 1.72E-02 | 1.56 | 2.32E-03 | 1.31 | 4.35E-02 | -1.19 | 2.17E-01 |
| A_44_P358194 | Fmo3       | flavin containing monooxygenase 3                                 | 8.68E-03 | 1.56 | 2.10E-03 | 1.03 | 9.50E-01 | -1.52 | 2.58E-03 |
| A_64_P133632 | RGD1306058 | similar to RIKEN cDNA 1110007C09                                  | 1.64E-02 | 1.56 | 2.04E-03 | 1.23 | 1.18E-01 | -1.27 | 7.49E-02 |
| A_44_P579594 | Dse        | dermatan sulfate epimerase                                        | 9.12E-04 | 1.56 | 1.26E-05 | 1.22 | 1.16E-02 | -1.28 | 1.92E-03 |
| A_64_P193845 | Ppp1r14b   | protein phosphatase 1, regulatory (inhibitor) subunit 14B         | 3.86E-03 | 1.56 | 2.12E-04 | 1.20 | 7.50E-02 | -1.30 | 1.01E-02 |
| A_64_P100904 | Mef2bnb    | MEF2B neighbor                                                    | 1.02E-03 | 1.56 | 2.47E-05 | 1.12 | 1.81E-01 | -1.39 | 3.01E-04 |



|               |            |                                                                                     |          |      |          |      |          |       |          |
|---------------|------------|-------------------------------------------------------------------------------------|----------|------|----------|------|----------|-------|----------|
| A_64_P091243  | LOC691221  | similar to CG1998-PA                                                                | 7.44E-03 | 1.56 | 7.64E-04 | 1.14 | 3.17E-01 | -1.37 | 8.10E-03 |
| A_44_P175584  | RGD1561520 | similar to Ab2-162                                                                  | 2.13E-02 | 1.56 | 3.09E-03 | 1.28 | 7.44E-02 | -1.22 | 1.75E-01 |
| A_44_P487910  | Lrrc33     | leucine rich repeat containing 33                                                   | 5.05E-03 | 1.56 | 3.16E-04 | 1.23 | 4.83E-02 | -1.27 | 2.54E-02 |
| A_64_P074715  | Layn       | layilin                                                                             | 3.05E-03 | 1.56 | 1.43E-04 | 1.19 | 7.31E-02 | -1.31 | 6.47E-03 |
| A_64_P046754  | Igfbp3     | insulin-like growth factor binding protein 3                                        | 1.92E-04 | 1.56 | 6.71E-07 | 1.12 | 6.17E-02 | -1.40 | 9.86E-06 |
| A_64_P000604  | Tradd      | TNFRSF1A-associated via death domain                                                | 4.81E-03 | 1.56 | 3.71E-04 | 1.15 | 2.37E-01 | -1.36 | 5.21E-03 |
| A_64_P009810  | Ybx1       | Y box binding protein 1                                                             | 9.40E-04 | 1.56 | 1.69E-05 | 1.16 | 5.83E-02 | -1.34 | 5.92E-04 |
| A_42_P616287  | C1r        | complement component 1, r subcomponent                                              | 5.81E-03 | 1.56 | 3.94E-04 | 1.23 | 5.82E-02 | -1.27 | 2.69E-02 |
| A_64_P107414  | Apbb1ip    | amyloid beta (A4) precursor protein-binding, family B, member 1 interacting protein | 1.26E-02 | 1.56 | 1.42E-03 | 1.30 | 3.68E-02 | -1.20 | 1.60E-01 |
| A_43_P16547   | Rras       | related RAS viral (r-ras) oncogene homolog                                          | 5.94E-04 | 1.55 | 5.98E-06 | 1.17 | 2.70E-02 | -1.33 | 3.24E-04 |
| A_44_P293169  | Mical1     | microtubule associated monooxygenase, calponin and LIM domain containing 1          | 1.05E-02 | 1.55 | 1.01E-03 | 1.24 | 7.48E-02 | -1.25 | 5.78E-02 |
| A_64_P142119  |            |                                                                                     | 1.99E-02 | 1.55 | 2.81E-03 | 1.29 | 6.10E-02 | -1.20 | 1.92E-01 |
| A_64_P147993  | Hist2h2ac  | histone cluster 2, H2ac                                                             | 1.16E-03 | 1.55 | 3.60E-05 | 1.11 | 2.36E-01 | -1.39 | 3.51E-04 |
| A_64_P114863  |            |                                                                                     | 1.45E-03 | 1.55 | 3.53E-05 | 1.21 | 2.20E-02 | -1.28 | 3.94E-03 |
| A_44_P1007008 | Ube2l6     | ubiquitin-conjugating enzyme E2L 6                                                  | 6.81E-03 | 1.55 | 5.12E-04 | 1.22 | 6.63E-02 | -1.27 | 3.15E-02 |
| A_64_P160862  |            |                                                                                     | 7.10E-03 | 1.55 | 5.41E-04 | 1.24 | 5.16E-02 | -1.25 | 4.32E-02 |
| A_42_P626433  | Scara5     | scavenger receptor class A, member 5 (putative)                                     | 2.36E-02 | 1.55 | 3.57E-03 | 1.28 | 8.05E-02 | -1.21 | 1.86E-01 |
| A_42_P773816  | Cd1d1      | CD1d1 molecule                                                                      | 2.37E-02 | 1.55 | 3.54E-03 | 1.26 | 1.03E-01 | -1.23 | 1.48E-01 |
| A_44_P471901  | Ptbp3      | polypyrimidine tract binding protein 3                                              | 3.29E-02 | 1.55 | 5.88E-03 | 1.23 | 1.92E-01 | -1.26 | 1.26E-01 |

|               |           |                                                      |          |      |          |      |          |       |          |
|---------------|-----------|------------------------------------------------------|----------|------|----------|------|----------|-------|----------|
| A_64_P090475  | RT1-CE5   | RT1 class I, locus CE5                               | 2.57E-03 | 1.55 | 1.15E-04 | 1.16 | 1.21E-01 | -1.33 | 2.92E-03 |
| A_44_P1025349 | Uba7      | ubiquitin-like modifier activating enzyme 7          | 4.50E-02 | 1.54 | 9.42E-03 | 1.21 | 2.64E-01 | -1.27 | 1.38E-01 |
| A_44_P838888  | Brip1     | BRCA1 interacting protein C-terminal helicase 1      | 7.32E-03 | 1.54 | 5.78E-04 | 1.22 | 7.14E-02 | -1.26 | 3.34E-02 |
| A_44_P1042783 | Tpm2      | tropomyosin 2, beta                                  | 3.53E-03 | 1.54 | 1.93E-04 | 1.17 | 1.07E-01 | -1.32 | 6.13E-03 |
| A_64_P136679  | Rab7b     | Rab7b, member RAS oncogene family                    | 4.65E-02 | 1.54 | 9.82E-03 | 1.25 | 1.72E-01 | -1.23 | 2.23E-01 |
| A_64_P090400  | Ska2      | spindle and kinetochore associated complex subunit 2 | 2.15E-02 | 1.54 | 3.26E-03 | 1.19 | 2.42E-01 | -1.30 | 5.43E-02 |
| A_64_P123931  | Polr3g    | polymerase (RNA) III (DNA directed) polypeptide G    | 2.34E-03 | 1.54 | 1.14E-04 | 1.13 | 2.04E-01 | -1.36 | 1.60E-03 |
| A_43_P14634   | Mcm4      | minichromosome maintenance complex component 4       | 2.70E-03 | 1.54 | 1.27E-04 | 1.16 | 1.25E-01 | -1.33 | 3.15E-03 |
| A_64_P006354  | Sfn       | stratifin                                            | 2.71E-02 | 1.54 | 4.35E-03 | 1.27 | 9.99E-02 | -1.22 | 1.82E-01 |
| A_44_P822447  | Ctla2a    | cytotoxic T lymphocyte-associated protein 2 alpha    | 3.43E-02 | 1.54 | 6.52E-03 | 1.19 | 2.91E-01 | -1.29 | 8.68E-02 |
| A_64_P105338  |           |                                                      | 6.48E-03 | 1.54 | 4.71E-04 | 1.22 | 6.13E-02 | -1.26 | 3.11E-02 |
| A_64_P086610  | Eef2k     | eukaryotic elongation factor-2 kinase                | 1.50E-03 | 1.54 | 6.74E-05 | 1.10 | 3.64E-01 | -1.40 | 4.29E-04 |
| A_44_P113974  | Ccr5      | chemokine (C-C motif) receptor 5                     | 1.58E-02 | 1.54 | 1.96E-03 | 1.28 | 5.32E-02 | -1.20 | 1.57E-01 |
| A_64_P012902  | Sdf2l1    | stromal cell-derived factor 2-like 1                 | 8.99E-03 | 1.54 | 9.64E-04 | 1.15 | 2.73E-01 | -1.34 | 1.27E-02 |
| A_64_P024464  |           |                                                      | 1.25E-03 | 1.54 | 2.55E-05 | 1.23 | 9.03E-03 | -1.25 | 6.26E-03 |
| A_64_P005043  | Nt5dc2    | 5'-nucleotidase domain containing 2                  | 3.34E-04 | 1.54 | 2.19E-06 | 1.12 | 6.90E-02 | -1.37 | 3.92E-05 |
| A_43_P22864   | Rad54l    | RAD54 like ( <i>S. cerevisiae</i> )                  | 2.08E-03 | 1.54 | 8.07E-05 | 1.16 | 1.02E-01 | -1.33 | 2.31E-03 |
| A_64_P072032  | LOC688591 | ferritin light chain-like                            | 2.11E-02 | 1.54 | 3.11E-03 | 1.29 | 5.84E-02 | -1.19 | 2.19E-01 |
| A_44_P1025613 | Pon3      | paraoxonase 3                                        | 8.65E-03 | 1.54 | 7.66E-04 | 1.21 | 9.72E-02 | -1.27 | 3.28E-02 |

|              |           |                                                                                     |          |      |          |      |          |       |          |
|--------------|-----------|-------------------------------------------------------------------------------------|----------|------|----------|------|----------|-------|----------|
| A_64_P096106 |           |                                                                                     | 8.03E-03 | 1.54 | 6.64E-04 | 1.24 | 5.42E-02 | -1.24 | 5.15E-02 |
| A_64_P102807 | RT1-T18   | RT1 class Ib, locus T18                                                             | 4.51E-02 | 1.54 | 9.32E-03 | 1.24 | 1.99E-01 | -1.24 | 1.85E-01 |
| A_42_P505241 | Qprt      | quinolinate phosphoribosyltransferase                                               | 3.63E-04 | 1.54 | 2.34E-06 | 1.14 | 3.73E-02 | -1.35 | 7.24E-05 |
| A_43_P11739  | Ctsl1     | cathepsin L1                                                                        | 2.33E-02 | 1.53 | 3.97E-03 | 1.33 | 3.97E-02 | -1.16 | 3.61E-01 |
| A_42_P720155 | LOC500700 | similar to chromosome 14 open reading frame 145                                     | 1.23E-02 | 1.53 | 1.32E-03 | 1.21 | 1.16E-01 | -1.27 | 4.88E-02 |
| A_64_P056512 | Apbb1ip   | amyloid beta (A4) precursor protein-binding, family B, member 1 interacting protein | 5.14E-03 | 1.53 | 3.25E-04 | 1.25 | 2.61E-02 | -1.22 | 4.85E-02 |
| A_44_P456792 | Lamc1     | laminin, gamma 1                                                                    | 1.88E-02 | 1.53 | 2.50E-03 | 1.26 | 8.00E-02 | -1.22 | 1.35E-01 |
| A_64_P092611 |           |                                                                                     | 1.08E-03 | 1.53 | 2.08E-05 | 1.18 | 3.03E-02 | -1.30 | 1.45E-03 |
| A_44_P153774 | Plce1     | phospholipase C, epsilon 1                                                          | 3.06E-02 | 1.53 | 5.87E-03 | 1.16 | 3.74E-01 | -1.32 | 5.64E-02 |
| A_64_P139516 |           |                                                                                     | 1.61E-03 | 1.53 | 4.41E-05 | 1.20 | 2.88E-02 | -1.28 | 3.98E-03 |
| A_44_P164132 | Tmem220   | transmembrane protein 220                                                           | 4.49E-02 | 1.53 | 9.24E-03 | 1.24 | 1.91E-01 | -1.24 | 1.91E-01 |
| A_64_P038168 |           |                                                                                     | 1.75E-02 | 1.53 | 2.34E-03 | 1.29 | 4.86E-02 | -1.19 | 1.99E-01 |
| A_64_P092170 | Igtp      | interferon gamma induced GTPase                                                     | 2.70E-02 | 1.53 | 4.33E-03 | 1.25 | 1.06E-01 | -1.22 | 1.73E-01 |
| A_64_P022235 | Anp32b    | acidic (leucine-rich) nuclear phosphoprotein 32 family, member B                    | 2.41E-03 | 1.53 | 1.44E-04 | 1.10 | 3.66E-01 | -1.39 | 1.01E-03 |
| A_64_P045544 |           |                                                                                     | 4.66E-03 | 1.53 | 2.87E-04 | 1.19 | 7.96E-02 | -1.28 | 1.35E-02 |
| A_43_P12234  | Ptbp1     | polypyrimidine tract binding protein 1                                              | 1.33E-03 | 1.53 | 3.27E-05 | 1.17 | 4.76E-02 | -1.30 | 1.66E-03 |
| A_64_P130547 |           |                                                                                     | 3.10E-02 | 1.53 | 5.46E-03 | 1.27 | 9.74E-02 | -1.20 | 2.28E-01 |
| A_44_P394228 | Amdhd2    | amidohydrolase domain containing 2                                                  | 1.96E-02 | 1.53 | 2.67E-03 | 1.21 | 1.55E-01 | -1.26 | 7.36E-02 |
| A_64_P010887 | Sat1      | spermidine/spermine N1-acetyl transferase 1                                         | 3.60E-02 | 1.53 | 8.41E-03 | 1.35 | 4.52E-02 | -1.13 | 5.50E-01 |

|               |              |                                                                                            |          |      |          |      |          |       |          |
|---------------|--------------|--------------------------------------------------------------------------------------------|----------|------|----------|------|----------|-------|----------|
| A_44_P127337  | Rbpms        | RNA binding protein with multiple splicing                                                 | 6.54E-04 | 1.53 | 7.06E-06 | 1.17 | 2.38E-02 | -1.31 | 4.53E-04 |
| A_44_P332422  | C1s          | complement component 1, s subcomponent                                                     | 9.33E-03 | 1.53 | 8.57E-04 | 1.20 | 1.02E-01 | -1.27 | 3.53E-02 |
| A_64_P110003  |              |                                                                                            | 8.53E-03 | 1.52 | 7.29E-04 | 1.23 | 5.59E-02 | -1.23 | 5.52E-02 |
| A_42_P518033  | Hsd17b1      | hydroxysteroid (17-beta) dehydrogenase 1                                                   | 2.03E-02 | 1.52 | 2.98E-03 | 1.18 | 2.37E-01 | -1.29 | 5.06E-02 |
| A_43_P18268   |              |                                                                                            | 3.05E-04 | 1.52 | 1.30E-06 | 1.15 | 1.52E-02 | -1.32 | 7.19E-05 |
| A_44_P1017481 | Timp2        | TIMP metalloproteinase inhibitor 2                                                         | 7.23E-03 | 1.52 | 5.76E-04 | 1.20 | 9.24E-02 | -1.27 | 2.53E-02 |
| A_44_P452176  | Chi3l1       | chitinase 3-like 1 (cartilage glycoprotein-39)                                             | 3.11E-02 | 1.52 | 5.47E-03 | 1.26 | 1.04E-01 | -1.20 | 2.16E-01 |
| A_64_P139463  | Slc10a7      | solute carrier family 10 (sodium/bile acid cotransporter family), member 7                 | 2.58E-02 | 1.52 | 4.02E-03 | 1.25 | 1.08E-01 | -1.22 | 1.58E-01 |
| A_64_P019653  |              |                                                                                            | 1.21E-02 | 1.52 | 1.55E-03 | 1.14 | 3.29E-01 | -1.33 | 1.66E-02 |
| A_42_P671206  | LOC100910973 | uncharacterized LOC100910973                                                               | 3.51E-03 | 1.52 | 1.70E-04 | 1.24 | 2.26E-02 | -1.23 | 2.66E-02 |
| A_64_P009809  | Ybx1         | Y box binding protein 1                                                                    | 6.33E-03 | 1.52 | 4.47E-04 | 1.22 | 5.30E-02 | -1.24 | 3.41E-02 |
| A_44_P192543  | Fkbp11       | FK506 binding protein 11                                                                   | 1.13E-02 | 1.52 | 1.19E-03 | 1.19 | 1.45E-01 | -1.28 | 3.43E-02 |
| A_44_P240819  | Stt3b        | STT3, subunit of the oligosaccharyltransferase complex, homolog B ( <i>S. cerevisiae</i> ) | 1.56E-02 | 1.52 | 1.90E-03 | 1.21 | 1.31E-01 | -1.26 | 6.23E-02 |
| A_64_P061855  | Recq4        | RecQ protein-like 4                                                                        | 6.31E-03 | 1.52 | 4.46E-04 | 1.22 | 5.70E-02 | -1.25 | 3.15E-02 |
| A_64_P141847  | Bcl2l12      | BCL2-like 12 (proline rich)                                                                | 3.85E-02 | 1.52 | 8.41E-03 | 1.32 | 6.50E-02 | -1.15 | 4.36E-01 |
| A_44_P899293  | Snai1        | snail homolog 1 ( <i>Drosophila</i> )                                                      | 1.82E-02 | 1.52 | 2.37E-03 | 1.24 | 9.30E-02 | -1.23 | 1.11E-01 |
| A_64_P059895  | Bgn          | biglycan                                                                                   | 1.20E-02 | 1.51 | 1.25E-03 | 1.25 | 5.77E-02 | -1.22 | 9.39E-02 |
| A_64_P001542  | Rps27l       | ribosomal protein S27-like                                                                 | 1.94E-02 | 1.51 | 2.66E-03 | 1.26 | 6.67E-02 | -1.20 | 1.69E-01 |
| A_44_P1006261 | Nme4         | non-metastatic cells 4, protein expressed in                                               | 9.53E-03 | 1.51 | 9.66E-04 | 1.17 | 1.93E-01 | -1.30 | 1.95E-02 |

|               |           |                                                                                |          |      |          |      |          |       |          |
|---------------|-----------|--------------------------------------------------------------------------------|----------|------|----------|------|----------|-------|----------|
| A_64_P133657  | Timd2     | T-cell immunoglobulin and mucin domain containing 2                            | 5.77E-03 | 1.51 | 3.85E-04 | 1.23 | 4.03E-02 | -1.23 | 3.81E-02 |
| A_42_P658264  | Nfkb2     | nuclear factor of kappa light polypeptide gene enhancer in B-cells 2, p49/p100 | 7.61E-03 | 1.51 | 6.07E-04 | 1.23 | 4.93E-02 | -1.23 | 5.14E-02 |
| A_42_P628839  | Ano6      | anoctamin 6                                                                    | 8.61E-03 | 1.51 | 7.60E-04 | 1.20 | 9.85E-02 | -1.26 | 3.21E-02 |
| A_43_P12586   | Ptgis     | prostaglandin I2 (prostacyclin) synthase                                       | 1.51E-02 | 1.51 | 2.85E-03 | 1.09 | 6.41E-01 | -1.39 | 1.10E-02 |
| A_42_P757414  | Diaph3    | diaphanous homolog 3 (Drosophila)                                              | 2.86E-02 | 1.51 | 4.71E-03 | 1.21 | 1.72E-01 | -1.24 | 1.15E-01 |
| A_64_P114908  |           |                                                                                | 1.62E-03 | 1.51 | 4.75E-05 | 1.29 | 2.49E-03 | -1.17 | 5.04E-02 |
| A_44_P106456  | Pdlim2    | PDZ and LIM domain 2                                                           | 2.77E-04 | 1.51 | 1.06E-06 | 1.14 | 2.28E-02 | -1.33 | 3.89E-05 |
| A_44_P463822  | Homer3    | homer homolog 3 (Drosophila)                                                   | 1.01E-02 | 1.51 | 9.41E-04 | 1.23 | 6.48E-02 | -1.23 | 6.24E-02 |
| A_44_P1049252 | Naprt1    | nicotinate phosphoribosyltransferase domain containing 1                       | 1.77E-03 | 1.51 | 6.43E-05 | 1.14 | 1.30E-01 | -1.32 | 1.35E-03 |
| A_64_P069033  | LOC298795 | similar to 14-3-3 protein sigma                                                | 4.58E-02 | 1.50 | 9.59E-03 | 1.22 | 2.19E-01 | -1.24 | 1.72E-01 |
| A_64_P006794  | Plod2     | procollagen lysine, 2-oxoglutarate 5-dioxygenase 2                             | 4.46E-02 | 1.50 | 9.47E-03 | 1.27 | 1.20E-01 | -1.19 | 2.99E-01 |
| A_44_P212850  | Fgf2      | fibroblast growth factor 2                                                     | 4.12E-02 | 1.50 | 8.66E-03 | 1.17 | 3.36E-01 | -1.28 | 9.53E-02 |
| A_43_P15587   | Map3k8    | mitogen-activated protein kinase kinase kinase 8                               | 4.12E-02 | 1.50 | 8.65E-03 | 1.28 | 9.88E-02 | -1.18 | 3.26E-01 |
| A_64_P014278  | Golm1     | golgi membrane protein 1                                                       | 2.96E-02 | 1.50 | 5.53E-03 | 1.30 | 5.59E-02 | -1.16 | 3.60E-01 |
| A_42_P468723  | Cln5      | ceroid-lipofuscinosis, neuronal 5                                              | 1.78E-02 | 1.50 | 2.30E-03 | 1.22 | 1.12E-01 | -1.23 | 8.97E-02 |
| A_64_P057225  | RT1-S2    | RT1 class Ib, locus S2                                                         | 3.74E-02 | 1.50 | 7.06E-03 | 1.21 | 2.01E-01 | -1.24 | 1.42E-01 |
| A_64_P067778  |           |                                                                                | 3.35E-04 | 1.50 | 2.67E-06 | 1.10 | 1.33E-01 | -1.37 | 2.82E-05 |
| A_43_P10923   | Scamp2    | secretory carrier membrane protein 2                                           | 1.03E-02 | 1.50 | 1.02E-03 | 1.26 | 3.53E-02 | -1.19 | 1.21E-01 |
| A_44_P180717  | Pstpip1   | proline-serine-threonine phosphatase-interacting protein 1                     | 9.52E-03 | 1.50 | 1.03E-03 | 1.14 | 2.62E-01 | -1.31 | 1.44E-02 |

|              |            |                                                                           |          |       |          |       |          |       |          |
|--------------|------------|---------------------------------------------------------------------------|----------|-------|----------|-------|----------|-------|----------|
| A_64_P027941 |            |                                                                           | 1.44E-02 | 1.50  | 1.79E-03 | 1.16  | 2.28E-01 | -1.29 | 3.13E-02 |
| A_64_P029242 | Pak6       | p21 protein (Cdc42/Rac)-activated kinase 6                                | 1.83E-02 | -1.50 | 2.99E-03 | -1.13 | 4.13E-01 | 1.33  | 2.44E-02 |
| A_42_P783572 | Atp1a1     | ATPase, Na <sup>+</sup> /K <sup>+</sup> transporting, alpha 1 polypeptide | 1.24E-03 | -1.50 | 2.79E-05 | -1.17 | 3.77E-02 | 1.28  | 1.71E-03 |
| A_64_P097907 | Camk1g     | calcium/calmodulin-dependent protein kinase IG                            | 7.92E-03 | -1.50 | 6.52E-04 | -1.21 | 7.77E-02 | 1.25  | 3.49E-02 |
| A_64_P039656 | Th         | tyrosine hydroxylase                                                      | 1.56E-02 | -1.50 | 2.73E-03 | -1.10 | 5.55E-01 | 1.36  | 1.38E-02 |
| A_44_P776423 | Opalin     | oligodendrocytic myelin paranodal and inner loop protein                  | 8.99E-03 | -1.50 | 1.02E-03 | -1.13 | 3.30E-01 | 1.33  | 1.05E-02 |
| A_44_P448181 | Clstn1     | calsyntenin 1                                                             | 3.25E-02 | -1.51 | 6.74E-03 | -1.14 | 4.44E-01 | 1.32  | 5.07E-02 |
| A_44_P527024 | Col11a2    | collagen, type XI, alpha 2                                                | 4.56E-02 | -1.51 | 9.54E-03 | -1.22 | 2.24E-01 | 1.24  | 1.67E-01 |
| A_64_P142640 | Gjc3       | gap junction protein, gamma 3                                             | 1.21E-03 | -1.51 | 4.58E-05 | -1.09 | 3.67E-01 | 1.39  | 2.72E-04 |
| A_64_P112909 |            |                                                                           | 3.38E-02 | -1.51 | 6.24E-03 | -1.19 | 2.48E-01 | 1.27  | 1.00E-01 |
| A_44_P468380 | Kcni2      | Kv channel-interacting protein 2                                          | 3.21E-02 | -1.51 | 5.83E-03 | -1.27 | 8.96E-02 | 1.19  | 2.58E-01 |
| A_43_P14919  | Pdp1       | pyruvate dehydrogenase phosphatase catalytic subunit 1                    | 4.85E-03 | -1.51 | 4.99E-04 | -1.09 | 5.04E-01 | 1.39  | 2.55E-03 |
| A_44_P440686 | Map3k10    | mitogen activated protein kinase kinase kinase 10                         | 1.92E-04 | -1.51 | 5.49E-07 | -1.11 | 4.59E-02 | 1.36  | 9.68E-06 |
| A_64_P110284 | Tbc1d10c   | TBC1 domain family, member 10C                                            | 1.99E-02 | -1.51 | 2.72E-03 | -1.23 | 1.04E-01 | 1.23  | 1.13E-01 |
| A_64_P017363 | Slc30a3    | solute carrier family 30 (zinc transporter), member 3                     | 1.07E-02 | -1.51 | 1.30E-03 | -1.14 | 3.26E-01 | 1.33  | 1.40E-02 |
| A_64_P085896 | Grin1      | glutamate receptor, ionotropic, N-methyl D-aspartate 1                    | 1.79E-03 | -1.51 | 6.06E-05 | -1.16 | 8.54E-02 | 1.31  | 1.96E-03 |
| A_64_P019200 | RGD1560608 | similar to novel protein                                                  | 8.50E-03 | -1.51 | 7.28E-04 | -1.22 | 6.70E-02 | 1.24  | 4.58E-02 |
| A_64_P126685 | Gucy1b3    | guanylate cyclase 1, soluble, beta 3                                      | 5.50E-03 | -1.52 | 4.91E-04 | -1.12 | 3.16E-01 | 1.35  | 4.95E-03 |
| A_43_P15426  | Trpc3      | transient receptor potential cation channel, subfamily C, member 3        | 4.94E-03 | -1.52 | 4.34E-04 | -1.12 | 3.45E-01 | 1.36  | 3.84E-03 |

|              |        |                                                              |          |       |          |       |          |      |          |
|--------------|--------|--------------------------------------------------------------|----------|-------|----------|-------|----------|------|----------|
| A_44_P156589 | Ngef   | neuronal guanine nucleotide exchange factor                  | 2.12E-02 | -1.52 | 3.18E-03 | -1.18 | 2.36E-01 | 1.28 | 5.45E-02 |
| A_44_P135006 | Trim9  | tripartite motif-containing 9                                | 1.02E-02 | -1.52 | 1.17E-03 | -1.15 | 2.84E-01 | 1.32 | 1.50E-02 |
| A_43_P12967  | Cap2   | CAP, adenylate cyclase-associated protein, 2 (yeast)         | 5.38E-03 | -1.52 | 5.06E-04 | -1.11 | 3.77E-01 | 1.36 | 4.01E-03 |
| A_43_P10560  | Ncald  | neurocalcin delta                                            | 1.22E-03 | -1.52 | 3.47E-05 | -1.12 | 1.51E-01 | 1.35 | 5.48E-04 |
| A_43_P11774  | Grin1  | glutamate receptor, ionotropic, N-methyl D-aspartate 1       | 5.77E-03 | -1.52 | 5.18E-04 | -1.13 | 3.05E-01 | 1.35 | 5.52E-03 |
| A_64_P165964 | Hpca   | hippocalcin                                                  | 5.53E-03 | -1.52 | 4.15E-04 | -1.16 | 1.62E-01 | 1.31 | 9.35E-03 |
| A_64_P002814 | Grhl3  | grainyhead-like 3 (Drosophila)                               | 4.50E-02 | -1.52 | 1.98E-02 | -1.03 | 9.70E-01 | 1.48 | 2.37E-02 |
| A_44_P790674 | Opn3   | opsin 3                                                      | 9.34E-05 | -1.52 | 1.63E-07 | -1.07 | 2.12E-01 | 1.42 | 7.04E-07 |
| A_43_P15933  | Chrm4  | cholinergic receptor, muscarinic 4                           | 3.29E-03 | -1.52 | 1.69E-04 | -1.16 | 1.08E-01 | 1.31 | 5.22E-03 |
| A_64_P058280 |        |                                                              | 1.08E-02 | -1.52 | 2.28E-03 | -1.05 | 8.37E-01 | 1.44 | 4.59E-03 |
| A_64_P031467 | Cdk5r2 | cyclin-dependent kinase 5, regulatory subunit 2 (p39)        | 1.12E-02 | -1.52 | 1.13E-03 | -1.21 | 1.06E-01 | 1.26 | 4.55E-02 |
| A_44_P185110 | Ube2q1 | ubiquitin-conjugating enzyme E2Q family-like 1               | 1.82E-03 | -1.52 | 9.97E-05 | -1.09 | 4.43E-01 | 1.40 | 5.14E-04 |
| A_43_P15511  | Slc5a7 | solute carrier family 5 (choline transporter), member 7      | 2.40E-02 | -1.53 | 3.67E-03 | -1.21 | 1.86E-01 | 1.27 | 8.28E-02 |
| A_42_P687133 | Nrgn   | neurogranin                                                  | 2.27E-03 | -1.53 | 8.57E-05 | -1.18 | 6.23E-02 | 1.30 | 4.14E-03 |
| A_44_P517858 | Svop   | SV2 related protein                                          | 3.24E-03 | -1.53 | 1.66E-04 | -1.17 | 1.07E-01 | 1.31 | 5.12E-03 |
| A_64_P117770 | Rgs7   | regulator of G-protein signaling 7                           | 6.44E-03 | -1.53 | 5.57E-04 | -1.15 | 2.22E-01 | 1.33 | 9.00E-03 |
| A_44_P885889 | Fam81a | family with sequence similarity 81, member A                 | 5.06E-04 | -1.53 | 4.65E-06 | -1.15 | 3.73E-02 | 1.33 | 1.74E-04 |
| A_44_P930152 | Mpped1 | metallophosphoesterase domain containing 1                   | 2.09E-02 | -1.53 | 3.24E-03 | -1.17 | 2.95E-01 | 1.31 | 4.22E-02 |
| A_44_P252491 | Kcnj4  | potassium inwardly-rectifying channel, subfamily J, member 4 | 1.34E-02 | -1.53 | 1.55E-03 | -1.19 | 1.74E-01 | 1.29 | 3.70E-02 |

|              |           |                                                                                         |          |       |          |       |          |      |          |
|--------------|-----------|-----------------------------------------------------------------------------------------|----------|-------|----------|-------|----------|------|----------|
| A_44_P430547 | Ntrk1     | neurotrophic tyrosine kinase, receptor, type 1                                          | 1.53E-02 | -1.53 | 1.83E-03 | -1.22 | 1.18E-01 | 1.26 | 6.75E-02 |
| A_64_P024981 | Chn1      | chimerin (chimaerin) 1                                                                  | 6.55E-03 | -1.53 | 7.83E-04 | -1.10 | 5.23E-01 | 1.40 | 3.95E-03 |
| A_64_P041219 | Pcsk1     | proprotein convertase subtilisin/kexin type 1                                           | 2.76E-03 | -1.54 | 1.57E-04 | -1.12 | 2.52E-01 | 1.37 | 1.81E-03 |
| A_44_P507911 | Nexn      | nexilin (F actin binding protein)                                                       | 4.36E-02 | -1.54 | 9.41E-03 | -1.18 | 3.50E-01 | 1.30 | 9.83E-02 |
| A_44_P414565 | Gabra5    | gamma-aminobutyric acid (GABA) A receptor, alpha 5                                      | 9.37E-04 | -1.54 | 1.83E-05 | -1.14 | 9.76E-02 | 1.35 | 3.95E-04 |
| A_64_P074440 | Rbm24     | RNA binding motif protein 24                                                            | 1.43E-02 | -1.54 | 1.94E-03 | -1.15 | 3.18E-01 | 1.34 | 2.22E-02 |
| A_64_P144253 | Shank2    | SH3 and multiple ankyrin repeat domains 2                                               | 1.32E-02 | -1.54 | 1.51E-03 | -1.19 | 1.67E-01 | 1.29 | 3.77E-02 |
| A_64_P092995 | Nanos1    | nanos homolog 1 (Drosophila)                                                            | 3.05E-04 | -1.54 | 1.42E-06 | -1.13 | 4.14E-02 | 1.36 | 3.49E-05 |
| A_64_P019966 | Snap25    | synaptosomal-associated protein 25                                                      | 3.89E-04 | -1.54 | 3.50E-06 | -1.11 | 1.35E-01 | 1.39 | 3.85E-05 |
| A_43_P11980  | Rasgrp1   | RAS guanyl releasing protein 1 (calcium and DAG-regulated)                              | 4.51E-04 | -1.54 | 4.88E-06 | -1.11 | 1.50E-01 | 1.39 | 5.20E-05 |
| A_44_P550490 | Grem1     | gremlin 1                                                                               | 2.20E-02 | -1.54 | 3.18E-03 | -1.23 | 1.47E-01 | 1.26 | 9.24E-02 |
| A_64_P047168 | Arpp21    | cAMP-regulated phosphoprotein 21                                                        | 3.34E-03 | -1.55 | 1.98E-04 | -1.15 | 1.90E-01 | 1.35 | 3.31E-03 |
| A_64_P131036 | Dos       | downstream of Stk11                                                                     | 7.05E-04 | -1.55 | 8.11E-06 | -1.18 | 1.96E-02 | 1.31 | 6.50E-04 |
| A_64_P035871 |           |                                                                                         | 2.92E-03 | -1.55 | 1.35E-04 | -1.18 | 8.13E-02 | 1.31 | 5.41E-03 |
| A_42_P739860 | Dusp5     | dual specificity phosphatase 5                                                          | 3.09E-02 | -1.55 | 9.94E-03 | -1.06 | 8.75E-01 | 1.46 | 1.87E-02 |
| A_44_P368065 | Adprh1    | ADP-ribosylhydrolase like 1                                                             | 3.38E-02 | -1.55 | 1.67E-02 | -1.00 | 1.00E+00 | 1.54 | 1.35E-02 |
| A_44_P455228 | Mgat5b    | mannosyl (alpha-1,6-)-glycoprotein beta-1,6-N-acetyl-glucosaminyltransferase, isozyme B | 2.43E-02 | -1.55 | 3.66E-03 | -1.25 | 1.22E-01 | 1.24 | 1.28E-01 |
| A_44_P190541 | Sgsm2     | small G protein signaling modulator 2                                                   | 3.71E-04 | -1.55 | 2.26E-06 | -1.16 | 2.39E-02 | 1.34 | 1.02E-04 |
| A_64_P127551 | LOC680442 | hypothetical protein LOC680442                                                          | 1.00E-02 | -1.55 | 4.99E-03 | 1.04  | 9.23E-01 | 1.62 | 1.80E-03 |



|               |              |                                                            |          |       |          |       |          |      |          |
|---------------|--------------|------------------------------------------------------------|----------|-------|----------|-------|----------|------|----------|
| A_64_P072054  | Dlgap3       | discs, large (Drosophila) homolog-associated protein 3     | 1.16E-02 | -1.55 | 1.18E-03 | -1.24 | 8.21E-02 | 1.25 | 6.24E-02 |
| A_64_P113404  | Mapk11       | mitogen-activated protein kinase 11                        | 2.73E-03 | -1.55 | 1.33E-04 | -1.15 | 1.44E-01 | 1.35 | 2.85E-03 |
| A_44_P493606  | Camk2n1      | calcium/calmodulin-dependent protein kinase II inhibitor 1 | 1.58E-02 | -1.55 | 2.07E-03 | -1.18 | 2.27E-01 | 1.31 | 3.66E-02 |
| A_44_P1050809 | MGC114464    | similar to expressed sequence AI836003                     | 2.63E-03 | -1.56 | 1.30E-04 | -1.14 | 1.77E-01 | 1.36 | 2.20E-03 |
| A_64_P029581  | R3hdm1       | R3H domain containing 1                                    | 1.21E-02 | -1.56 | 1.79E-03 | -1.12 | 4.79E-01 | 1.39 | 1.13E-02 |
| A_43_P16403   | Clca1        | chloride channel accessory 1                               | 2.85E-02 | -1.56 | 7.29E-03 | -1.09 | 7.27E-01 | 1.42 | 2.26E-02 |
| A_64_P013932  | Cckbr        | cholecystokinin B receptor                                 | 1.53E-02 | -1.56 | 1.83E-03 | -1.27 | 6.39E-02 | 1.23 | 1.24E-01 |
| A_43_P12023   | Nr4a2        | nuclear receptor subfamily 4, group A, member 2            | 3.56E-03 | -1.56 | 2.01E-04 | -1.17 | 1.25E-01 | 1.33 | 5.44E-03 |
| A_44_P1029253 | Mas1         | MAS1 oncogene                                              | 2.90E-02 | -1.56 | 5.61E-03 | -1.16 | 4.14E-01 | 1.35 | 4.66E-02 |
| A_44_P995504  | LOC100125362 | hypothetical protein LOC100125362                          | 2.31E-03 | -1.56 | 1.32E-04 | -1.11 | 3.41E-01 | 1.41 | 1.01E-03 |
| A_64_P154952  | Nr4a2        | nuclear receptor subfamily 4, group A, member 2            | 2.83E-03 | -1.56 | 1.18E-04 | -1.21 | 4.66E-02 | 1.29 | 8.28E-03 |
| A_44_P476598  | RGD1559864   | similar to mKIAA1045 protein                               | 9.53E-04 | -1.57 | 2.34E-05 | -1.11 | 2.20E-01 | 1.41 | 2.28E-04 |
| A_42_P675802  | Olfm3        | olfactomedin 3                                             | 2.16E-03 | -1.57 | 1.20E-04 | -1.11 | 3.41E-01 | 1.41 | 9.04E-04 |
| A_44_P274491  | Large        | like-glycosyltransferase                                   | 8.03E-04 | -1.57 | 2.17E-05 | -1.08 | 4.51E-01 | 1.46 | 8.94E-05 |
| A_64_P163070  | Grm4         | glutamate receptor, metabotropic 4                         | 9.30E-03 | -1.57 | 8.91E-04 | -1.20 | 1.51E-01 | 1.32 | 2.38E-02 |
| A_44_P851961  | Fbx116       | F-box and leucine-rich repeat protein 16                   | 6.94E-03 | -1.57 | 5.48E-04 | -1.21 | 1.05E-01 | 1.30 | 2.08E-02 |
| A_64_P085871  | Syndig11     | synapse differentiation inducing 1-like                    | 2.75E-02 | -1.58 | 4.60E-03 | -1.31 | 7.70E-02 | 1.21 | 2.41E-01 |
| A_64_P116501  | Kcnf1        | potassium voltage-gated channel, subfamily F, member 1     | 6.94E-03 | -1.58 | 5.85E-04 | -1.18 | 1.62E-01 | 1.33 | 1.38E-02 |
| A_44_P583834  | Cobl         | cordon-bleu WH2 repeat protein                             | 1.04E-02 | -1.58 | 1.11E-03 | -1.18 | 2.08E-01 | 1.34 | 2.09E-02 |

|               |           |                                                                          |          |       |          |       |          |      |          |
|---------------|-----------|--------------------------------------------------------------------------|----------|-------|----------|-------|----------|------|----------|
| A_64_P059993  | Shank1    | SH3 and multiple ankyrin repeat domains 1                                | 2.23E-03 | -1.58 | 4.18E-04 | 1.02  | 9.79E-01 | 1.61 | 2.02E-04 |
| A_44_P1015754 | Slc22a3   | solute carrier family 22 (extraneuronal monoamine transporter), member 3 | 4.05E-02 | -1.58 | 8.58E-03 | -1.19 | 3.56E-01 | 1.33 | 8.77E-02 |
| A_43_P23283   | St8sia5   | ST8 alpha-N-acetyl-neuraminide alpha-2,8-sialyltransferase 5             | 1.13E-02 | -1.58 | 1.37E-03 | -1.16 | 2.97E-01 | 1.36 | 1.67E-02 |
| A_44_P269425  | Necab2    | N-terminal EF-hand calcium binding protein 2                             | 1.06E-03 | -1.58 | 1.96E-05 | -1.19 | 3.74E-02 | 1.33 | 1.10E-03 |
| A_44_P192193  |           |                                                                          | 2.77E-04 | -1.58 | 1.26E-06 | -1.11 | 1.12E-01 | 1.43 | 1.32E-05 |
| A_44_P104054  | Crhbp     | corticotropin releasing hormone binding protein                          | 4.08E-02 | -1.59 | 1.31E-02 | -1.08 | 8.20E-01 | 1.47 | 3.06E-02 |
| A_44_P628515  |           |                                                                          | 8.03E-04 | -1.59 | 1.82E-05 | -1.10 | 2.96E-01 | 1.44 | 1.22E-04 |
| A_44_P263117  | Etv5      | ets variant 5                                                            | 1.91E-03 | -1.59 | 5.86E-05 | -1.23 | 2.72E-02 | 1.30 | 6.02E-03 |
| A_43_P12540   | Dgkz      | diacylglycerol kinase zeta                                               | 1.53E-02 | -1.59 | 2.84E-03 | -1.11 | 6.20E-01 | 1.44 | 1.17E-02 |
| A_64_P142922  | Cabp1     | calcium binding protein 1                                                | 8.36E-04 | -1.59 | 1.37E-05 | -1.16 | 6.75E-02 | 1.37 | 3.94E-04 |
| A_64_P060628  | Prmt8     | protein arginine methyltransferase 8                                     | 3.13E-04 | -1.60 | 2.20E-06 | -1.12 | 1.08E-01 | 1.43 | 2.67E-05 |
| A_43_P19118   | LOC681849 | similar to Protein C6orf142 homolog                                      | 1.75E-02 | -1.60 | 2.42E-03 | -1.20 | 2.38E-01 | 1.33 | 4.08E-02 |
| A_64_P048516  | Kctd8     | potassium channel tetramerisation domain containing 8                    | 6.55E-04 | -1.60 | 1.10E-05 | -1.11 | 2.07E-01 | 1.44 | 1.00E-04 |
| A_64_P115417  | Ntrk1     | neurotrophic tyrosine kinase, receptor, type 1                           | 1.33E-02 | -1.61 | 1.46E-03 | -1.26 | 8.43E-02 | 1.27 | 7.54E-02 |
| A_64_P108009  | Nrarp     | Notch-regulated ankyrin repeat protein                                   | 1.13E-02 | -1.61 | 1.39E-03 | -1.16 | 3.23E-01 | 1.38 | 1.52E-02 |
| A_42_P710324  | Nkiras1   | NFKB inhibitor interacting Ras-like 1                                    | 6.11E-04 | -1.61 | 8.63E-06 | -1.13 | 1.45E-01 | 1.43 | 1.07E-04 |
| A_44_P256301  | Grem1     | gremlin 1                                                                | 4.51E-04 | -1.61 | 4.12E-06 | -1.14 | 6.98E-02 | 1.41 | 8.54E-05 |
| A_64_P096083  |           |                                                                          | 1.44E-03 | -1.61 | 6.66E-05 | -1.10 | 4.34E-01 | 1.47 | 3.35E-04 |
| A_44_P433359  | Pde1b     | phosphodiesterase 1B, calmodulin-dependent                               | 9.37E-04 | -1.61 | 1.46E-05 | -1.21 | 2.42E-02 | 1.34 | 1.15E-03 |

|              |           |                                                                     |          |       |          |       |          |      |          |
|--------------|-----------|---------------------------------------------------------------------|----------|-------|----------|-------|----------|------|----------|
| A_43_P12779  | Nrn1      | neuritin 1                                                          | 2.00E-03 | -1.62 | 1.41E-04 | -1.08 | 6.26E-01 | 1.50 | 4.39E-04 |
| A_44_P320752 | Rasl11a   | RAS-like family 11 member A                                         | 1.07E-03 | -1.62 | 2.43E-05 | -1.16 | 1.04E-01 | 1.40 | 5.22E-04 |
| A_42_P584045 | Pde10a    | phosphodiesterase 10A                                               | 4.52E-02 | -1.62 | 9.85E-03 | -1.33 | 1.08E-01 | 1.21 | 3.35E-01 |
| A_42_P570635 |           |                                                                     | 3.96E-02 | -1.62 | 8.54E-03 | -1.19 | 3.98E-01 | 1.36 | 7.51E-02 |
| A_44_P538839 | Rasgrp2   | RAS guanyl releasing protein 2 (calcium and DAG-regulated)          | 3.97E-02 | -1.62 | 8.35E-03 | -1.35 | 8.43E-02 | 1.20 | 3.60E-01 |
| A_64_P109202 | Ctxn3     | cortexin 3                                                          | 4.33E-04 | -1.62 | 6.00E-06 | -1.08 | 3.76E-01 | 1.50 | 2.59E-05 |
| A_44_P791030 |           |                                                                     | 1.46E-02 | -1.63 | 1.80E-03 | -1.21 | 1.94E-01 | 1.34 | 3.80E-02 |
| A_64_P107095 | Sgcz      | sarcoglycan zeta                                                    | 2.88E-03 | -1.63 | 4.39E-04 | -1.02 | 9.80E-01 | 1.60 | 4.11E-04 |
| A_64_P158945 | Tcap      | titin-cap                                                           | 7.76E-03 | -1.63 | 7.58E-04 | -1.17 | 2.51E-01 | 1.39 | 1.09E-02 |
| A_44_P116591 | Cx3cl1    | chemokine (C-X3-C motif) ligand 1                                   | 1.97E-03 | -1.63 | 7.24E-05 | -1.18 | 9.81E-02 | 1.38 | 2.10E-03 |
| A_64_P010763 | Ptpn3     | protein tyrosine phosphatase, non-receptor type 3                   | 1.24E-02 | -1.63 | 1.40E-03 | -1.22 | 1.76E-01 | 1.34 | 3.25E-02 |
| A_64_P099886 | Vegfa     | vascular endothelial growth factor A                                | 2.38E-02 | -1.63 | 4.86E-03 | -1.13 | 5.63E-01 | 1.44 | 2.47E-02 |
| A_44_P151638 | Cyp11b1   | cytochrome P450, family 11, subfamily b, polypeptide 1              | 3.19E-03 | -1.64 | 3.88E-04 | -1.05 | 8.45E-01 | 1.56 | 6.74E-04 |
| A_64_P048230 | Tmem72    | transmembrane protein 72                                            | 2.53E-02 | -1.64 | 6.55E-03 | -1.09 | 7.69E-01 | 1.50 | 1.77E-02 |
| A_42_P534882 | Vsn1      | visinin-like 1                                                      | 3.68E-03 | -1.64 | 2.56E-04 | -1.15 | 2.69E-01 | 1.43 | 2.93E-03 |
| A_42_P540711 | Rasd2     | RASD family, member 2                                               | 3.22E-02 | -1.64 | 5.70E-03 | -1.25 | 2.03E-01 | 1.31 | 1.15E-01 |
| A_64_P012680 | LOC685987 | similar to spermatogenesis associated glutamate (E)-rich protein 4b | 1.51E-04 | -1.65 | 3.58E-07 | -1.11 | 1.07E-01 | 1.49 | 2.98E-06 |
| A_64_P064371 | Spata2L   | spermatogenesis associated 2-like                                   | 6.08E-03 | -1.65 | 4.66E-04 | -1.21 | 1.46E-01 | 1.37 | 1.21E-02 |
| A_44_P338381 | Cadps2    | Ca <sup>++</sup> -dependent secretion activator 2                   | 1.64E-03 | -1.65 | 6.91E-05 | -1.13 | 2.56E-01 | 1.46 | 6.82E-04 |

|              |        |                                                  |          |       |          |       |          |      |          |
|--------------|--------|--------------------------------------------------|----------|-------|----------|-------|----------|------|----------|
| A_64_P111898 | Mmp17  | matrix metalloproteinase 17                      | 3.01E-03 | -1.66 | 1.70E-04 | -1.16 | 2.01E-01 | 1.42 | 2.60E-03 |
| A_44_P331706 | Dnajb5 | DnaJ (Hsp40) homolog, subfamily B, member 5      | 2.60E-03 | -1.66 | 1.34E-04 | -1.16 | 2.14E-01 | 1.43 | 1.84E-03 |
| A_43_P11897  | Gabrd  | gamma-aminobutyric acid (GABA) A receptor, delta | 2.74E-02 | -1.66 | 4.41E-03 | -1.27 | 1.76E-01 | 1.31 | 1.05E-01 |
| A_44_P220519 | Lingo1 | leucine rich repeat and Ig domain containing 1   | 3.37E-03 | -1.67 | 2.46E-04 | -1.13 | 3.63E-01 | 1.47 | 1.89E-03 |
| A_64_P101130 | Cckbr  | cholecystokinin B receptor                       | 3.60E-02 | -1.67 | 6.67E-03 | -1.30 | 1.54E-01 | 1.29 | 1.78E-01 |
| A_44_P152395 | Rnd1   | Rho family GTPase 1                              | 2.81E-03 | -1.68 | 1.37E-04 | -1.19 | 1.33E-01 | 1.41 | 3.22E-03 |
| A_64_P100103 | Far2   | fatty acyl CoA reductase 2                       | 1.32E-03 | -1.68 | 4.27E-05 | -1.15 | 1.92E-01 | 1.46 | 5.40E-04 |
| A_64_P114960 | Kcnk4  | potassium channel, subfamily K, member 4         | 1.97E-03 | -1.68 | 6.62E-05 | -1.22 | 5.97E-02 | 1.38 | 3.16E-03 |
| A_64_P047616 | Prmt8  | protein arginine methyltransferase 8             | 6.58E-04 | -1.69 | 9.51E-06 | -1.15 | 1.14E-01 | 1.47 | 1.51E-04 |
| A_64_P122247 | Hcrtr1 | hypocretin (orexin) receptor 1                   | 4.26E-03 | -1.69 | 3.53E-04 | -1.14 | 3.60E-01 | 1.48 | 2.87E-03 |
| A_64_P104553 | Itpka  | inositol-trisphosphate 3-kinase A                | 9.28E-03 | -1.69 | 9.22E-04 | -1.22 | 1.88E-01 | 1.39 | 1.92E-02 |
| A_43_P18201  | Ovol2  | ovo-like 2 (Drosophila)                          | 4.19E-03 | -1.70 | 2.94E-04 | -1.18 | 2.26E-01 | 1.44 | 4.25E-03 |
| A_64_P089356 | Syt12  | synaptotagmin XII                                | 1.58E-03 | -1.70 | 7.52E-05 | -1.12 | 3.82E-01 | 1.52 | 4.57E-04 |
| A_44_P445044 | Apold1 | apolipoprotein L domain containing 1             | 1.78E-02 | -1.70 | 1.10E-02 | 1.06  | 9.26E-01 | 1.80 | 4.09E-03 |
| A_64_P075087 | Camk1g | calcium/calmodulin-dependent protein kinase IG   | 1.99E-05 | -1.70 | 9.87E-09 | -1.10 | 6.68E-02 | 1.55 | 5.70E-08 |
| A_64_P000534 | Sept5  | septin 5                                         | 2.16E-03 | -1.71 | 1.13E-04 | -1.14 | 2.89E-01 | 1.49 | 1.04E-03 |
| A_44_P467591 | Neu2   | sialidase 2 (cytosolic sialidase)                | 3.06E-02 | -1.71 | 5.24E-03 | -1.29 | 1.77E-01 | 1.33 | 1.24E-01 |
| A_64_P093798 | Otof   | otoferlin                                        | 5.00E-03 | -1.73 | 4.87E-04 | -1.14 | 4.37E-01 | 1.52 | 3.10E-03 |
| A_44_P388650 | Camk4  | calcium/calmodulin-dependent protein kinase IV   | 1.11E-02 | -1.73 | 1.18E-03 | -1.24 | 1.78E-01 | 1.40 | 2.69E-02 |

|               |         |                                                                            |          |       |          |       |          |      |          |
|---------------|---------|----------------------------------------------------------------------------|----------|-------|----------|-------|----------|------|----------|
| A_44_P150471  | Gpr88   | G-protein coupled receptor 88                                              | 2.43E-02 | -1.74 | 3.75E-03 | -1.27 | 2.01E-01 | 1.37 | 7.76E-02 |
| A_44_P545553  | Dgkb    | diacylglycerol kinase, beta                                                | 1.27E-02 | -1.74 | 1.39E-03 | -1.27 | 1.36E-01 | 1.37 | 4.33E-02 |
| A_64_P132856  | Lhx8    | LIM homeobox 8                                                             | 1.97E-02 | -1.75 | 3.00E-03 | -1.22 | 3.04E-01 | 1.44 | 3.73E-02 |
| A_44_P254984  | Pnlip   | pancreatic lipase                                                          | 2.91E-03 | -1.75 | 1.55E-04 | -1.19 | 1.81E-01 | 1.47 | 2.64E-03 |
| A_44_P1034950 | Adora2a | adenosine A2a receptor                                                     | 4.82E-02 | -1.75 | 1.04E-02 | -1.34 | 1.75E-01 | 1.31 | 2.30E-01 |
| A_64_P031910  | Pde10a  | phosphodiesterase 10A                                                      | 1.29E-02 | -1.76 | 1.40E-03 | -1.34 | 6.95E-02 | 1.31 | 8.76E-02 |
| A_42_P636627  | Cartpt  | CART prepropeptide                                                         | 7.87E-03 | -1.78 | 7.26E-04 | -1.23 | 1.97E-01 | 1.45 | 1.40E-02 |
| A_64_P129720  | Cacng3  | calcium channel, voltage-dependent, gamma subunit 3                        | 1.78E-03 | -1.79 | 7.37E-05 | -1.17 | 2.09E-01 | 1.53 | 9.36E-04 |
| A_44_P215157  | Lin7b   | lin-7 homolog b (C. elegans)                                               | 5.51E-03 | -1.79 | 4.02E-04 | -1.24 | 1.40E-01 | 1.44 | 1.07E-02 |
| A_64_P074725  |         |                                                                            | 1.58E-03 | -1.79 | 8.04E-05 | -1.12 | 4.41E-01 | 1.60 | 4.06E-04 |
| A_64_P005223  | Ppp1r1b | protein phosphatase 1, regulatory (inhibitor) subunit 1B                   | 1.87E-03 | -1.80 | 6.24E-05 | -1.24 | 6.77E-02 | 1.45 | 2.58E-03 |
| A_42_P743580  | Rgs4    | regulator of G-protein signaling 4                                         | 1.53E-03 | -1.81 | 6.30E-05 | -1.16 | 2.68E-01 | 1.57 | 5.81E-04 |
| A_44_P314969  | Slc6a3  | solute carrier family 6 (neurotransmitter transporter, dopamine), member 3 | 2.75E-02 | -1.81 | 4.63E-03 | -1.27 | 2.54E-01 | 1.42 | 7.29E-02 |
| A_43_P12559   | Camkk2  | calcium/calmodulin-dependent protein kinase kinase 2, beta                 | 2.86E-02 | -1.84 | 4.89E-03 | -1.29 | 2.49E-01 | 1.43 | 7.89E-02 |
| A_44_P307559  | Chrna3  | cholinergic receptor, nicotinic, alpha 3 (neuronal)                        | 3.22E-02 | -1.85 | 6.02E-03 | -1.27 | 3.09E-01 | 1.46 | 7.44E-02 |
| A_43_P11932   | Nr4a3   | nuclear receptor subfamily 4, group A, member 3                            | 1.22E-02 | -1.86 | 2.92E-03 | -1.07 | 8.83E-01 | 1.74 | 5.00E-03 |
| A_64_P131370  | Calr4   | calreticulin 4                                                             | 2.75E-02 | -1.87 | 5.30E-03 | -1.22 | 4.37E-01 | 1.53 | 4.07E-02 |
| A_64_P118532  | Casr    | calcium-sensing receptor                                                   | 1.42E-02 | -1.87 | 1.61E-03 | -1.39 | 6.79E-02 | 1.35 | 1.03E-01 |
| A_44_P158758  | Calcr   | calcitonin receptor                                                        | 3.69E-02 | -1.87 | 8.71E-03 | -1.20 | 5.53E-01 | 1.57 | 4.65E-02 |

|               |         |                                                                              |          |       |          |       |          |      |          |
|---------------|---------|------------------------------------------------------------------------------|----------|-------|----------|-------|----------|------|----------|
| A_43_P11794   | Tacr3   | tachykinin receptor 3                                                        | 1.75E-02 | -1.88 | 2.82E-03 | -1.21 | 4.17E-01 | 1.56 | 2.26E-02 |
| A_64_P131051  | Fos     | FBJ osteosarcoma oncogene                                                    | 2.27E-02 | -1.91 | 8.02E-03 | -1.04 | 9.64E-01 | 1.83 | 9.59E-03 |
| A_43_P12995   | Kcns1   | potassium voltage-gated channel, delayed-rectifier, subfamily S, member 1    | 2.16E-03 | -1.92 | 1.69E-04 | -1.10 | 6.70E-01 | 1.75 | 4.70E-04 |
| A_44_P1024627 | Kcnv1   | potassium channel, subfamily V, member 1                                     | 1.06E-05 | -1.93 | 9.26E-10 | -1.12 | 2.88E-02 | 1.73 | 5.03E-09 |
| A_64_P069261  | Arl4d   | ADP-ribosylation factor-like 4D                                              | 8.09E-04 | -1.94 | 1.09E-05 | -1.28 | 2.59E-02 | 1.51 | 7.38E-04 |
| A_64_P125345  | Kcnh4   | potassium voltage-gated channel, subfamily H (eag-related), member 4         | 3.06E-03 | -1.98 | 1.64E-04 | -1.25 | 1.57E-01 | 1.59 | 3.31E-03 |
| A_64_P116972  | Crh     | corticotropin releasing hormone                                              | 1.83E-02 | -1.98 | 3.28E-03 | -1.20 | 5.18E-01 | 1.66 | 1.89E-02 |
| A_43_P12478   | Crh     | corticotropin releasing hormone                                              | 1.75E-02 | -2.02 | 3.13E-03 | -1.20 | 5.29E-01 | 1.69 | 1.73E-02 |
| A_44_P384017  | Sncg    | synuclein, gamma (breast cancer-specific protein 1)                          | 2.29E-02 | -2.03 | 6.83E-03 | -1.09 | 8.89E-01 | 1.86 | 1.20E-02 |
| A_43_P12927   | Dusp1   | dual specificity phosphatase 1                                               | 1.81E-03 | -2.07 | 9.92E-05 | -1.15 | 4.42E-01 | 1.79 | 5.13E-04 |
| A_44_P870348  | Slc35d3 | solute carrier family 35, member D3                                          | 2.90E-02 | -2.10 | 6.41E-03 | -1.21 | 5.77E-01 | 1.73 | 3.15E-02 |
| A_64_P010905  |         |                                                                              | 9.05E-03 | -2.13 | 1.01E-03 | -1.26 | 3.08E-01 | 1.69 | 1.14E-02 |
| A_43_P15530   | S100b   | S100 calcium binding protein B                                               | 1.05E-02 | -2.16 | 1.88E-03 | -1.14 | 7.15E-01 | 1.89 | 5.61E-03 |
| A_64_P108389  | Plekhh1 | pleckstrin homology domain containing, family H (with MyTH4 domain) member 1 | 8.47E-03 | -2.19 | 4.59E-03 | 1.10  | 8.64E-01 | 2.42 | 1.29E-03 |
| A_44_P437896  | Bdnf    | brain-derived neurotrophic factor                                            | 7.87E-03 | -2.21 | 8.87E-04 | -1.24 | 3.91E-01 | 1.78 | 7.13E-03 |
| A_44_P398529  | Lamp5   | lysosomal-associated membrane protein family, member 5                       | 1.28E-03 | -2.26 | 3.49E-05 | -1.28 | 1.12E-01 | 1.76 | 7.54E-04 |
| A_43_P12619   | Nr4a3   | nuclear receptor subfamily 4, group A, member 3                              | 2.23E-03 | -2.27 | 1.27E-04 | -1.21 | 3.51E-01 | 1.88 | 9.25E-04 |
| A_64_P023694  | Enthd1  | ENTH domain containing 1                                                     | 1.06E-03 | -2.29 | 2.60E-05 | -1.25 | 1.54E-01 | 1.83 | 3.79E-04 |
| A_44_P233080  | Egr1    | early growth response 1                                                      | 1.46E-03 | -2.78 | 6.49E-05 | -1.24 | 3.79E-01 | 2.25 | 3.91E-04 |

|              |        |                                                    |          |       |          |       |          |      |          |
|--------------|--------|----------------------------------------------------|----------|-------|----------|-------|----------|------|----------|
| A_64_P052697 | Tmco5a | transmembrane and coiled-coil domains 5A           | 1.07E-03 | -2.83 | 2.57E-05 | -1.34 | 1.32E-01 | 2.10 | 4.41E-04 |
| A_44_P345298 | Cort   | cortistatin                                        | 2.10E-03 | -3.10 | 7.09E-05 | -1.64 | 3.22E-02 | 1.90 | 6.45E-03 |
| A_64_P082693 | Egr1   | early growth response 1                            | 3.89E-04 | -3.15 | 4.07E-06 | -1.25 | 2.35E-01 | 2.51 | 2.72E-05 |
| A_42_P682589 | Nr4a1  | nuclear receptor subfamily 4, group A, member 1    | 5.45E-04 | -3.37 | 9.38E-06 | -1.23 | 3.85E-01 | 2.74 | 4.21E-05 |
| A_42_P473594 | Egr2   | early growth response 2                            | 7.31E-03 | -4.27 | 8.76E-04 | -1.41 | 4.74E-01 | 3.03 | 5.24E-03 |
| A_44_P118724 | Arc    | activity-regulated cytoskeleton-associated protein | 1.02E-03 | -4.28 | 3.94E-05 | -1.24 | 5.66E-01 | 3.45 | 1.26E-04 |
| A_42_P708068 | Egr4   | early growth response 4                            | 1.41E-03 | -4.60 | 8.04E-05 | -1.23 | 6.50E-01 | 3.73 | 2.20E-04 |

<sup>a</sup> Probe ID of Agilent rat mRNA microarray chip (SurePrint G3 Rat Gene Expression 8x60k, Agilent Inc., CA, USA)

<sup>b</sup> p-value of ANOVA test after correction of Benjamini-Hochberg's test

Abbreviation: FD, fold difference; NL, normal group

Supplementary Ttable 2. List of differentially expressed genes between MSC group and sham group

| Probe ID <sup>a</sup> | Gene symbol | Gene name                                                                    | MSC vs. Sham |          |
|-----------------------|-------------|------------------------------------------------------------------------------|--------------|----------|
|                       |             |                                                                              | FD           | <i>p</i> |
| A_42_P708068          | Egr4        | early growth response 4                                                      | 3.73         | 2.20E-04 |
| A_44_P118724          | Arc         | activity-regulated cytoskeleton-associated protein                           | 3.45         | 1.26E-04 |
| A_42_P473594          | Egr2        | early growth response 2                                                      | 3.03         | 5.24E-03 |
| A_42_P682589          | Nr4a1       | nuclear receptor subfamily 4, group A, member 1                              | 2.74         | 4.21E-05 |
| A_64_P082693          | Egr1        | early growth response 1                                                      | 2.51         | 2.72E-05 |
| A_64_P108389          | Plekhh1     | pleckstrin homology domain containing, family H (with MyTH4 domain) member 1 | 2.42         | 1.29E-03 |
| A_44_P233080          | Egr1        | early growth response 1                                                      | 2.25         | 3.91E-04 |
| A_64_P052697          | Tmco5a      | transmembrane and coiled-coil domains 5A                                     | 2.10         | 4.41E-04 |
| A_44_P345298          | Cort        | cortistatin                                                                  | 1.90         | 6.45E-03 |
| A_43_P15530           | S100b       | S100 calcium binding protein B                                               | 1.89         | 5.61E-03 |
| A_43_P12619           | Nr4a3       | nuclear receptor subfamily 4, group A, member 3                              | 1.88         | 9.25E-04 |
| A_44_P384017          | Sncg        | synuclein, gamma (breast cancer-specific protein 1)                          | 1.86         | 1.20E-02 |
| A_64_P131051          | Fos         | FBJ osteosarcoma oncogene                                                    | 1.83         | 9.59E-03 |
| A_64_P023694          | Enthd1      | ENTH domain containing 1                                                     | 1.83         | 3.79E-04 |
| A_44_P445044          | Apold1      | apolipoprotein L domain containing 1                                         | 1.80         | 4.09E-03 |
| A_43_P12927           | Dusp1       | dual specificity phosphatase 1                                               | 1.79         | 5.13E-04 |
| A_44_P437896          | Bdnf        | brain-derived neurotrophic factor                                            | 1.78         | 7.13E-03 |
| A_44_P398529          | Lamp5       | lysosomal-associated membrane protein family, member 5                       | 1.76         | 7.54E-04 |
| A_43_P12995           | Kcns1       | potassium voltage-gated channel, delayed-rectifier, subfamily S, member 1    | 1.75         | 4.70E-04 |
| A_43_P11932           | Nr4a3       | nuclear receptor subfamily 4, group A, member 3                              | 1.74         | 5.00E-03 |
| A_44_P1024627         | Kcnv1       | potassium channel, subfamily V, member 1                                     | 1.73         | 5.03E-09 |
| A_44_P870348          | Slc35d3     | solute carrier family 35, member D3                                          | 1.73         | 3.15E-02 |
| A_43_P12478           | Crh         | corticotropin releasing hormone                                              | 1.69         | 1.73E-02 |
| A_64_P010905          |             |                                                                              | 1.69         | 1.14E-02 |
| A_64_P116972          | Crh         | corticotropin releasing hormone                                              | 1.66         | 1.89E-02 |
| A_64_P081780          |             |                                                                              | 1.65         | 3.89E-02 |



|                   |           |                                                                      |       |          |
|-------------------|-----------|----------------------------------------------------------------------|-------|----------|
| A_64_P127551      | LOC680442 | hypothetical protein LOC680442                                       | 1.62  | 1.80E-03 |
| A_64_P059993      | Shank1    | SH3 and multiple ankyrin repeat domains 1                            | 1.61  | 2.02E-04 |
| A_64_P074725      |           |                                                                      | 1.60  | 4.06E-04 |
| A_64_P107095      | Sgcz      | sarcoglycan zeta                                                     | 1.60  | 4.11E-04 |
| A_64_P125345      | Kcnh4     | potassium voltage-gated channel, subfamily H (eag-related), member 4 | 1.59  | 3.31E-03 |
| A_44_P158758      | Calcr     | calcitonin receptor                                                  | 1.57  | 4.65E-02 |
| A_42_P743580      | Rgs4      | regulator of G-protein signaling 4                                   | 1.57  | 5.81E-04 |
| A_43_P11794       | Tacr3     | tachykinin receptor 3                                                | 1.56  | 2.26E-02 |
| A_44_P151638      | Cyp11b1   | cytochrome P450, family 11, subfamily b, polypeptide 1               | 1.56  | 6.74E-04 |
| A_64_P075087      | Camk1g    | calcium/calmodulin-dependent protein kinase IG                       | 1.55  | 5.70E-08 |
| A_64_P054818      | LOC690326 | hypothetical protein LOC690326                                       | 1.55  | 6.87E-03 |
| A_44_P368065      | Adprh1    | ADP-ribosylhydrolase like 1                                          | 1.54  | 1.35E-02 |
| A_64_P124205      |           |                                                                      | 1.53  | 2.33E-02 |
| A_64_P131370      | Calr4     | calreticulin 4                                                       | 1.53  | 4.07E-02 |
| A_64_P129720      | Cacng3    | calcium channel, voltage-dependent, gamma subunit 3                  | 1.53  | 9.36E-04 |
| A_64_P161195      | Tmigd1    | transmembrane and immunoglobulin domain containing 1                 | 1.52  | 3.23E-02 |
| A_64_P093798      | Otof      | otoferlin                                                            | 1.52  | 3.10E-03 |
| A_64_P089356      | Syt12     | synaptotagmin XII                                                    | 1.52  | 4.57E-04 |
| A_64_P010950      | Vom1r23   | vomeronasal 1 receptor 23                                            | 1.52  | 3.88E-02 |
| A_44_P433818      | Frem3     | FRAS1 related extracellular matrix 3                                 | 1.51  | 2.63E-02 |
| A_64_P069261      | Arl4d     | ADP-ribosylation factor-like 4D                                      | 1.51  | 7.38E-04 |
| A_64_P048230      | Tmem72    | transmembrane protein 72                                             | 1.50  | 1.77E-02 |
| A_43_P12779       | Nrn1      | neuritin 1                                                           | 1.50  | 4.39E-04 |
| A_64_P151318      | LOC313641 | perlecan                                                             | -1.50 | 7.34E-05 |
| A_44_P458878      | Tcf19     | transcription factor 19                                              | -1.50 | 5.77E-03 |
| A_42_P812008      | Nupr1     | nuclear protein, transcriptional regulator, 1                        | -1.50 | 7.53E-03 |
| A_44_P144741      | Blnk      | B-cell linker                                                        | -1.51 | 1.13E-02 |
| A_44_P102380<br>1 | Kif23     | kinesin family member 23                                             | -1.51 | 2.80E-03 |
| A_64_P155186      | Aurka     | aurora kinase A                                                      | -1.51 | 3.81E-03 |

|               |              |                                                                           |       |          |
|---------------|--------------|---------------------------------------------------------------------------|-------|----------|
| A_42_P527141  | Foxm1        | forkhead box M1                                                           | -1.51 | 3.20E-03 |
| A_64_P055102  | Eci3         | enoyl-Coenzyme A delta isomerase 3                                        | -1.51 | 1.52E-03 |
| A_64_P056689  |              |                                                                           | -1.51 | 7.55E-05 |
| A_44_P248133  | Tagln2       | transgelin 2                                                              | -1.51 | 4.67E-02 |
| A_44_P161233  | Il18         | interleukin 18                                                            | -1.51 | 2.18E-02 |
| A_64_P022615  | Vamp5        | vesicle-associated membrane protein 5                                     | -1.51 | 1.36E-03 |
| A_44_P301608  | Ucp2         | uncoupling protein 2 (mitochondrial, proton carrier)                      | -1.51 | 4.88E-03 |
| A_44_P178519  | Adamts7      | ADAM metallopeptidase with thrombospondin type 1 motif, 7                 | -1.51 | 1.37E-04 |
| A_64_P068622  | Hist1h2ail   | histone cluster 1, H2ai-like                                              | -1.51 | 1.75E-03 |
| A_44_P358194  | Fmo3         | flavin containing monooxygenase 3                                         | -1.52 | 2.58E-03 |
| A_64_P015549  | Lyl1         | lymphoblastic leukemia derived sequence 1                                 | -1.52 | 1.93E-03 |
| A_64_P027048  | Mcm2         | minichromosome maintenance complex component 2                            | -1.52 | 7.11E-04 |
| A_64_P080025  | Serping1     | serpin peptidase inhibitor, clade G (C1 inhibitor), member 1              | -1.52 | 1.09E-02 |
| A_42_P629321  | Wisp2        | WNT1 inducible signaling pathway protein 2                                | -1.53 | 9.79E-03 |
| A_64_P052626  | Msn          | moesin                                                                    | -1.53 | 4.07E-02 |
| A_44_P1039249 | Dok3         | docking protein 3                                                         | -1.53 | 2.06E-02 |
| A_44_P297777  | Flna         | filamin A, alpha                                                          | -1.53 | 1.30E-03 |
| A_44_P520859  | Pkmyt1       | protein kinase, membrane associated tyrosine/threonine 1                  | -1.53 | 1.23E-03 |
| A_64_P045506  |              |                                                                           | -1.53 | 6.18E-04 |
| A_64_P098454  | Fermt3       | fermitin family member 3                                                  | -1.53 | 8.42E-03 |
| A_64_P078679  | Slc22a2      | solute carrier family 22 (organic cation transporter), member 2           | -1.54 | 2.64E-02 |
| A_44_P501898  | Chtf18       | CTF18, chromosome transmission fidelity factor 18 homolog (S. cerevisiae) | -1.54 | 3.75E-05 |
| A_44_P681660  | Fn1          | fibronectin 1                                                             | -1.54 | 4.45E-03 |
| A_64_P1627609 | LOC100362769 | hypothetical protein LOC100362769                                         | -1.54 | 1.15E-02 |
| A_64_P012061  | Bmp7         | bone morphogenetic protein 7                                              | -1.54 | 5.86E-05 |
| A_42_P771570  | Cd33         | CD33 molecule                                                             | -1.54 | 3.17E-02 |
| A_44_P276338  | Mcm6         | minichromosome maintenance complex component 6                            | -1.55 | 1.05E-02 |
| A_44_P879764  | B4galt1      | UDP-Gal:betaGlcNAc beta 1,4-galactosyltransferase, polypeptide 1          | -1.55 | 1.26E-02 |
| A_64_P137075  | Col7a1       | collagen, type VII, alpha 1                                               | -1.55 | 5.31E-03 |

|                   |           |                                                                       |       |              |
|-------------------|-----------|-----------------------------------------------------------------------|-------|--------------|
| A_44_P104131<br>2 | Fes       | feline sarcoma oncogene                                               | -1.55 | 2.89E-<br>02 |
| A_42_P794130      | Cdc20     | cell division cycle 20 homolog (S. cerevisiae)                        | -1.55 | 1.98E-<br>03 |
| A_64_P126851      | LOC498276 | Fc gamma receptor II beta                                             | -1.55 | 2.25E-<br>02 |
| A_64_P124249      | LOC690976 | similar to Calponin-2 (Calponin H2, smooth muscle) (Neutral calponin) | -1.56 | 5.85E-<br>03 |
| A_64_P084995      | Tnfrsf26  | tumor necrosis factor receptor superfamily, member 26                 | -1.56 | 8.42E-<br>03 |
| A_44_P105225      | Loxl2     | lysyl oxidase-like 2                                                  | -1.56 | 1.35E-<br>02 |
| A_43_P13117       | Lcp2      | lymphocyte cytosolic protein 2                                        | -1.56 | 3.07E-<br>02 |
| A_43_P15904       | Fcgr1a    | Fc fragment of IgG, high affinity Ia, receptor (CD64)                 | -1.56 | 3.60E-<br>02 |
| A_44_P808057      | Lrrc8a    | leucine rich repeat containing 8 family, member A                     | -1.56 | 2.02E-<br>02 |
| A_64_P083600      | Fxyd5     | FXFD domain-containing ion transport regulator 5                      | -1.56 | 6.45E-<br>03 |
| A_43_P11448       | Cp        | ceruloplasmin (ferroxidase)                                           | -1.56 | 4.62E-<br>03 |
| A_44_P579385      | Ahnak     | AHNAK nucleoprotein                                                   | -1.57 | 2.39E-<br>05 |
| A_43_P11749       | Hck       | hemopoietic cell kinase                                               | -1.57 | 4.94E-<br>02 |
| A_64_P155950      |           |                                                                       | -1.57 | 8.37E-<br>04 |
| A_44_P354078      | Hist1h1a  | histone cluster 1, H1a                                                | -1.57 | 1.24E-<br>03 |
| A_44_P113933      | Tyms      | thymidylate synthetase                                                | -1.57 | 1.02E-<br>03 |
| A_64_P100963      | Ncaph     | non-SMC condensin I complex, subunit H                                | -1.57 | 1.27E-<br>02 |
| A_64_P019719      | Srpx2     | sushi-repeat-containing protein, X-linked 2                           | -1.57 | 3.42E-<br>03 |
| A_64_P024297      | Gmfg      | glia maturation factor, gamma                                         | -1.57 | 1.64E-<br>02 |
| A_64_P114913      | Vwf       | von Willebrand factor                                                 | -1.58 | 5.87E-<br>03 |
| A_44_P103704<br>1 | Map3k6    | mitogen-activated protein kinase kinase kinase 6                      | -1.58 | 3.41E-<br>03 |
| A_64_P071973      | Fcgr2b    | Fc fragment of IgG, low affinity IIb, receptor (CD32)                 | -1.58 | 2.34E-<br>02 |
| A_44_P105048<br>0 | Ecm1      | extracellular matrix protein 1                                        | -1.59 | 1.07E-<br>03 |
| A_44_P518500      | Racgap1   | Rac GTPase-activating protein 1                                       | -1.59 | 3.55E-<br>02 |
| A_64_P045476      | C1qb      | complement component 1, q subcomponent, B chain                       | -1.60 | 2.89E-<br>03 |
| A_64_P068473      |           |                                                                       | -1.60 | 9.67E-<br>03 |
| A_44_P103009<br>8 | Cdc45     | cell division cycle 45 homolog (S. cerevisiae)                        | -1.61 | 3.92E-<br>04 |
| A_64_P050660      | Tnfaip8l2 | tumor necrosis factor, alpha-induced protein 8-like 2                 | -1.61 | 1.27E-<br>02 |
| A_42_P480224      | Gpd1      | glycerol-3-phosphate dehydrogenase 1 (soluble)                        | -1.61 | 9.10E-<br>03 |

|               |         |                                                                      |       |          |
|---------------|---------|----------------------------------------------------------------------|-------|----------|
| A_64_P144492  | Mall    | mal, T-cell differentiation protein-like                             | -1.61 | 2.98E-03 |
| A_64_P041526  | Hmgb2   | high mobility group box 2                                            | -1.62 | 4.52E-04 |
| A_64_P041797  | Hspb9   | heat shock protein, alpha-crystallin-related, B9                     | -1.63 | 7.57E-03 |
| A_42_P588944  | Mgp     | matrix Gla protein                                                   | -1.64 | 1.69E-04 |
| A_64_P034414  | Tnf     | tumor necrosis factor                                                | -1.65 | 2.84E-04 |
| A_44_P513385  | Dab2    | disabled 2, mitogen-responsive phosphoprotein                        | -1.66 | 2.84E-05 |
| A_64_P038872  | A2m     | alpha-2-macroglobulin                                                | -1.66 | 2.61E-03 |
| A_64_P101301  | Clec4a3 | C-type lectin domain family 4, member A3                             | -1.66 | 1.83E-02 |
| A_44_P515852  | Tpx2    | TPX2, microtubule-associated, homolog (Xenopus laevis)               | -1.66 | 2.93E-03 |
| A_42_P576953  | Pla1a   | phospholipase A1 member A                                            | -1.66 | 3.92E-03 |
| A_44_P286788  | Ncf4    | neutrophil cytosolic factor 4                                        | -1.66 | 4.82E-02 |
| A_44_P500708  | C1qc    | complement component 1, q subcomponent, C chain                      | -1.66 | 1.62E-02 |
| A_64_P038873  | A2m     | alpha-2-macroglobulin                                                | -1.67 | 2.48E-03 |
| A_64_P038414  | Lox     | lysyl oxidase                                                        | -1.67 | 1.57E-03 |
| A_44_P1014902 |         |                                                                      | -1.67 | 1.85E-02 |
| A_42_P565275  | Aspm    | asp (abnormal spindle) homolog, microcephaly associated (Drosophila) | -1.67 | 3.83E-03 |
| A_64_P123346  | Xdh     | xanthine dehydrogenase                                               | -1.67 | 6.24E-03 |
| A_42_P839964  | Plin2   | perilipin 2                                                          | -1.68 | 3.26E-02 |
| A_42_P517399  | Emp3    | epithelial membrane protein 3                                        | -1.68 | 2.12E-02 |
| A_42_P567268  | Mt2A    | metallothionein 2A                                                   | -1.68 | 1.24E-02 |
| A_64_P001401  | Tinagl1 | tubulointerstitial nephritis antigen-like 1                          | -1.68 | 4.65E-03 |
| A_44_P1020422 | Nes     | nestin                                                               | -1.68 | 8.33E-03 |
| A_44_P226597  | Pycard  | PYD and CARD domain containing                                       | -1.69 | 1.56E-02 |
| A_64_P134741  | Hcls1   | hematopoietic cell specific Lyn substrate 1                          | -1.69 | 3.35E-03 |
| A_64_P144944  | Dab2    | disabled 2, mitogen-responsive phosphoprotein                        | -1.69 | 2.21E-05 |
| A_64_P107105  |         |                                                                      | -1.69 | 1.01E-04 |
| A_64_P158939  | Mt2A    | metallothionein 2A                                                   | -1.70 | 1.12E-02 |
| A_44_P344346  | Arpc1b  | actin related protein 2/3 complex, subunit 1B                        | -1.70 | 2.09E-02 |
| A_44_P237153  | Birc5   | baculoviral IAP repeat-containing 5                                  | -1.70 | 3.04E-03 |

|              |           |                                                                                         |       |          |
|--------------|-----------|-----------------------------------------------------------------------------------------|-------|----------|
| A_64_P136571 | Ssc5d     | scavenger receptor cysteine rich domain containing (5 domains)                          | -1.71 | 4.60E-03 |
| A_43_P13102  | Ada       | adenosine deaminase                                                                     | -1.71 | 1.16E-04 |
| A_64_P044663 | Rac2      | ras-related C3 botulinum toxin substrate 2 (rho family, small GTP binding protein Rac2) | -1.71 | 2.32E-02 |
| A_64_P107106 | Hmgb2     | high mobility group box 2                                                               | -1.71 | 1.28E-04 |
| A_42_P544601 | Tspo      | translocator protein                                                                    | -1.72 | 4.69E-02 |
| A_44_P993328 | Ms4a11    | membrane-spanning 4-domains, subfamily A, member 11                                     | -1.73 | 2.26E-02 |
| A_64_P011779 | Sult1a1   | sulfotransferase family, cytosolic, 1A, phenol-preferring, member 1                     | -1.74 | 4.59E-02 |
| A_64_P066979 | Hist1h1b  | histone cluster 1, H1b                                                                  | -1.75 | 1.19E-02 |
| A_64_P148321 | Nes       | nestin                                                                                  | -1.75 | 5.49E-03 |
| A_64_P018781 | Calcb     | calcitonin-related polypeptide, beta                                                    | -1.75 | 4.57E-02 |
| A_64_P005576 | Anxa2     | annexin A2                                                                              | -1.75 | 2.36E-04 |
| A_64_P051322 | Ncf1      | neutrophil cytosolic factor 1                                                           | -1.75 | 2.96E-02 |
| A_64_P104538 | Ttk       | Ttk protein kinase                                                                      | -1.75 | 9.81E-04 |
| A_64_P016810 | Myo1f     | myosin IF                                                                               | -1.76 | 3.23E-02 |
| A_64_P108200 | Kif22     | kinesin family member 22                                                                | -1.76 | 8.68E-03 |
| A_43_P11537  | Rbp1      | retinol binding protein 1, cellular                                                     | -1.77 | 1.20E-04 |
| A_44_P465931 | Clic1     | chloride intracellular channel 1                                                        | -1.77 | 2.10E-02 |
| A_44_P577090 | Rad51     | RAD51 homolog (S. cerevisiae)                                                           | -1.77 | 2.02E-03 |
| A_44_P463313 | Plk1      | polo-like kinase 1                                                                      | -1.77 | 4.98E-03 |
| A_64_P268234 | Spc24-ps1 | SPC24, NDC80 kinetochore complex component, homolog (S. cerevisiae), pseudogene 1       | -1.78 | 1.64E-05 |
| A_44_P306439 | Fcgr3a    | Fc fragment of IgG, low affinity IIIa, receptor                                         | -1.78 | 1.87E-02 |
| A_44_P339798 | Hist1h1b  | histone cluster 1, H1b                                                                  | -1.80 | 5.71E-03 |
| A_42_P735417 | Fcgr2b    | Fc fragment of IgG, low affinity IIb, receptor (CD32)                                   | -1.81 | 1.03E-02 |
| A_42_P843603 | Tk1       | thymidine kinase 1, soluble                                                             | -1.81 | 3.46E-03 |
| A_64_P031691 | Actg2     | actin, gamma 2, smooth muscle, enteric                                                  | -1.81 | 3.96E-03 |
| A_64_P028205 | Lrg1      | leucine-rich alpha-2-glycoprotein 1                                                     | -1.81 | 6.01E-04 |
| A_44_P874677 | Tmem252   | transmembrane protein 252                                                               | -1.82 | 3.03E-03 |
| A_64_P050303 | Spc25     | SPC25, NDC80 kinetochore complex component, homolog (S. cerevisiae)                     | -1.83 | 5.72E-03 |

|              |              |                                                         |       |          |
|--------------|--------------|---------------------------------------------------------|-------|----------|
| A_44_P486312 | Fmo2         | flavin containing monooxygenase 2                       | -1.83 | 1.40E-02 |
| A_64_P052745 | Mcm3         | minichromosome maintenance complex component 3          | -1.83 | 8.73E-03 |
| A_44_P234129 | Dlgap5       | discs, large (Drosophila) homolog-associated protein 5  | -1.84 | 3.23E-03 |
| A_43_P17697  | Ms4a6b       | membrane-spanning 4-domains, subfamily A, member 6B     | -1.84 | 7.61E-03 |
| A_42_P520891 | Prc1         | protein regulator of cytokinesis 1                      | -1.84 | 1.32E-02 |
| A_44_P426107 | Akr1b8       | aldo-keto reductase family 1, member B8                 | -1.85 | 7.61E-04 |
| A_64_P060291 | Glipr1       | GLI pathogenesis-related 1                              | -1.85 | 3.70E-02 |
| A_44_P378799 | Igfbp6       | insulin-like growth factor binding protein 6            | -1.85 | 7.43E-05 |
| A_44_P445070 | Lgals1       | lectin, galactoside-binding, soluble, 1                 | -1.86 | 5.97E-03 |
| A_42_P712191 | Gins1        | GIN5 complex subunit 1 (Psf1 homolog)                   | -1.89 | 1.28E-03 |
| A_42_P581001 | S100a6       | S100 calcium binding protein A6                         | -1.89 | 8.21E-04 |
| A_64_P162764 |              |                                                         | -1.89 | 4.06E-03 |
| A_43_P11614  | Anxa1        | annexin A1                                              | -1.89 | 2.35E-04 |
| A_64_P123603 | Mt1a         | metallothionein 1a                                      | -1.89 | 6.10E-03 |
| A_64_P048461 | Mcm3         | minichromosome maintenance complex component 3          | -1.90 | 2.05E-03 |
| A_42_P788740 | Folr2        | folate receptor 2 (fetal)                               | -1.90 | 1.99E-02 |
| A_44_P822041 | LOC685108    | similar to proteolipid protein 2                        | -1.91 | 5.40E-03 |
| A_44_P588315 | Lyve1        | lymphatic vessel endothelial hyaluronan receptor 1      | -1.91 | 6.53E-03 |
| A_64_P126065 | Hcst         | hematopoietic cell signal transducer                    | -1.91 | 6.06E-04 |
| A_44_P550662 | Ms4a6a       | membrane-spanning 4-domains, subfamily A, member 6A     | -1.93 | 4.96E-03 |
| A_64_P025753 | Bub1         | budding uninhibited by benzimidazoles 1 homolog (yeast) | -1.94 | 3.74E-03 |
| A_64_P071495 | Actg2        | actin, gamma 2, smooth muscle, enteric                  | -1.95 | 1.67E-02 |
| A_42_P509365 | Vim          | vimentin                                                | -1.97 | 7.32E-03 |
| A_64_P166385 | Kifc1        | kinesin family member C1                                | -1.97 | 2.66E-04 |
| A_64_P153552 | LOC100362296 | protein S100-A11-like                                   | -1.97 | 6.20E-03 |
| A_64_P019260 | Cd68         | Cd68 molecule                                           | -1.97 | 4.39E-02 |
| A_43_P11370  | Plp2         | proteolipid protein 2 (colonic epithelium-enriched)     | -1.99 | 1.89E-03 |
| A_43_P14233  | Pttg1        | pituitary tumor-transforming 1                          | -1.99 | 5.45E-03 |
| A_42_P576823 | Mki67        | antigen identified by monoclonal antibody Ki-67         | -2.00 | 7.94E-04 |

|               |            |                                                               |       |          |
|---------------|------------|---------------------------------------------------------------|-------|----------|
| A_44_P360772  | Tagln      | transgelin                                                    | -2.01 | 8.06E-06 |
| A_43_P11489   | S100a4     | S100 calcium-binding protein A4                               | -2.04 | 3.85E-02 |
| A_64_P117363  |            |                                                               | -2.04 | 8.09E-03 |
| A_64_P068353  | Mki67      | antigen identified by monoclonal antibody Ki-67               | -2.06 | 2.08E-03 |
| A_64_P104009  | Rrm2       | ribonucleotide reductase M2                                   | -2.08 | 1.87E-02 |
| A_43_P12626   | Msln       | mesothelin                                                    | -2.09 | 5.95E-04 |
| A_42_P818287  | Nusap1     | nucleolar and spindle associated protein 1                    | -2.10 | 8.19E-04 |
| A_64_P095920  | Ccl6       | chemokine (C-C motif) ligand 6                                | -2.12 | 1.92E-03 |
| A_43_P16707   | Ccl6       | chemokine (C-C motif) ligand 6                                | -2.12 | 1.35E-03 |
| A_64_P163822  | Cks2       | CDC28 protein kinase regulatory subunit 2                     | -2.12 | 8.06E-03 |
| A_64_P036925  | Cp         | ceruloplasmin (ferroxidase)                                   | -2.14 | 1.26E-03 |
| A_64_P147868  | RGD1563581 | similar to S100 calcium binding protein A11 (calizzarin)      | -2.15 | 7.23E-04 |
| A_64_P147871  | S100a11    | S100 calcium binding protein A11                              | -2.17 | 7.21E-04 |
| A_64_P048183  | Ckap2      | cytoskeleton associated protein 2                             | -2.18 | 1.85E-02 |
| A_44_P1032296 | Capg       | capping protein (actin filament), gelsolin-like               | -2.18 | 1.97E-02 |
| A_64_P001740  | Ccna2      | cyclin A2                                                     | -2.18 | 1.41E-02 |
| A_44_P1042711 | Kif20a     | kinesin family member 20A                                     | -2.18 | 2.12E-03 |
| A_64_P163919  | Mki67      | antigen identified by monoclonal antibody Ki-67               | -2.20 | 4.98E-04 |
| A_43_P11142   | S100a11    | S100 calcium binding protein A11                              | -2.21 | 5.30E-04 |
| A_64_P147373  | Gja5       | gap junction protein, alpha 5                                 | -2.25 | 1.69E-05 |
| A_64_P098921  | Cdca3      | cell division cycle associated 3                              | -2.28 | 1.51E-02 |
| A_64_P001741  | Ccna2      | cyclin A2                                                     | -2.33 | 5.43E-03 |
| A_64_P045922  | Clec12a    | C-type lectin domain family 12, member A                      | -2.34 | 6.28E-03 |
| A_43_P12698   | Lgals3     | lectin, galactoside-binding, soluble, 3                       | -2.36 | 3.71E-02 |
| A_64_P038107  | Apobec1    | apolipoprotein B mRNA editing enzyme, catalytic polypeptide 1 | -2.41 | 9.81E-04 |
| A_42_P580844  | Cdk1       | cyclin-dependent kinase 1                                     | -2.43 | 3.19E-03 |
| A_64_P158653  | Knstrn     | kinetochore-localized astrin/SPAG5 binding protein            | -2.51 | 6.48E-03 |
| A_44_P461154  | Timp1      | TIMP metalloproteinase inhibitor 1                            | -2.88 | 1.13E-03 |
| A_64_P078332  | Glycam1    | glycosylation dependent cell adhesion molecule 1              | -2.96 | 1.73E-02 |

<sup>a</sup> Probe ID of Agilent rat mRNA microarray chip (SurePrint G3 Rat Gene Expression 8x60k, Agilent Inc., CA, USA)

Abbreviation: FD, fold difference
